# Supplementary material for: Prevalence of and factors associated with fewer than 20 remaining teeth in Taiwanese adults with disabilities: a community-based cross-sectional study
Source: PubMed Central journal article supplement — BMJ Open. 2017 Oct 8;7(10):e016270. doi: 10.1136/bmjopen-2017-016270 (PMC5639993; doi:10.1136/bmjopen-2017-016270), 2017-10-08
Supplement: bmjopen-2017-016270.draft_revisions.pdf [file bmjopen-2017-016270.draft_revisions.pdf]

# BMJ Open

BMJ Open is committed to open peer review. As part of this commitment we make the peer review history of every article we publish publicly available.

When an article is published we post the peer reviewers' comments and the authors' responses online. We also post the versions of the paper that were used during peer review. These are the versions that the peer review comments apply to.

The versions of the paper that follow are the versions that were submitted during the peer review process. They are not the versions of record or the final published versions. They should not be cited or distributed as the published version of this manuscript.

BMJ Open is an open access journal and the full, final, typeset and author-corrected version of record of the manuscript is available on our site with no access controls, subscription charges or pay-per-view fees (<http://bmjopen.bmj.com>).

If you have any questions on BMJ Open's open peer review process please email [editorial.bmjopen@bmj.com](mailto:editorial.bmjopen@bmj.com)

# BMJ Open

## Prevalence of and factors associated with fewer than 20 remaining teeth in adults with disabilities: A community-based study

|                                 |                                                                                                                                                                                                                             |
|---------------------------------|-----------------------------------------------------------------------------------------------------------------------------------------------------------------------------------------------------------------------------|
| Journal:                        | <i>BMJ Open</i>                                                                                                                                                                                                             |
| Manuscript ID                   | bmjopen-2017-016270                                                                                                                                                                                                         |
| Article Type:                   | Research                                                                                                                                                                                                                    |
| Date Submitted by the Author:   | 03-Feb-2017                                                                                                                                                                                                                 |
| Complete List of Authors:       | Pan, Mei-Yu ; Chang Gung University of Science and Technology - Chiayi Campus<br>Hsieh, Sung-Cheng<br>Tai, Hung-Cheng<br>Lin, Yu-Chen<br>Chen, Mei-Yen; Chang Gung University of Science and Technology, Nursing Department |
| <b>Primary Subject Heading</b>: | Dentistry and oral medicine                                                                                                                                                                                                 |
| Secondary Subject Heading:      | Nursing, Public health, Health services research                                                                                                                                                                            |
| Keywords:                       | Disabilities, number of remaining teeth, health promotion, oral hygiene                                                                                                                                                     |
|                                 |                                                                                                                                                                                                                             |

SCHOLARONE™  
Manuscripts

1  
2  
3  
4 **Prevalence of and factors associated with fewer than 20 remaining teeth in adults**  
5  
6 **with disabilities: A community-based study**  
7

8 †Mei-Yu Pan, RN, MSN, Department of Nursing, Chang Gung University of Science  
9 and Technology, Chiayi, Taiwan.

10  
11  
12 PhD, candidate, Institute of Medical Sciences, Tzu Chi University, Hualien,  
13  
14  
15  
16 Taiwan.

17 †Sung-Cheng Hsieh, PhD, Institute of Medical Sciences, Tzu Chi University, Hualien,  
18  
19  
20  
21 Taiwan.

22 Hung-Cheng Tai, Department of General Education, Chang Gung University of  
23  
24  
25  
26 Science and Technology, Chiayi, Taiwan.

27 Yu-Chen Lin, MS, RN, Director, Department of Health Promotion, Chiayi Bureau of  
28  
29  
30  
31 Health, Taiwan.

32 Mei-Yen Chen, RN, PhD, Professor, College of Nursing, Chang Gung University of  
33  
34  
35  
36 Science and Technology, Chiayi, Taiwan.

37  
38  
39 Research Fellow in Chang Gung Memorial Hospital, Chiayi, Taiwan.

40  
41  
42 Department of Nursing, Chang Gung University, Taoyuan, Taiwan.

43  
44  
45 † **Equal contribution**

46  
47  
48 **Corresponding author:**

49  
50  
51 Address Correspondence to: Mei-Yen Chen, No. 2, Chiapu Rd. West Sec., Putz City,  
52  
53  
54  
55  
56  
57  
58  
59  
60  
61  
62  
63  
64  
65  
66  
67  
68  
69  
70  
71  
72  
73  
74  
75  
76  
77  
78  
79  
80  
81  
82  
83  
84  
85  
86  
87  
88  
89  
90  
91  
92  
93  
94  
95  
96  
97  
98  
99  
100  
101  
102  
103  
104  
105  
106  
107  
108  
109  
110  
111  
112  
113  
114  
115  
116  
117  
118  
119  
120  
121  
122  
123  
124  
125  
126  
127  
128  
129  
130  
131  
132  
133  
134  
135  
136  
137  
138  
139  
140  
141  
142  
143  
144  
145  
146  
147  
148  
149  
150  
151  
152  
153  
154  
155  
156  
157  
158  
159  
160  
161  
162  
163  
164  
165  
166  
167  
168  
169  
170  
171  
172  
173  
174  
175  
176  
177  
178  
179  
180  
181  
182  
183  
184  
185  
186  
187  
188  
189  
190  
191  
192  
193  
194  
195  
196  
197  
198  
199  
200  
201  
202  
203  
204  
205  
206  
207  
208  
209  
210  
211  
212  
213  
214  
215  
216  
217  
218  
219  
220  
221  
222  
223  
224  
225  
226  
227  
228  
229  
230  
231  
232  
233  
234  
235  
236  
237  
238  
239  
240  
241  
242  
243  
244  
245  
246  
247  
248  
249  
250  
251  
252  
253  
254  
255  
256  
257  
258  
259  
260  
261  
262  
263  
264  
265  
266  
267  
268  
269  
270  
271  
272  
273  
274  
275  
276  
277  
278  
279  
280  
281  
282  
283  
284  
285  
286  
287  
288  
289  
290  
291  
292  
293  
294  
295  
296  
297  
298  
299  
300  
301  
302  
303  
304  
305  
306  
307  
308  
309  
310  
311  
312  
313  
314  
315  
316  
317  
318  
319  
320  
321  
322  
323  
324  
325  
326  
327  
328  
329  
330  
331  
332  
333  
334  
335  
336  
337  
338  
339  
340  
341  
342  
343  
344  
345  
346  
347  
348  
349  
350  
351  
352  
353  
354  
355  
356  
357  
358  
359  
360  
361  
362  
363  
364  
365  
366  
367  
368  
369  
370  
371  
372  
373  
374  
375  
376  
377  
378  
379  
380  
381  
382  
383  
384  
385  
386  
387  
388  
389  
390  
391  
392  
393  
394  
395  
396  
397  
398  
399  
400  
401  
402  
403  
404  
405  
406  
407  
408  
409  
410  
411  
412  
413  
414  
415  
416  
417  
418  
419  
420  
421  
422  
423  
424  
425  
426  
427  
428  
429  
430  
431  
432  
433  
434  
435  
436  
437  
438  
439  
440  
441  
442  
443  
444  
445  
446  
447  
448  
449  
450  
451  
452  
453  
454  
455  
456  
457  
458  
459  
460  
461  
462  
463  
464  
465  
466  
467  
468  
469  
470  
471  
472  
473  
474  
475  
476  
477  
478  
479  
480  
481  
482  
483  
484  
485  
486  
487  
488  
489  
490  
491  
492  
493  
494  
495  
496  
497  
498  
499  
500  
501  
502  
503  
504  
505  
506  
507  
508  
509  
510  
511  
512  
513  
514  
515  
516  
517  
518  
519  
520  
521  
522  
523  
524  
525  
526  
527  
528  
529  
530  
531  
532  
533  
534  
535  
536  
537  
538  
539  
540  
541  
542  
543  
544  
545  
546  
547  
548  
549  
550  
551  
552  
553  
554  
555  
556  
557  
558  
559  
560  
561  
562  
563  
564  
565  
566  
567  
568  
569  
570  
571  
572  
573  
574  
575  
576  
577  
578  
579  
580  
581  
582  
583  
584  
585  
586  
587  
588  
589  
590  
591  
592  
593  
594  
595  
596  
597  
598  
599  
600  
601  
602  
603  
604  
605  
606  
607  
608  
609  
610  
611  
612  
613  
614  
615  
616  
617  
618  
619  
620  
621  
622  
623  
624  
625  
626  
627  
628  
629  
630  
631  
632  
633  
634  
635  
636  
637  
638  
639  
640  
641  
642  
643  
644  
645  
646  
647  
648  
649  
650  
651  
652  
653  
654  
655  
656  
657  
658  
659  
660  
661  
662  
663  
664  
665  
666  
667  
668  
669  
670  
671  
672  
673  
674  
675  
676  
677  
678  
679  
680  
681  
682  
683  
684  
685  
686  
687  
688  
689  
690  
691  
692  
693  
694  
695  
696  
697  
698  
699  
700  
701  
702  
703  
704  
705  
706  
707  
708  
709  
710  
711  
712  
713  
714  
715  
716  
717  
718  
719  
720  
721  
722  
723  
724  
725  
726  
727  
728  
729  
730  
731  
732  
733  
734  
735  
736  
737  
738  
739  
740  
741  
742  
743  
744  
745  
746  
747  
748  
749  
750  
751  
752  
753  
754  
755  
756  
757  
758  
759  
760  
761  
762  
763  
764  
765  
766  
767  
768  
769  
770  
771  
772  
773  
774  
775  
776  
777  
778  
779  
780  
781  
782  
783  
784  
785  
786  
787  
788  
789  
790  
791  
792  
793  
794  
795  
796  
797  
798  
799  
800  
801  
802  
803  
804  
805  
806  
807  
808  
809  
810  
811  
812  
813  
814  
815  
816  
817  
818  
819  
820  
821  
822  
823  
824  
825  
826  
827  
828  
829  
830  
831  
832  
833  
834  
835  
836  
837  
838  
839  
840  
841  
842  
843  
844  
845  
846  
847  
848  
849  
850  
851  
852  
853  
854  
855  
856  
857  
858  
859  
860  
861  
862  
863  
864  
865  
866  
867  
868  
869  
870  
871  
872  
873  
874  
875  
876  
877  
878  
879  
880  
881  
882  
883  
884  
885  
886  
887  
888  
889  
890  
891  
892  
893  
894  
895  
896  
897  
898  
899  
900  
901  
902  
903  
904  
905  
906  
907  
908  
909  
910  
911  
912  
913  
914  
915  
916  
917  
918  
919  
920  
921  
922  
923  
924  
925  
926  
927  
928  
929  
930  
931  
932  
933  
934  
935  
936  
937  
938  
939  
940  
941  
942  
943  
944  
945  
946  
947  
948  
949  
950  
951  
952  
953  
954  
955  
956  
957  
958  
959  
960  
961  
962  
963  
964  
965  
966  
967  
968  
969  
970  
971  
972  
973  
974  
975  
976  
977  
978  
979  
980  
981  
982  
983  
984  
985  
986  
987  
988  
989  
990  
991  
992  
993  
994  
995  
996  
997  
998  
999  
1000

Address Correspondence to: Mei-Yen Chen, No. 2, Chiapu Rd. West Sec., Putz City,  
Chiayi County 61363, Taiwan. Tel: +886 (5) 3628800 ext. 2201; Fax: +886 (5)  
3628866. E-mail: [meiyen@mail.cgust.edu.tw](mailto:meiyen@mail.cgust.edu.tw)

51  
52  
53  
54  
55  
56  
57  
58  
59  
60  
61  
62  
63  
64  
65  
66  
67  
68  
69  
70  
71  
72  
73  
74  
75  
76  
77  
78  
79  
80  
81  
82  
83  
84  
85  
86  
87  
88  
89  
90  
91  
92  
93  
94  
95  
96  
97  
98  
99  
100  
101  
102  
103  
104  
105  
106  
107  
108  
109  
110  
111  
112  
113  
114  
115  
116  
117  
118  
119  
120  
121  
122  
123  
124  
125  
126  
127  
128  
129  
130  
131  
132  
133  
134  
135  
136  
137  
138  
139  
140  
141  
142  
143  
144  
145  
146  
147  
148  
149  
150  
151  
152  
153  
154  
155  
156  
157  
158  
159  
160  
161  
162  
163  
164  
165  
166  
167  
168  
169  
170  
171  
172  
173  
174  
175  
176  
177  
178  
179  
180  
181  
182  
183  
184  
185  
186  
187  
188  
189  
190  
191  
192  
193  
194  
195  
196  
197  
198  
199  
200  
201  
202  
203  
204  
205  
206  
207  
208  
209  
210  
211  
212  
213  
214  
215  
216  
217  
218  
219  
220  
221  
222  
223  
224  
225  
226  
227  
228  
229  
230  
231  
232  
233  
234  
235  
236  
237  
238  
239  
240  
241  
242  
243  
244  
245  
246  
247  
248  
249  
250  
251  
252  
253  
254  
255  
256  
257  
258  
259  
260  
261  
262  
263  
264  
265  
266  
267  
268  
269  
270  
271  
272  
273  
274  
275  
276  
277  
278  
279  
280  
281  
282  
283  
284  
285  
286  
287  
288  
289  
290  
291  
292  
293  
294  
295  
296  
297  
298  
299  
300  
301  
302  
303  
304  
305  
306  
307  
308  
309  
310  
311  
312  
313  
314  
315  
316  
317  
318  
319  
320  
321  
322  
323  
324  
325  
326  
327  
328  
329  
330  
331  
332  
333  
334  
335  
336  
337  
338  
339  
340  
341  
342  
343  
344  
345  
346  
347  
348  
349  
350  
351  
352  
353  
354  
355  
356  
357  
358  
359  
360  
361  
362  
363  
364  
365  
366  
367  
368  
369  
370  
371  
372  
373  
374  
375  
376  
377  
378  
379  
380  
381  
382  
383  
384  
385  
386  
387  
388  
389  
390  
391  
392  
393  
394  
395  
396  
397  
398  
399  
400  
401  
402  
403  
404  
405  
406  
407  
408  
409  
410  
411  
412  
413  
414  
415  
416  
417  
418  
419  
420  
421  
422  
423  
424  
425  
426  
427  
428  
429  
430  
431  
432  
433  
434  
435  
436  
437  
438  
439  
440  
441  
442  
443  
444  
445  
446  
447  
448  
449  
450  
451  
452  
453  
454  
455  
456  
457  
458  
459  
460  
461  
462  
463  
464  
465  
466  
467  
468  
469  
470  
471  
472  
473  
474  
475  
476  
477  
478  
479  
480  
481  
482  
483  
484  
485  
486  
487  
488  
489  
490  
491  
492  
493  
494  
495  
496  
497  
498  
499  
500  
501  
502  
503  
504  
505  
506  
507  
508  
509  
510  
511  
512  
513  
514  
515  
516  
517  
518  
519  
520  
521  
522  
523  
524  
525  
526  
527  
528  
529  
530  
531  
532  
533  
534  
535  
536  
537  
538  
539  
540  
541  
542  
543  
544  
545  
546  
547  
548  
549  
550  
551  
552  
553  
554  
555  
556  
557  
558  
559  
560  
561  
562  
563  
564  
565  
566  
567  
568  
569  
570  
571  
572  
573  
574  
575  
576  
577  
578  
579  
580  
581  
582  
583  
584  
585  
586  
587  
588  
589  
590  
591  
592  
593  
594  
595  
596  
597  
598  
599  
600  
601  
602  
603  
604  
605  
606  
607  
608  
609  
610  
611  
612  
613  
614  
615  
616  
617  
618  
619  
620  
621  
622  
623  
624  
625  
626  
627  
628  
629  
630  
631  
632  
633  
634  
635  
636  
637  
638  
639  
640  
641  
642  
643  
644  
645  
646  
647  
648  
649  
650  
651  
652  
653  
654  
655  
656  
657  
658  
659  
660  
661  
662  
663  
664  
665  
666  
667  
668  
669  
670  
671  
672  
673  
674  
675  
676  
677  
678  
679  
680  
681  
682  
683  
684  
685  
686  
687  
688  
689  
690  
691  
692  
693  
694  
695  
696  
697  
698  
699  
700  
701  
702  
703  
704  
705  
706  
707  
708  
709  
710  
711  
712  
713  
714  
715  
716  
717  
718  
719  
720  
721  
722  
723  
724  
725  
726  
727  
728  
729  
730  
731  
732  
733  
734  
735  
736  
737  
738  
739  
740  
741  
742  
743  
744  
745  
746  
747  
748  
749  
750  
751  
752  
753  
754  
755  
756  
757  
758  
759  
760  
761  
762  
763  
764  
765  
766  
767  
768  
769  
770  
771  
772  
773  
774  
775  
776  
777  
778  
779  
780  
781  
782  
783  
784  
785  
786  
787  
788  
789  
790  
791  
792  
793  
794  
795  
796  
797  
798  
799  
800  
801  
802  
803  
804  
805  
806  
807  
808  
809  
810  
811  
812  
813  
814  
815  
816  
817  
818  
819  
820  
821  
822  
823  
824  
825  
826  
827  
828  
829  
830  
831  
832  
833  
834  
835  
836  
837  
838  
839  
840  
841  
842  
843  
844  
845  
846  
847  
848  
849  
850  
851  
852  
853  
854  
855  
856  
857  
858  
859  
860  
861  
862  
863  
864  
865  
866  
867  
868  
869  
870  
871  
872  
873  
874  
875  
876  
877  
878  
879  
880  
881  
882  
883  
884  
885  
886  
887  
888  
889  
890  
891  
892  
893  
894  
895  
896  
897  
898  
899  
900  
901  
902  
903  
904  
905  
906  
907  
908  
909  
910  
911  
912  
913  
914  
915  
916  
917  
918  
919  
920  
921  
922  
923  
924  
925  
926  
927  
928  
929  
930  
931  
932  
933  
934  
935  
936  
937  
938  
939  
940  
941  
942  
943  
944  
945  
946  
947  
948  
949  
950  
951  
952  
953  
954  
955  
956  
957  
958  
959  
960  
961  
962  
963  
964  
965  
966  
967  
968  
969  
970  
971  
972  
973  
974  
975  
976  
977  
978  
979  
980  
981  
982  
983  
984  
985  
986  
987  
988  
989  
990  
991  
992  
993  
994  
995  
996  
997  
998  
999  
1000

**Keywords**

Disabilities; number of remaining teeth; health promotion; oral hygiene

Word count: 4202

**ABSTRACT**

**Objectives:** To examine the prevalence of and the factors associated with a number of remaining teeth (NRT) <20 among adults with disabilities.

**Design:** A community-based, cross-sectional descriptive study.

**Setting:** This study was part of a health-promotion program designed for community-dwelling adults with disabilities.

**Participants:** A total of 549 adults with disabilities aged 20–80 years, living in the community in Chiayi County in Taiwan.

**Outcome measures:** Various parameters, including NRT, oral health behaviors (i.e., oral hygiene, dietary habits, and substance use), comorbidities, disability classification, and capability for performing activities of daily living were measured. Data were statistically analyzed using descriptive statistics and multivariate logistic regression analysis.

**Results:** The mean NRT was 18.1 (SD = 10.9); 44.9% of participants had NRT <20, and 13.7% were edentulous. Most participants had poor oral hygiene: 32% reported that they seldom brushed their teeth, 83% seldom used dental floss, and 78% did not undergo regular 6-monthly dental check-ups. After adjusting for potentially confounding variables, the factors associated with the NRT <20 were: age (odds ratio [OR]: 1.07, 95% confidence interval [CI]: 1.05–1.10,  $p < 0.001$ ), comparatively lower education (OR: 1.96, 95% CI: 1.23–3.10,  $p = 0.004$ ), rare use of dental floss (OR: 2.12, 95% CI: 1.21–3.71,  $p = 0.009$ ), hypertension (OR: 1.73, 95% CI: 1.15–2.60,  $p = 0.008$ ), and intellectual disability (OR: 2.30, 95% CI: 1.30–4.08,  $p = 0.004$ ).

**Conclusions:** An NRT <20 was highly prevalent among adults with disabilities, who

1  
2  
3  
4 displayed poor oral hygiene behaviors. Adults with intellectual disabilities had greater  
5  
6 risk of an NRT <20 than those with other types of disability. In addition to  
7  
8 unmodifiable factors, the poor use of dental floss was significantly associated with an  
9  
10 NRT <20.  
11  
12

### 13 14 15 **Strengths and limitations of this study** 16

- 17 ● Few studies have reported the prevalence of and factors associated with few  
18 remaining teeth among adults with disabilities, particularly in those residing in  
19 rural areas.  
20
- 21 ● Among the different types of disability, residents with intellectual disabilities  
22 had a higher risk of an NRT <20.  
23
- 24 ● A high prevalence of an NRT <20 was identified in rural community adults with  
25 disabilities; moreover, poor oral health behaviors received limited attention  
26 from healthcare providers.  
27
- 28 ● These results highlight the value of nurse-led health promotion programs and  
29 implementation of a multidisciplinary approach for the early detection of a low  
30 NRT in rural community-dwelling adults with disabilities.  
31
- 32 ● The limitations of the study include the non-randomized sampling strategy and  
33 recruitment of individuals with disabilities that did not preclude mobility to  
34 come to the examination center may hinder generalization of our findings.  
35  
36  
37  
38  
39  
40  
41  
42  
43  
44  
45  
46  
47  
48  
49  
50  
51  
52  
53  
54  
55  
56  
57  
58  
59  
60

## INTRODUCTION

Having 20 teeth or more helps adults maintain good oral function and overall health. Teeth are recognized as calcified structures in the mouth, with the primary purpose of mastication, but act as part of the broader digestive system to help the body to obtain nutrition.<sup>1-3</sup> Other key functional aspects of teeth include speaking and communication, facial appearance, facilitating interpersonal relationships, enhancing quality of life, systemic health, cognitive function; teeth are also associated with disability status, and even with mortality.<sup>3-6</sup> Unfortunately, 3.9 billion individuals worldwide experience oral disorders, including untreated caries, severe periodontal disease, and severe tooth loss, thereby prolonging the years lived with disability.<sup>4</sup> In fact, as early as 1991, Japan conducted a series of oral campaigns called the “8020” to encourage citizens to maintain at least 20 remaining teeth through the age of 80.<sup>3</sup> Previous studies on middle-aged people also proved that the lower the number of remaining teeth (NRT), the greater the impact on individuals’ health.<sup>1,3</sup> The issue of NRT has become an important indicator for oral and overall health for adults.

Awareness of the factors associated with an NRT <20 forms the basis for good oral care. Of all the risk factors for an NRT <20, age is probably the primary factor,<sup>7-10</sup> but it is not a controllable or reversible factor. Therefore, public health professionals concentrate on the risk factors that can be modified. Other factors associated with tooth loss include sex, education, unhealthy diet, smoking, harmful alcohol consumption, poor oral hygiene, hypertension, hyperlipidemia, and diabetes mellitus,<sup>10-14</sup> but those that are specific for individuals with disabilities remain unclear.

The oral health condition of disabled individuals is often worse than that of non-disabled adults.<sup>2,15-18</sup> Utilization of oral health services is also far lower than the

1  
2  
3  
4 average for this group.<sup>15-16,19</sup> The World Health Organization has warned that as the  
5  
6 population age and chronic diseases increase, there will be an increase in the rate of  
7  
8 disability. Currently, more than a billion people worldwide (15%) live with some form  
9  
10 of disability, with 2–4% of those over the age of 15 years having significant  
11  
12 difficulties in functioning. In addition, owing to poverty and difficulties with mobility,  
13  
14 the disabled are particularly vulnerable in terms of accessing satisfactory health care  
15  
16 services. They are also more likely to engage in risky health behaviors and to be  
17  
18 affected by more complications, more comorbidities, faster degeneration, and earlier  
19  
20 mortality.<sup>20</sup> In Taiwan, there are more than 1.1 million people with disabilities (4.8%  
21  
22 of the population).<sup>21</sup> Research has shown that disabled adults rarely use oral health  
23  
24 services,<sup>22</sup> even though the government has already increased their oral care services.  
25  
26  
27 In terms of human rights, prevention of increasing levels of disability, as well as  
28  
29 reduction of caregivers' burdens, issues relating to oral health care for vulnerable  
30  
31 groups deserve much attention.  
32  
33  
34

35  
36 However, although some previous studies have focused on  
37  
38 institution-accommodated adults with disabilities,<sup>2,17</sup> fewer reports have discussed  
39  
40 disabled individuals living in rural communities. Moreover, although single group of  
41  
42 disabilities has been discussed,<sup>17,23-24</sup> existing reports do not focus on diverse  
43  
44 disability categories.<sup>15-16</sup> With these issues in mind, differences between the disabled  
45  
46 and non-disabled in terms of oral hygiene, such as limitations in self-care ability, and  
47  
48 factors potentially relevant to oral health should be recognized by health care  
49  
50 providers. Therefore, the aim of this study was to explore the prevalence of and  
51  
52 factors associated with an NRT <20 among adults with various disabilities in Taiwan.  
53  
54

## 55 56 **METHODS** 57 58 59 60

### Design, sample, and setting

This study, which was part of a health-promotion program designed for community-dwelling adults with disabilities, was led by a nursing team in collaboration with a district hospital and the Bureau of Health Promotion of Chiayi County in Taiwan.<sup>25</sup> In Chiayi County, visual impairment, hearing impairment, intellectually disability, and physical disability affect more than 38,800 individuals, accounting for 64% of the local disabled population. This paper is part of a series of reports regarding health issues of community-based people with disabilities. A community-based health screening survey was conducted between July and December of 2013 using a cross-sectional descriptive design.

Participants were selected through convenience sampling from the registry of the government social welfare center.<sup>21</sup> The inclusion criteria were: (1) adults certified with either visual impairment, hearing impairment, mental illness, or physical disability; (2) age  $\geq 20$  years; (3) ability to complete the written questionnaire in either Mandarin or Taiwanese, with assistance from the interviewers; (4) ability to walk to the examination center with/without help; and (5) ability to sign the consent forms prior to recruitment. Exclusion criteria were an inability to answer questions or having a serious disease, such as dialysis or cancer.

### Measurements

1. *Number of remaining teeth (NRT)*: The NRT was obtained by research assistants by asking the participants to open his/her mouths and then counting the total number of natural teeth and fixed dentures, after discharging the removable dentures in the oral cavities. Root fragments without a crown were excluded.
2. *Oral health behaviors*: Oral health behaviors were measured in terms of seven habits, viz., brushing teeth, using dental floss, visiting dentists or undergoing



1  
2  
3  
4 dental scaling, drinking alcohol, smoking, five groups of nutrition, and water  
5 intake. This information was collected through standardized personal interviews  
6 using a structured questionnaire that was based on the published literature.<sup>7, 10</sup> In  
7 this study, answers regarding the brushing of teeth were categorized as frequent  
8 ( $\geq$ twice a day) vs. infrequent ( $<$ twice a day). As for immediate brushing teeth after  
9 a meal, participants were classified as “often” if they responded with “usually” or  
10 “frequently”, or “seldom” if they responded with “never” or “sometimes”. For  
11 using dental floss, responses were classified as “often” if dental floss was used to  
12 clean interdental spaces  $\geq$ once a day, or “seldom” if the respondents’ answer was  
13 “never” or “sometimes.” Regarding visits to dentists, participants were classified  
14 as “regular” if they visited dentists and underwent scaling every 6 months, or  
15 “irregular” if they responded “never” or “sometimes.” For questions “Do you  
16 smoke cigarettes or drink alcohol?”, participants were classified as “none or  
17 formerly” if they had never engaged in these behaviors or had stopped doing so  
18 for 1 year, or as “current users.” Regarding five groups of nutrition intake, the  
19 response was considered “balanced” if the respondents usually or always had five  
20 groups of nutrition (i.e., meat, milk, grains, vegetables, and fruit) each day, or  
21 “unbalanced” if they never or sometimes had these foods. In terms of water intake,  
22 answers were categorized as sufficient ( $\geq$ 1500 mL per day) vs. insufficient ( $<$  1500  
23 mL per day).

- 24  
25  
26  
27  
28  
29  
30  
31  
32  
33  
34  
35  
36  
37  
38  
39  
40  
41  
42  
43  
44  
45  
46  
47  
48  
49 3. *Demographic characteristics:* We obtained data on age, sex, educational  
50 attainment (years of education received, or level of school completed), disability  
51 classification, capability of activity of daily living (ADL), and the prevalence of  
52 three common chronic diseases (i.e., hypertension, diabetes mellitus, and  
53 hyperlipidemia). Specific disabilities such as physical, hearing, vision, or  
54  
55  
56  
57  
58  
59  
60

1  
2  
3  
4 intellectual disabilities, according to the Taiwanese government's definitions,<sup>21</sup>  
5  
6 were identified and confirmed prior to the interviews. ADL capability, judged  
7  
8 using the Barthel ADL Index of feeding, grooming, bathing, mobility, toilet use,  
9  
10 transfer, etc., reflected the dependence level of participants who required external  
11  
12 assistance to complete these activities. "Independent" was coded if external  
13  
14 assistance was unnecessary, or "dependent" if it was needed. Moreover, the three  
15  
16 common chronic diseases were assessed using a medical history diagnosed by a  
17  
18 physician and/or physiological biomarkers including blood pressure (BP), fasting  
19  
20 blood glucose (FBG), triglyceride (TG), total cholesterol (TC), low-density  
21  
22 lipoprotein (LDL) cholesterol, and (high-density lipoprotein (HDL) cholesterol  
23  
24 levels. Following the national standard of the Ministry of Health and Welfare,<sup>26</sup>  
25  
26 blood samples were evaluated and BP was measured at the time of the study,  
27  
28 applying standard procedures. The three common chronic diseases were defined as  
29  
30 (1) diabetes mellitus (FBG  $\geq 126$  mg/dL, or if ever diagnosed by a doctor); (2)  
31  
32 hypertension (systolic/diastolic BP  $\geq 140/90$  mmHg, or if ever diagnosed by a  
33  
34 doctor); and (3) hyperlipidemia (LDL  $\geq 160$  mg/dL, TC  $\geq 240$  mg/dL, TG  $\geq 200$   
35  
36 mg/dL, or if ever diagnosed by a doctor).  
37  
38  
39  
40  
41

### 42 **Procedures and ethical considerations**

43  
44 This study was approved by the relevant institutional review boards, and all  
45  
46 procedures complied with the ethical guidelines. Participants were invited to  
47  
48 participate in the study via letters sent by the public health nurses, and were fully  
49  
50 informed about the purposes of the study. The letter emphasized the confidentiality of  
51  
52 all collected data. Written consent forms were appropriately explained to and signed  
53  
54 by participants and/or their guardians before arranging free medical evaluations.  
55  
56 These evaluations, including blood sampling and physical check-ups, were conducted  
57  
58  
59  
60

1  
2  
3  
4 by the local hospital staff on a weekend, in a school auditorium, followed by  
5  
6 individual interviews. To create a caring and friendly environment, each participant  
7  
8 was accompanied by a community volunteer during the health screenings. If a  
9  
10 participant were not an effective responder, his/her familiar caregiver was allowed to  
11  
12 represent the participant with proper authorization.  
13

14  
15 The NRT was calculated carefully by research assistants who were trained by a  
16  
17 research team including the investigators and a dentist. Details of the interviews and  
18  
19 measurement procedures have been reported in our previous study.<sup>10</sup> Face and content  
20  
21 validity of the instrument were judged to be good (0.88–0.91) by a panel of five  
22  
23 experts: a faculty member in public health and health education, a dentist, a social  
24  
25 worker in a disabled institution, and two nursing faculty members who specialize in  
26  
27 the field of long-term care.  
28  
29

### 30 31 **Statistical analyses**

32  
33 Quantitative data were analyzed using SPSS v. 22.0 software. Descriptive  
34  
35 statistical data are presented as numbers and percentages for categorical variables, and  
36  
37 as means  $\pm$  standard deviations for continuous variables. Comparisons of  
38  
39 demographic characteristics, comorbidities, and oral health behaviors between those  
40  
41 with fewer teeth (NRT <20) or more teeth (NRT  $\geq$ 20) were performed using  
42  
43 chi-square test for categorical variables and using independent sample *t*-test for  
44  
45 continuous variables, as univariate analyses.  
46  
47

48  
49 For those data without a normal distribution, the Mann–Whitney U test was  
50  
51 applied to compare inter-group differences. Moreover, the factors associated with  
52  
53 fewer teeth (NRT <20) were included in a multivariable logistic regression analysis  
54  
55 with forward stepwise selection of all the variables that were found to be significant in  
56  
57 univariate analyses. All statistical assessments adopted two-tailed tests, and the  
58  
59  
60

p-value cut-off point for statistical significance was set as 0.05.

## RESULTS

Of the 549 participants enrolled in this analysis, 18 failed to complete the NRT measurement. The majority of the participants were male (54.3%), aged 20–80 years (mean age: 58.8, SD: 13.9), and were not well-educated (67.4% had  $\leq 9$  years of educational attainment), and the distribution of disabilities by type was as follows: physical (55.9%), intellectual (19.7%), hearing (15.7%), and vision (8.7%). Most participants (88.7%) did not require assistance in the activities of daily living (ADL), as they only had a mild degree of disability. In addition, the prevalence rates of hypertension, hyperlipidemia, and diabetes mellitus were 56.5%, 49.9%, and 23.9%, respectively (Table 1).

As shown in Table 2, the participants' mean NRT was 18.1 (SD: 10.9), and 44.8% had an NRT  $< 20$ , including 13.7% extreme cases who were edentulous (NRT = 0). In terms of oral health behaviors, 77.4% had almost never brushed their teeth after meals, and 83.4% had no habit of using dental floss daily to clean the crevices between teeth. The participants' mean tooth brushing frequency was 1.8 (SD: 0.9) times per day; 32.2% responded that they seldom brushed their teeth twice a day. Most (78.0%) did not visit the dentist for regular inspections and dental scaling on a 6-monthly basis. Over 40% reported insufficient water intake or unbalanced nutrition. Additionally, current habits of smoking and drinking alcohol were present in 25.3% and 16.2% of participants, respectively.

Table 1. Demographic characteristics of the subjects

| Variable | N (%)      | Mean $\pm$ SD |
|----------|------------|---------------|
| Gender   |            |               |
| Male     | 298 (54.3) |               |
| Female   | 251 (45.7) |               |

|                            |            |            |
|----------------------------|------------|------------|
| Age (years)                |            | 58.8± 13.9 |
| <65                        | 331 (60.3) |            |
| ≥65                        | 218 (39.7) |            |
| Educational attainment     |            |            |
| ≤9 years                   | 370 (67.4) |            |
| >9 years                   | 179 (32.6) |            |
| Disability classification  |            |            |
| Physical disability        | 307 (55.9) |            |
| Vision impairment          | 48 (8.7)   |            |
| Hearing impairment         | 86 (15.7)  |            |
| Intellectual disability    | 108 (19.7) |            |
| Capability of ADL (n=548)* |            |            |
| Dependent                  | 62 (11.3)  |            |
| Independent                | 486 (88.7) |            |
| Hypertension               |            |            |
| Yes                        | 310 (56.5) |            |
| No                         | 239 (43.5) |            |
| Diabetes mellitus          |            |            |
| Yes                        | 131 (23.9) |            |
| No                         | 418 (76.1) |            |
| Hyperlipidemia             |            |            |
| Yes                        | 274 (49.9) |            |
| No                         | 275 (50.1) |            |

ADL, activities of daily living; \*due to missing data

Table 2. Number of remaining teeth and oral health behaviors

| Variables                     | n (%)      | Mean ± SD   |
|-------------------------------|------------|-------------|
| Group of NRT (n=531) *        |            | 18.1 ± 10.9 |
| 0                             | 73 (13.7)  |             |
| 1-19                          | 165 (31.1) |             |
| 20-29                         | 215 (40.5) |             |
| ≥30                           | 78 (14.7)  |             |
| Oral hygiene                  |            |             |
| Times of daily brushing teeth |            | 1.8 ± 0.9   |
| ≥2                            | 372 (67.8) |             |

|                               |                            |            |
|-------------------------------|----------------------------|------------|
|                               | <2                         | 177 (32.2) |
| Brushing teeth after meal     |                            |            |
|                               | Often                      | 124 (22.6) |
|                               | Seldom                     | 425 (77.4) |
| Using dental floss            |                            |            |
|                               | Often ( $\geq$ once a day) | 91 (16.6)  |
|                               | Seldom (<once a day)       | 458 (83.4) |
| Visiting dentist per 6 months |                            |            |
|                               | Regular                    | 121 (22.0) |
|                               | Irregular                  | 428 (78.0) |
| Water intake (ml/ per day)    |                            |            |
|                               | $\geq$ 1500                | 328 (59.7) |
|                               | <1500                      | 221 (40.3) |
| 5 groups of nutrition per day |                            |            |
|                               | Balanced                   | 328 (59.7) |
|                               | Unbalanced                 | 221 (40.3) |
| Smoking habit                 |                            |            |
|                               | Never or formerly          | 410 (74.7) |
|                               | Current users              | 139 (25.3) |
| Alcohol habit                 |                            |            |
|                               | Never or formerly          | 460 (83.8) |
|                               | Current users              | 89 (16.2)  |

---

NRT, number of remaining teeth; \*due to missing data

Table 3. Univariate analysis of factors associated with number of remaining teeth

| Variables                              | NRT $\geq$ 20<br>(n =293) | NRT<20<br>(n=238) | P*     |
|----------------------------------------|---------------------------|-------------------|--------|
| Age (years)                            | 55 (44-63)                | 67 (58-74)        | <0.001 |
| Female gender                          | 123 (42.0)                | 121 (50.8)        | 0.042  |
| Education $\leq$ 9 years               | 161 (54.9)                | 195 (81.9)        | <0.001 |
| Disability classification              |                           |                   | 0.109  |
| Physical disability                    | 166 (56.7)                | 131 (54.8)        |        |
| Vision impairment                      | 19 (6.5)                  | 28 (11.8)         |        |
| Hearing impairment                     | 44 (15.0)                 | 39 (16.4)         |        |
| Intellectual disability                | 64 (21.8)                 | 40 (16.8)         |        |
| ADL dependent                          | 30 (10.2)                 | 28 (11.8)         | 0.575  |
| Hypertension                           | 139 (47.4)                | 161 (67.6)        | <0.001 |
| Diabetes mellitus                      | 58 (19.8)                 | 70 (29.4)         | 0.010  |
| Hyperlipidemia                         | 155 (52.9)                | 113 (47.5)        | 0.214  |
| Oral health behaviors                  |                           |                   |        |
| Infrequent brushing teeth <sup>#</sup> | 89 (30.4)                 | 78 (32.8)         | 0.554  |
| Seldom using dental floss <sup>†</sup> | 226 (77.1)                | 214 (89.9)        | <0.001 |
| Irregularly visit dentist              | 220 (75.1)                | 193 (81.1)        | 0.098  |
| Insufficient water intake              | 107 (36.5)                | 105 (44.1)        | 0.075  |
| Unbalanced nutrition                   | 102 (34.8)                | 107 (45.0)        | 0.017  |
| Smoking habit                          | 75 (25.6)                 | 59 (24.8)         | 0.831  |
| Alcohol habit                          | 48 (16.4)                 | 36 (15.1)         | 0.693  |

NRT, number of remaining teeth; ADL, activities of daily living.

Data are expressed as median (interquartile range) or number (percent).

\* Mann-Whitney U test for age; Pearson's chi-square test for others.

<sup>#</sup> Infrequent brushing teeth: < 2 times/day.

<sup>†</sup> Seldom using dental floss: < 1 time/day.

Table 4. Multivariate logistic regression of the factors associated with NRT &lt; 20

| Variables                 | OR   | 95% CI    | <i>P</i> |
|---------------------------|------|-----------|----------|
| Disability classification |      |           |          |
| Vision impairment         | 1.48 | 0.72-3.04 | 0.290    |
| Hearing impairment        | 0.75 | 0.43-1.32 | 0.316    |
| Intellectual disability   | 2.30 | 1.30-4.08 | 0.004    |
| Physical disability*      |      |           |          |
| Using dental floss        |      |           |          |
| Seldom (<once a day)      | 2.12 | 1.21-3.71 | 0.009    |
| Often (≥once a day) *     |      |           |          |
| Educational attainment    |      |           |          |
| ≤ 9 years                 | 1.96 | 1.23-3.10 | 0.004    |
| >9 years*                 |      |           |          |
| Hypertension              |      |           |          |
| Yes                       | 1.73 | 1.15-2.60 | 0.008    |
| No*                       |      |           |          |
| Age                       | 1.07 | 1.05-1.10 | <0.001   |

NRT, number of remaining teeth; OR, odds ratio; CI, confidence interval.

Adjusted for all variables of the table 3 in model. \* Reference group.

Chi-square and Mann–Whitney U test results (Table 3) indicated that participants with the characteristics of increased age, female sex, less than 9 years' educational attainment, histories of hypertension and/or diabetes, rare use of dental floss, or unbalanced nutrition had significantly greater likelihoods of having an NRT <20 (all *p* values < 0.05). Although these participants were not significantly affected by a particular disability (*p* = 0.109), those with vision impairment seemed to have a higher probability of having an NRT <20 than an NRT ≥20.

Further analysis via multivariate logistic regression (Table 4), after adjusting for potential confounders (including all variables in Table 3), revealed that participants with intellectual disability were at higher risk of losing teeth than those with physical



1  
2  
3  
4 disability (odds ratio [OR]: 2.30, 95% confidence interval [CI]: 1.30–4.08). The other  
5  
6 associated risk factors of NRT <20 were age (OR: 1.07, 95% CI: 1.05–1.10),  
7  
8 comparatively lower education (OR: 1.96, 95% CI: 1.23–3.10), rare use of dental  
9  
10 floss (OR: 2.12, 95% CI: 1.21–3.71), and a history of hypertension (OR: 1.73, 95%  
11  
12 CI: 1.15–2.60).  
13  
14

## 15 16 **DISCUSSION**

17  
18 This study featured a nurse-led health program for promoting the oral health of  
19  
20 disabled individuals. Four key findings emerged: first, fewer teeth were counted and  
21  
22 there was a higher prevalence of an NRT <20 for disabled participants. According to  
23  
24 previous reports, the average NRT for non-disabled people is approximately 25,<sup>10</sup> and  
25  
26 only 16% of these individuals have an NRT <20.<sup>2, 10</sup> However, in this study, the  
27  
28 average NRT in disabled individuals was 18, and 44.8% had an NRT <20, which  
29  
30 indicated a significantly worse oral health condition. The literature supports the view  
31  
32 that adults with disabilities commonly experience the problem of poor oral hygiene  
33  
34 and have fewer NRT than non-disabled people, owing to their limited capabilities, in  
35  
36 terms of cognitive comprehension, body coordination, or muscle power.<sup>11, 18</sup> In fact,  
37  
38 the prevalence of NRT <20 in this study was not only higher than the figures  
39  
40 previously reported for non-disabled people, but was also higher than that reported in  
41  
42 a Belgian study of people with disabilities (33%).<sup>2</sup> Moreover, the edentulous rate of  
43  
44 13.7% found in this study was also higher than the edentulous rate of 8.9% reported  
45  
46 by a study conducted in the USA.<sup>15</sup>  
47  
48  
49  
50

51  
52 Second, most disabled participants reported having inadequate oral hygiene  
53  
54 behaviors in general. These behaviors, including rarely brushing teeth after meals,  
55  
56 seldom using dental floss, and irregular dental visits and scaling, were the factors  
57  
58  
59  
60

1  
2  
3  
4 associated with tooth loss in previous reports,<sup>1, 7-8</sup> and may also affect other systemic  
5 diseases.<sup>5</sup> The prevalence of these behaviors in this study was 77.4%, 83.4%, and  
6  
7  
8  
9 78.0%, respectively, which was much higher than in the non-disabled population  
10  
11 (about 28–70%),<sup>7, 10, 14-16</sup> and were also greater than those in disabled individuals in  
12  
13 other countries (29–51%).<sup>15,19</sup> Although irregular dental visits were not a significant  
14  
15 factor for an NRT <20 in the current study, most previous studies indicated the  
16  
17 importance of regular dental care.<sup>1, 24, 27</sup> As individuals with disabilities typically do  
18  
19 not visit dentists until their dental problems become too serious to be treated, tooth  
20  
21 extraction is often unavoidable. The issue of regular dental visits to help maintain a  
22  
23 greater number of teeth in the disabled should be explored in future.  
24  
25

26  
27 Third, adults with intellectual disability have a high risk of having an NRT <20. In  
28  
29 comparison with physical disabilities, the subgroup of individuals with intellectual  
30  
31 disabilities was found to be afflicted with severe oral diseases more commonly than  
32  
33 the other sub-groups. This group was at higher risk of having fewer teeth, which is  
34  
35 consistent with findings of previous studies.<sup>2,9,17</sup> Lindsay<sup>28</sup> attributes this phenomenon  
36  
37 to their preferences for eating desserts, sweets, and drinking soft drinks; similarly,  
38  
39 their reduced capacity for self-control owing to their cognitive impairments could also  
40  
41 modulate this effect. These individuals often are not fully capable of independent  
42  
43 self-care, and their caregivers may find it difficult to perform oral hygiene activities  
44  
45 for them over the long run. In addition, adults with developmental disabilities often  
46  
47 appear to have disorders, such as gastro-esophageal reflux disease, excessive  
48  
49 salivation, induced xerostomia triggered by antiepileptic medications, etc., which  
50  
51 could increase their risk of poor oral health.  
52  
53  
54

55  
56 Fourth, the use of dental floss is a modifiable factor associated with the NRT.  
57  
58 Except for intellectual disabilities, the other associated factors, such as aging,  
59  
60

1  
2  
3  
4 lower-level of education,<sup>8 10</sup> hypertension,<sup>10 12</sup> and rare use of dental floss, are similar  
5  
6 to the factors associated with NRT in non-disabled individuals. Among these, dental  
7  
8 floss instruction is the most malleable component that can be addressed by public  
9  
10 health practitioners. This study found that most disabled adults (77.4%) lacked the  
11  
12 habit of cleaning teeth after meals, and brushed their teeth less than twice a day. The  
13  
14 practice of dental flossing may be a complementary oral hygiene step that can help to  
15  
16 maintain the NRT. A previous systematic review has confirmed that brushing and  
17  
18 flossing can significantly reduce plaque and gingivitis as compared with tooth  
19  
20 brushing alone.<sup>13</sup>  
21  
22  
23

24 It is the presence of dental plaque and food debris in the crevices between the  
25  
26 teeth that encourage bacteria to flourish, activating the inflammatory response and the  
27  
28 innate immune system in the human body. These bacteria induce swelling and  
29  
30 bleeding of the gums, the destruction of periodontal tissues and alveolar bones, and  
31  
32 the promotion of tooth mobility; thus, ultimately causing tooth loss.<sup>29-30</sup> The findings  
33  
34 from some systematic reviews and animal experiments suggest that oral hygiene  
35  
36 methods, such as tooth brushing, dental flossing, and/or interdental brushing are all  
37  
38 effective means of extinguishing the periodontal pathogens thriving in the buccal  
39  
40 cavity<sup>13, 31-32</sup> and even in the blood.<sup>33</sup>  
41  
42  
43

44 However, people with disabilities may have difficulties flossing owing to  
45  
46 disability-related issues with self-control, movement coordination, comprehension,  
47  
48 etc., although nearly 90% of them in this study were categorized as having basic  
49  
50 self-care ability in ADL. Adopting a habit of dental flossing, and accuracy and  
51  
52 thoroughness of dental cleaning processes, may even be demanding for some  
53  
54 non-disabled people, as well as for adults with disabilities. The assistance of  
55  
56 interdental brushing, which is recognized as an easier and more effective method for  
57  
58  
59  
60

1  
2  
3  
4 reducing periodontal pathogens,<sup>31</sup> can also be considered as an alternative.  
5

6  
7 To address the problem of NRT <20, oral hygiene instruction, a commonly used  
8 clinical technique, is imperative for improving oral hygiene. Since disabled adults  
9 may not cope with regular dental visits and examinations, integration of preventive  
10 and corrective oral health in their lives is highly beneficial.<sup>24</sup> Routine daily teeth  
11 cleaning is undoubtedly the most economic and convenient approach to ensure oral  
12 health. It can also reduce the fear of individuals with disabilities about accessing oral  
13 health services, and even shorten the scaling time required.<sup>34</sup> Unfortunately, previous  
14 studies have demonstrated that community-dwelling individuals with disabilities have  
15 worse oral health than those living in institutions.<sup>23</sup> Since these participants were  
16 living at home with relatives, their families were generally more concerned with  
17 physiological diseases than with oral conditions, and were not aware of the  
18 importance of oral hygiene. Teeth cleaning was also typically perceived as the  
19 individuals' own responsibility, as these disabled people generally seemed to be  
20 capable of managing the task. However, they had a higher prevalence of an NRT <20,  
21 which may imply that even if the participants had basic self-care ability, it does not  
22 mean that are capable of achieving good quality oral hygiene. Their families  
23 sometimes opted to ignore these "trivial" matters, as they were already exhausted by  
24 the burden of care. Consequently, without professional guidance and tracking, daily  
25 cleaning of the teeth becomes a difficult task for community-based people with  
26 disabilities. A systematic review has concluded that additional oral hygiene instruction  
27 could help cultivate a higher quality of oral health behaviors; thus, ameliorating  
28 gingivitis and eradicating dental plaque.<sup>27</sup>  
29  
30  
31  
32  
33  
34  
35  
36  
37  
38  
39  
40  
41  
42  
43  
44  
45  
46  
47  
48  
49  
50  
51  
52  
53  
54

55 As many researchers claim that good oral health can improve almost every  
56 aspect of life, from overall health to self-esteem, communication, nutrition, quality of  
57  
58  
59  
60

1  
2  
3  
4 life, savings in medical expenses, and finding employment, for people with  
5 disabilities, in addition to relieving the burden on their care givers.<sup>16, 35</sup> To achieve the  
6 oral health goal of 8020, more resources and attention should be invested to provide  
7 good oral care matched to the individual's disability characteristics. Further  
8 integration of the social welfare networks, oral hygiene instructions, and coordination  
9 of medical professionals and caregivers for adults with disabilities are recommended.

### 17 **Limitations**

19  
20 This study has some limitations. First, the participants' oral conditions were  
21 examined by research assistants, rather than by qualified dentists, owing to constraints  
22 on the participants' cooperation and expectations. Only superficial features, such as  
23 the remaining number of natural and filled teeth were investigated; other thorough  
24 evaluations, such as those of caries and periodontal tissues, were not performed. Thus,  
25 potential oral problems may have been ignored or underestimated by the NRT figures  
26 reported here. Second, some selection bias may have been involved as the criteria for  
27 inclusion included the ability to travel from home to the nearby school where the  
28 examinations were conducted. The participants were mostly categorized as having  
29 mild disabilities, with limited variation. Their oral health conditions should thus be  
30 presumed to be generally better than those of individuals with more severe  
31 disabilities,<sup>22</sup> who were not included in this survey. The real situation of oral health  
32 for adults with disabilities may thus be even worse than that indicated by this study.  
33 Third, subjects with visual impairments constituted only 8.7% of all the participants,  
34 thus comprising a minor sub-group as compared with other disabilities. Thus, the  
35 findings regarding the prevalence of reduced dentition in this sub-group needs to be  
36 viewed with caution. Fourth, the participants were conveniently recruited from one  
37 location, rather than by nationwide cluster sampling. The generalizability of the study  
38  
39  
40  
41  
42  
43  
44  
45  
46  
47  
48  
49  
50  
51  
52  
53  
54  
55  
56  
57  
58  
59  
60

1  
2  
3  
4 results may therefore be limited.  
5

## 6 7 **CONCLUSION**

8  
9 For community-dwelling individuals with disabilities, living in rural areas, the  
10 prevalence of an NRT <20 was significantly greater than that reported in previous  
11 studies. Poor oral hygiene behaviors were identified as being a general characteristic  
12 of the participants. In particular, those with intellectual disabilities had higher risks of  
13 tooth loss than did those with other types of disabilities. Excluding unmodifiable  
14 factors, such as age, education level, disability classification, and hypertension, an  
15 NRT <20 in disabled adults was strongly associated with the habit of seldom using  
16 dental floss. As oral hygiene instructions are the least expensive and easiest way of  
17 integrating preventative intervention options for chronic diseases into daily activities,  
18 professionals should concentrate on this approach for individuals with disabilities and  
19 attempt to enhance their teeth cleaning awareness and capabilities. Finally, to satisfy  
20 the oral health needs of community-dwelling adults with disabilities, issues such as  
21 the risk factors associated with different types of disabilities, regular dental visits, and  
22 their particular requirements can be further explored.  
23  
24  
25  
26  
27  
28  
29  
30  
31  
32  
33  
34  
35  
36  
37  
38

## 39 **Conflict of interest**

40  
41  
42 The authors declare that they have no competing interests.  
43

## 44 **Authors' contributions**

45  
46 MYP and TCH: designing the study, collecting and analyzing data, and drafting the  
47 paper. HCT and YCL: proofreading and revising the manuscripts. MYC: initializing,  
48 conceptualizing, and supervising the research process. All authors have read and  
49 approved the final manuscript.  
50  
51  
52  
53  
54

## 55 **Acknowledgments**

56  
57 We thank all participants in this study and staff at the Chiayi Bureau of Health  
58  
59  
60

Promotion for their support, which made this study possible.

### **Funding**

The study was supported by a grant from the Chiayi Bureau of Health Promotion (GZRPF3C0191) and Chang Gung Memorial Hospital (BMRP 148).

### **Patient consent**

Obtained

### **Ethics approval**

This study was approved by the institutional review board of the ethical committee of Chang Gung Memorial Hospital (IRB 102-3331B)

### **References**

1. Wang TF, Chen YY, Liou YM, et al. Investigating tooth loss and associated factors among older Taiwanese adults. *Arch Gerontol Geriatr* 2014;58(3):446-53.
2. Leroy R, Declerck D. Objective and subjective oral health care needs among adults with various disabilities. *Clin Oral Investig* 2013;17(8):1869-78.
3. Yamanaka K, Nakagaki H, Morita I, et al. Comparison of the health condition between the 8020 achievers and the 8020 non-achievers. *Int Dent J* 2008;58(3):146-50.
4. Marcenes W, Kassebaum NJ, Bernabe E, et al. Global burden of oral conditions in 1990-2010: a systematic analysis. *J Dent Res* 2013;92(7):592-7.
5. Linden GJ, Lyons A, Scannapieco FA. Periodontal systemic associations: review of the evidence. *J Clin Periodontol* 2013;40(14):S8-19.
6. Hayasaka K, Tomata Y, Aida J, et al. Tooth loss and mortality in elderly japanese adults: effect of oral care. *J Am Geriatr Soc* 2013;61(5):815-20.
7. Huang JC, Peng YS, Fan JY, et al. Factors associated with numbers of remaining

- 1  
2  
3  
4 teeth among type 2 diabetes: a cross-sectional study. *J Clin Nurs*  
5  
6 2013;22(13-14):1926-32.  
7  
8  
9 8. Hsu KJ, Yen YY, Lan SJ, et al. Impact of oral health behaviours and oral habits  
10 on the number of remaining teeth in older Taiwanese dentate adults. *Oral Health*  
11  
12 *Prev Dent* 2013;11(2):121-30.  
13  
14 9. Mac Giolla Phadraig C, McCallion P, Cleary E, et al. Total tooth loss and  
15 complete denture use in older adults with intellectual disabilities in Ireland. *J*  
16  
17 *Public Health Dent* 2015;75(2):101-8.  
18  
19 10. Tsai SJ, Lin MS, Chiu WN, et al. Factors associated with having less than 20  
20 natural teeth in rural adults: a cross-sectional study. *BMC Oral Health*  
21  
22 2015;15:158.  
23  
24 11. Jiang Y, Okoro CA, Oh J, et al. Sociodemographic and health-related risk factors  
25 associated with tooth loss among adults in Rhode Island. *Prev Chronic Dis*  
26  
27 2013;10:E45.  
28  
29 12. Yoshino K, Ito K, Kuroda M, et al. Tooth loss in problem-oriented, irregular, and  
30 regular attenders at dental offices. *Bull Tokyo Dent Coll* 2016;57(1):11-9.  
31  
32 13. Sambunjak D, Nickerson Jason W, Poklepovic T, et al. Flossing for the  
33 management of periodontal diseases and dental caries in adults. *Cochrane*  
34  
35 *Database Syst Rev* 2011(12):CD008829.  
36  
37 14. Islas-Granillo H, Borges-Yanez A, Medina-Solis CE, et al. Tooth-loss  
38 experience and associated variables among adult mexicans 60 years and older. *P*  
39  
40 *R Health Sci J* 2016;35(2):88-92.  
41  
42 15. Armour BS, Swanson M, Waldman HB, et al. A profile of state-level differences  
43 in the oral health of people with and without disabilities, in the U.S., in 2004.  
44  
45 *Public Health Rep* 2008;123(1):67-75.  
46  
47  
48  
49  
50  
51  
52  
53  
54  
55  
56  
57  
58  
59  
60



- 1  
2  
3  
4 16. Hall JP, Chapman SL, Kurth NK. Poor oral health as an obstacle to employment  
5 for Medicaid beneficiaries with disabilities. *J Public Health Dent*  
6  
7 2013;73(1):79-82.  
8
- 9  
10  
11 17. Oliveira JS, Prado Júnior RR, de Sousa Lima KR, et al. Intellectual disability and  
12 impact on oral health: a paired study. *Special Care in Dentistry*  
13  
14 2013;33(6):262-8.  
15
- 16  
17  
18 18. Ameer N, Palaparathi R, Neerudu M, et al. Oral hygiene and periodontal status of  
19 teenagers with special needs in the district of Nalgonda, India. *J Indian Soc*  
20  
21  
22  
23  
24  
25  
26  
27  
28  
29  
30  
31  
32  
33  
34  
35  
36  
37  
38  
39  
40  
41  
42  
43  
44  
45  
46  
47  
48  
49  
50  
51  
52  
53  
54  
55  
56  
57  
58  
59  
60  
20  
21  
22  
23  
24  
25  
26  
27  
28  
29  
30  
31  
32  
33  
34  
35  
36  
37  
38  
39  
40  
41  
42  
43  
44  
45  
46  
47  
48  
49  
50  
51  
52  
53  
54  
55  
56  
57  
58  
59  
60  
*Periodontol* 2012;16(3):421-5.
19. Havercamp SM, Scott HM. National health surveillance of adults with  
disabilities, adults with intellectual and developmental disabilities, and adults  
with no disabilities. *Disabil Health J* 2015;8(2):165-72.
20. World Health Organization (WHO). *Disabilities*.  
<http://www.who.int/topics/disabilities/en/>. (accessed 28 December 2016)
21. Ministry of Health and Welfare, Tawian. *Statistics of General Health and*  
*Welfare*. [http://www.mohw.gov.tw/EN/Ministry/Statistic.aspx?f\\_list\\_no=474](http://www.mohw.gov.tw/EN/Ministry/Statistic.aspx?f_list_no=474).  
(accessed 28 January 2017)
22. Lai H-T, Kung P-T, Su H-P, et al. Examining related influential factors for  
dental calculus scaling utilization among people with disabilities in Taiwan, a  
nationwide population-based study. *Res Dev Disabil* 2014;35(9):2231-40.
23. Morgan JP, Minihan PM, Stark PC, et al. The oral health status of 4,732 adults  
with intellectual and developmental disabilities. *J Am Dent Assoc*  
2012;143(8):838-46.
24. Gabre P, Martinsson T, Gahnberg L. Longitudinal study of dental caries, tooth  
mortality and interproximal bone loss in adults with intellectual disability. *Eur J*

- 1  
2  
3  
4  
5  
6  
7  
8  
9  
10  
11  
12  
13  
14  
15  
16  
17  
18  
19  
20  
21  
22  
23  
24  
25  
26  
27  
28  
29  
30  
31  
32  
33  
34  
35  
36  
37  
38  
39  
40  
41  
42  
43  
44  
45  
46  
47  
48  
49  
50  
51  
52  
53  
54  
55  
56  
57  
58  
59  
60
- Oral Sci* 2001;109(1):20-6.
25. Chen P-H, Chen C-Y, Lin Y-C, et al. Low bone mineral density among adults with disabilities in Taiwan: A cross-sectional descriptive study. *Disabil Health J* 2015;8(4):635-41.
26. Health Promotion Administration, Ministry of Health and Welfare. *Survey on the prevalence of hypertension, hyperglycemia and hyperlipidemia in Taiwan*. <http://www.hpa.gov.tw/BHPNet/Web/HealthTopic/Topic.aspx?id=201409290001>. (accessed 28 January 2017)
27. Worthington Helen V, Clarkson Jan E, Bryan G, et al. Routine scale and polish for periodontal health in adults. *Cochrane Database Syst Rev* 2013(11):CD004625.
28. Lindsay P. *Care of the Adult with Intellectual Disability in Primary Care*. London, UK: Radcliffe Pub. 2011.
29. Di Benedetto A, Gigante I, Colucci S, et al. Periodontal disease: linking the primary inflammation to bone loss. *Clin Dev Immunol* 2013;2013(503754): 1-7.
30. Graves DT, Li J, Cochran DL. Inflammation and uncoupling as mechanisms of periodontal bone loss. *J Dent Res* 2011;90(2):143-53.
31. Poklepovic T, Worthington Helen V, Johnson Trevor M, et al. Interdental brushing for the prevention and control of periodontal diseases and dental caries in adults. *Cochrane Database Syst Rev* 2013(12):CD009857.
32. Watanabe K, Kijima S, Nonaka C, et al. Inhibitory effect for proliferation of oral bacteria in dogs by tooth brushing and application of toothpaste. *J Vet Med Sci* 2016;78(7):1205-8.
33. Marín M-J, Figuero E, González I. Comparison of the detection of periodontal pathogens in bacteraemia after tooth brushing by culture and molecular

1  
2  
3  
4 techniques. *Med Oral Patol Oral Cir Bucal* 2016;21(3):e276-84.  
5

6  
7 34. Kim MJ, Noh H, Oh HY. Efficiency of professional tooth brushing before  
8  
9 ultrasonic scaling. *Int J Dent Hyg* 2015;13(2):125-31.  
10

11 35. Elliott I, Nunn J, Sadlier D. *Oral health & disability: the way forward Ireland:*  
12  
13 National Disability Authority; 2005  
14  
15 <http://nda.ie/Image-Library/PDF-Downloads/PDF-Version-Oral-Health-The-Wa>  
16  
17 [y-Forward-939-KB-.pdf](http://nda.ie/Image-Library/PDF-Downloads/PDF-Version-Oral-Health-The-Wa). (accessed 10, August 2016)  
18  
19  
20  
21  
22  
23  
24  
25  
26  
27  
28  
29  
30  
31  
32  
33  
34  
35  
36  
37  
38  
39  
40  
41  
42  
43  
44  
45  
46  
47  
48  
49  
50  
51  
52  
53  
54  
55  
56  
57  
58  
59  
60

## STROBE Statement—checklist of items that should be included in reports of observational studies

|                              | Item No | Recommendation                                                                                                                                                                                                                                                                                                                                                                                                                                                                                                                                                                                                                                                                                   |
|------------------------------|---------|--------------------------------------------------------------------------------------------------------------------------------------------------------------------------------------------------------------------------------------------------------------------------------------------------------------------------------------------------------------------------------------------------------------------------------------------------------------------------------------------------------------------------------------------------------------------------------------------------------------------------------------------------------------------------------------------------|
| <b>Title and abstract</b>    | p1-3    | (a) Indicate the study's design with a commonly used term in the title or the abstract<br>(b) Provide in the abstract an informative and balanced summary of what was done and what was found                                                                                                                                                                                                                                                                                                                                                                                                                                                                                                    |
| <b>Introduction</b>          |         |                                                                                                                                                                                                                                                                                                                                                                                                                                                                                                                                                                                                                                                                                                  |
| Background/rationale         | P4      | Explain the scientific background and rationale for the investigation being reported                                                                                                                                                                                                                                                                                                                                                                                                                                                                                                                                                                                                             |
| Objectives                   | p5      | State specific objectives, including any prespecified hypotheses                                                                                                                                                                                                                                                                                                                                                                                                                                                                                                                                                                                                                                 |
| <b>Methods</b>               |         |                                                                                                                                                                                                                                                                                                                                                                                                                                                                                                                                                                                                                                                                                                  |
| Study design                 | P6      | Present key elements of study design early in the paper                                                                                                                                                                                                                                                                                                                                                                                                                                                                                                                                                                                                                                          |
| Setting                      | P6      | Describe the setting, locations, and relevant dates, including periods of recruitment, exposure, follow-up, and data collection                                                                                                                                                                                                                                                                                                                                                                                                                                                                                                                                                                  |
| Participants                 | P6      | (a) <i>Cohort study</i> —Give the eligibility criteria, and the sources and methods of selection of participants. Describe methods of follow-up<br><i>Case-control study</i> —Give the eligibility criteria, and the sources and methods of case ascertainment and control selection. Give the rationale for the choice of cases and controls<br><i>Cross-sectional study</i> —Give the eligibility criteria, and the sources and methods of selection of participants<br>(b) <i>Cohort study</i> —For matched studies, give matching criteria and number of exposed and unexposed<br><i>Case-control study</i> —For matched studies, give matching criteria and the number of controls per case |
| Variables                    | P6-8    | Clearly define all outcomes, exposures, predictors, potential confounders, and effect modifiers. Give diagnostic criteria, if applicable                                                                                                                                                                                                                                                                                                                                                                                                                                                                                                                                                         |
| Data sources/<br>measurement | P6-8    | For each variable of interest, give sources of data and details of methods of assessment (measurement). Describe comparability of assessment methods if there is more than one group                                                                                                                                                                                                                                                                                                                                                                                                                                                                                                             |
| Bias                         |         | Describe any efforts to address potential sources of bias                                                                                                                                                                                                                                                                                                                                                                                                                                                                                                                                                                                                                                        |
| Study size                   |         | Explain how the study size was arrived at                                                                                                                                                                                                                                                                                                                                                                                                                                                                                                                                                                                                                                                        |
| Quantitative variables       | P6-8    | Explain how quantitative variables were handled in the analyses. If applicable, describe which groupings were chosen and why                                                                                                                                                                                                                                                                                                                                                                                                                                                                                                                                                                     |
| Statistical methods          | P9-10   | (a) Describe all statistical methods, including those used to control for confounding<br>(b) Describe any methods used to examine subgroups and interactions<br>(c) Explain how missing data were addressed<br>(d) <i>Cohort study</i> —If applicable, explain how loss to follow-up was addressed<br><i>Case-control study</i> —If applicable, explain how matching of cases and controls was addressed<br><i>Cross-sectional study</i> —If applicable, describe analytical methods taking account of sampling strategy<br>(e) Describe any sensitivity analyses                                                                                                                                |

Continued on next page

**Results**

|                  |        |                                                                                                                                                                                                                                                                                                                                                                                                               |
|------------------|--------|---------------------------------------------------------------------------------------------------------------------------------------------------------------------------------------------------------------------------------------------------------------------------------------------------------------------------------------------------------------------------------------------------------------|
| Participants     | P10    | (a) Report numbers of individuals at each stage of study—eg numbers potentially eligible, examined for eligibility, confirmed eligible, included in the study, completing follow-up, and analysed<br>(b) Give reasons for non-participation at each stage<br>(c) Consider use of a flow diagram                                                                                                               |
| Descriptive data | P10–11 | (a) Give characteristics of study participants (eg demographic, clinical, social) and information on exposures and potential confounders<br>(b) Indicate number of participants with missing data for each variable of interest<br>(c) <i>Cohort study</i> —Summarise follow-up time (eg, average and total amount)                                                                                           |
| Outcome data     | P12–13 | <i>Cohort study</i> —Report numbers of outcome events or summary measures over time<br><i>Case-control study</i> —Report numbers in each exposure category, or summary measures of exposure<br><i>Cross-sectional study</i> —Report numbers of outcome events or summary measures                                                                                                                             |
| Main results     | p13–15 | (a) Give unadjusted estimates and, if applicable, confounder-adjusted estimates and their precision (eg, 95% confidence interval). Make clear which confounders were adjusted for and why they were included<br>(b) Report category boundaries when continuous variables were categorized<br>(c) If relevant, consider translating estimates of relative risk into absolute risk for a meaningful time period |
| Other analyses   |        | Report other analyses done—eg analyses of subgroups and interactions, and sensitivity analyses                                                                                                                                                                                                                                                                                                                |

**Discussion**

|                  |        |                                                                                                                                                                            |
|------------------|--------|----------------------------------------------------------------------------------------------------------------------------------------------------------------------------|
| Key results      | p15    | Summarise key results with reference to study objectives                                                                                                                   |
| Limitations      | p19    | Discuss limitations of the study, taking into account sources of potential bias or imprecision. Discuss both direction and magnitude of any potential bias                 |
| Interpretation   | p16–19 | Give a cautious overall interpretation of results considering objectives, limitations, multiplicity of analyses, results from similar studies, and other relevant evidence |
| Generalisability | p19–20 | Discuss the generalisability (external validity) of the study results                                                                                                      |

**Other information**

|         |     |                                                                                                                                                               |
|---------|-----|---------------------------------------------------------------------------------------------------------------------------------------------------------------|
| Funding | P21 | Give the source of funding and the role of the funders for the present study and, if applicable, for the original study on which the present article is based |
|---------|-----|---------------------------------------------------------------------------------------------------------------------------------------------------------------|

\*Give information separately for cases and controls in case-control studies and, if applicable, for exposed and unexposed groups in cohort and cross-sectional studies.

**Note:** An Explanation and Elaboration article discusses each checklist item and gives methodological background and published examples of transparent reporting. The STROBE checklist is best used in conjunction with this article (freely available on the Web sites of PLoS Medicine at <http://www.plosmedicine.org/>, Annals of Internal Medicine at <http://www.annals.org/>, and Epidemiology at <http://www.epidem.com/>). Information on the STROBE Initiative is available at [www.strobe-statement.org](http://www.strobe-statement.org).

# BMJ Open

## Prevalence of and factors associated with fewer than 20 remaining teeth in Taiwanese adults with disabilities: A community-based cross-sectional study

|                                 |                                                                                                                                                                                                                              |
|---------------------------------|------------------------------------------------------------------------------------------------------------------------------------------------------------------------------------------------------------------------------|
| Journal:                        | <i>BMJ Open</i>                                                                                                                                                                                                              |
| Manuscript ID                   | bmjopen-2017-016270.R1                                                                                                                                                                                                       |
| Article Type:                   | Research                                                                                                                                                                                                                     |
| Date Submitted by the Author:   | 09-May-2017                                                                                                                                                                                                                  |
| Complete List of Authors:       | Pan, Mei-Yu ; Chang Gung University of Science and Technology - Chiayi Campus<br>Hsieh, Tsung-Cheng<br>Tai, Hung-Cheng<br>Lin, Yu-Chen<br>Chen, Mei-Yen; Chang Gung University of Science and Technology, Nursing Department |
| <b>Primary Subject Heading</b>: | Dentistry and oral medicine                                                                                                                                                                                                  |
| Secondary Subject Heading:      | Nursing, Public health, Health services research                                                                                                                                                                             |
| Keywords:                       | Disabilities, number of remaining teeth, health promotion, oral hygiene                                                                                                                                                      |
|                                 |                                                                                                                                                                                                                              |

SCHOLARONE™  
Manuscripts

1  
2  
3  
4 **Prevalence of and factors associated with fewer than 20 remaining teeth in**  
5  
6 **Taiwanese adults with disabilities: A community-based cross-sectional study**  
7

8 †Mei-Yu Pan, RN, MSN, Department of Nursing, Chang Gung University of Science  
9 and Technology, Chiayi, Taiwan.

10  
11 PhD, candidate, Institute of Medical Sciences, Tzu Chi University, Hualien,  
12  
13 Taiwan.  
14

15  
16  
17 †Tsung-Cheng Hsieh, PhD, Institute of Medical Sciences, Tzu Chi University, Hualien,  
18  
19 Taiwan.  
20

21  
22 Hung-Cheng Tai, Department of General Education, Chang Gung University of  
23  
24 Science and Technology, Chiayi, Taiwan.  
25

26  
27 Yu-Chen Lin, MS, RN, Director, Department of Health Promotion, Chiayi Bureau of  
28  
29 Health, Taiwan.  
30

31  
32 Mei-Yen Chen, RN, PhD, Professor, College of Nursing, Chang Gung University of  
33  
34 Science and Technology, Chiayi, Taiwan.

35  
36 Research Fellow in Chang Gung Memorial Hospital, Chiayi, Taiwan.

37  
38 Department of Nursing, Chang Gung University, Taoyuan, Taiwan.  
39

40 † **Equal contribution**

41  
42 **Corresponding author:**

43  
44 Address Correspondence to: Mei-Yen Chen, No. 2, Chiapu Rd. West Sec., Putz City,  
45  
46 Chiayi County 61363, Taiwan. Tel: +886 (5) 3628800 ext. 2201; Fax: +886 (5)  
47  
48 3628866. E-mail: [meiyen@mail.cgust.edu.tw](mailto:meiyen@mail.cgust.edu.tw)  
49

50  
51 **Keywords**

52  
53 Disabilities; number of remaining teeth; health promotion; oral hygiene

54  
55 Word count: 4202  
56  
57  
58  
59  
60

## ABSTRACT

**Objectives:** To examine the prevalence of and the factors associated with a number of remaining teeth (NRT) < 20 among adults with disabilities.

**Design:** A community-based, cross-sectional descriptive study.

**Setting:** This study was part of a health-promotion program designed for community-dwelling adults with disabilities.

**Participants:** A total of 549 adults with disabilities, aged 20–80 years, living in the community in Chiayi County in Taiwan.

**Outcome measures:** Various parameters, including NRT, oral health behaviors (i.e., oral hygiene, dietary habits, and substance use), comorbidities, disability classification, and capability for performing activities of daily living, were measured. Data were statistically analyzed using descriptive statistics and multivariate logistic regression analysis.

**Results:** The mean NRT was 18.1 (standard deviation = 10.9); 44.9% of participants had NRT < 20. Most participants had poor oral hygiene: 83% reported seldom using dental floss, 78% did not undergo regular 6-monthly dental check-ups, and 77.4% seldom brushed their teeth after meal. After adjusting for potentially confounding variables, the intellectual disability group had a significantly higher risk of an NRT < 20 than the physical disability group (odds ratio: 2.30,  $p = 0.004$ ). Additionally, the rare use of dental floss and hypertension significantly increased the possibility of an NRT < 20 (odds ratio: 1.73–2.12,  $p = 0.008$ – $0.009$ ).

**Conclusions:** An NRT < 20 was highly prevalent among adults with disabilities, who displayed poor oral hygiene behaviors. Adults with intellectual disabilities had a greater likelihood of having an NRT < 20 than did those with physical disabilities. In



1  
2  
3  
4 addition to unmodifiable factors, the poor use of dental floss was significantly  
5  
6 associated with an NRT < 20.  
7  
8  
9

### 10 11 **Strengths and limitations of this study**

- 12  
13 ● Few studies have reported the prevalence of and factors associated with few  
14 remaining teeth among adults with disabilities, particularly in those residing in  
15 communities.  
16  
17
- 18  
19 ● These results highlight the value of nurse-led health promotion programs and  
20 implementation of a multidisciplinary approach for the early detection of a low  
21 number of remaining teeth in community-dwelling adults with disabilities.  
22  
23
- 24  
25 ● The limitations of the study, including the non-randomized sampling strategy  
26 and recruitment of individuals with disabilities that did not preclude mobility in  
27 coming to the examination center, may hinder generalization of our findings.  
28  
29  
30  
31  
32

33  
34  
35  
36  
37  
38  
39  
40  
41  
42  
43  
44  
45  
46  
47  
48  
49  
50  
51  
52  
53  
54  
55  
56  
57  
58  
59  
60

1

## 1 INTRODUCTION

2 Having 20 teeth or more helps adults maintain good oral function and overall  
3 health. Teeth are recognized as calcified structures in the mouth, with the primary  
4 purpose of mastication, but act as part of the broader digestive system to help the  
5 body obtain nutrition.<sup>1-3</sup> Other key functional aspects of teeth include speaking and  
6 communication, facial appearance, facilitating interpersonal relationships, enhancing  
7 quality of life, systemic health, and cognitive function; teeth are also associated with  
8 disability status, and even with mortality.<sup>3-6</sup> Unfortunately, 3.9 billion individuals  
9 worldwide experience oral disorders, including untreated caries, severe periodontal  
10 disease, and severe tooth loss, thereby prolonging the years lived with disability.<sup>4</sup> In  
11 fact, as early as 1991, Japan conducted a series of oral campaigns called the “8020” to  
12 encourage citizens to maintain at least 20 remaining teeth through the age of 80.<sup>3</sup>  
13 Previous studies on elderly people also proved that the lower the number of remaining  
14 teeth (NRT), the greater the impact on individuals’ health. These impacts include a  
15 higher risk of cognitive impairments, decreased self-care capabilities, heart rate  
16 acceleration, influences on the quality of life, and decreased cumulative survival  
17 rate.<sup>1,3</sup> The issue of the NRT has become an important indicator of oral and overall  
18 health in adults.

19 Awareness of the factors associated with an NRT < 20 forms the basis for good  
20 oral care. Of all the risk factors for an NRT < 20, age is probably the primary  
21 factor,<sup>7-10</sup> but it is not a controllable or reversible factor; neither are sex and  
22 education.<sup>10-12</sup> Therefore, public health professionals concentrate on those risk factors  
23 that can be modified. Other factors associated with tooth loss include hypertension,  
24 diabetes mellitus, hyperlipidemia, poor oral hygiene, unhealthy diet, smoking, and  
25 harmful alcohol consumption,<sup>10-11, 13-15</sup> but those that are specific for individuals with

1 disabilities remain unclear.

2       The oral health condition of disabled individuals is often worse than that of  
3 non-disabled adults.<sup>2, 16-23</sup> Utilization of oral health services is also far lower than the  
4 average for this group.<sup>16-17, 24</sup> The World Health Organization has warned that, as the  
5 population ages and chronic diseases increase, there will be an increase in the rate of  
6 disability. Currently, more than a billion people worldwide (15%) live with some form  
7 of disability, with 2–4% of those over the age of 15 years having significant  
8 difficulties in functioning. In addition, owing to poverty and difficulties with mobility,  
9 the disabled are particularly vulnerable in terms of accessing satisfactory health care  
10 services. They are also more likely to engage in risky health behaviors and to be  
11 affected by more complications, more comorbidities, faster degeneration, and earlier  
12 mortality.<sup>25</sup> In Taiwan, there are more than 1.1 million people with disabilities (4.8%  
13 of the population).<sup>26</sup> Research has shown that disabled adults rarely use oral health  
14 services,<sup>27</sup> even though the government has already increased their oral care services.  
15 These premium subsidies funded by the NHI (National Health Insurance) system  
16 contain, for instance, use of fluoride gel/varnishes, more frequent dental scaling,  
17 bonuses for the dentists treating patients with specific disabilities, etc.<sup>28</sup> In terms of  
18 human rights, preventing the increase in levels of disability, as well as reducing the  
19 caregivers' burdens, which are issues relating to oral health care for vulnerable groups,  
20 deserve much attention.

21       However, although some previous studies have focused on  
22 institution-accommodated adults with disabilities,<sup>2,18</sup> fewer reports have discussed  
23 disabled individuals living in communities. The prevalence of NRT < 20 and factors  
24 potentially relevant to oral health among non-institutional disabilities were also  
25 seldom discussed. Therefore, the aims of this study were to explore the prevalence of

1 and factors associated with an NRT < 20 among community-dwelling adults with  
2 disabilities in Taiwan, and explore the oral health behaviors among these participants.

### 3 **METHODS**

#### 4 **Design, sample, and setting**

5 This study, which was part of a second-year health-promotion program designed  
6 for community-dwelling adults with disabilities, was led by a nursing team in  
7 collaboration with a district hospital and the Bureau of Health Promotion of Chiayi  
8 County in Taiwan.<sup>25</sup> In Chiayi County, visual impairment, hearing impairment,  
9 intellectually disability, and physical disability affect more than 38,800 individuals,  
10 accounting for 64% of the local disabled population. This paper is part of a series of  
11 reports regarding health issues of community-based people with disabilities. A  
12 community-based health screening survey was conducted between July and December  
13 in 2014 using a cross-sectional descriptive design.

14 Participants were selected through convenience sampling from the registry of the  
15 government's social welfare center.<sup>21</sup> The inclusion criteria were: (1) adults certified  
16 with either visual impairment, hearing impairment, intellectual disability, or physical  
17 disability; (2) age  $\geq$  20 years; (3) ability to complete the written questionnaire in  
18 either Mandarin or Taiwanese, with assistance from the interviewers; (4) ability to  
19 walk to the examination center with/without help; and (5) ability to sign the consent  
20 forms prior to recruitment. Exclusion criteria were: (1) living in institutions; (2)  
21 having more than one category of disability; (3) inability to answer questions; or (4)  
22 having a serious disease, such as kidney disease requiring dialysis or cancer.

#### 23 **Measurements**

24 1. *Number of remaining teeth (NRT)*: The NRT was obtained by research assistants  
25 by asking the participants to open his/her mouths and then counting the total

1  
2  
3  
4 1 number of natural teeth and fixed dentures, after discharging the removable  
5  
6 2 dentures in the oral cavities. Root fragments without a crown were excluded.

7  
8  
9 3 2. *Oral health behaviors:* Oral health behaviors were measured in terms of seven  
10  
11 4 habits, i.e., brushing teeth, using dental floss, visiting dentists or undergoing dental  
12  
13 5 scaling, drinking alcohol, smoking, five groups of nutrition, and water intake. This  
14  
15 6 information was collected through standardized personal interviews using a  
16  
17 7 structured questionnaire that was based on the published literature.<sup>7, 10</sup> The  
18  
19 8 participants were asked to recall their oral health behaviors up to a year previously  
20  
21 9 and/or when they were dentate.

22  
23  
24 10 In this study, answers regarding the brushing of teeth were categorized as frequent  
25  
26 11 ( $\geq$  twice a day) vs. infrequent ( $<$  twice a day). As for immediate brushing teeth  
27  
28 12 after a meal, participants were classified as “often” if they responded with  
29  
30 13 “usually” or “frequently”, or “seldom” if they responded with “never” or  
31  
32 14 “sometimes”. For using dental floss, responses were classified as “often” if dental  
33  
34 15 floss was used to clean interdental spaces  $\geq$  once a day, or “seldom” if the  
35  
36 16 respondents’ answer was “never” or “sometimes.” Regarding visits to dentists,  
37  
38 17 participants were classified as “regular” if they visited dentists and underwent  
39  
40 18 scaling every 6 months, or “irregular” if they responded “never” or “sometimes.”  
41  
42 19 For questions “Do you smoke cigarettes or drink alcohol?”, participants were  
43  
44 20 classified as “none or formerly” if they had never engaged in these behaviors or  
45  
46 21 had stopped doing so for the past year, or as “current users.” Regarding five groups  
47  
48 22 of nutrition intake, the response was considered “balanced” if the respondents  
49  
50 23 usually or always had five groups of nutrition (i.e., meat, milk, grains, vegetables,  
51  
52 24 and fruit) each day, or “unbalanced” if they never or sometimes had these foods. In  
53  
54 25 terms of water intake, answers were categorized as sufficient ( $\geq$  1500 mL per day)

1 vs. insufficient (< 1500 mL per day). Participants, especially those with intellectual  
2 and hearing disabilities, were guided to reply their habits through visual aids,  
3 samples, progressive interactions, and caregivers' confirmations when necessary.

4 3. *Background information:* Background information comprised three sections. First,  
5 demographic variables obtained from the questionnaires, including age, gender,  
6 and educational attainment (years of education received, or level of school  
7 completed). Second, prevalence of the three common chronic diseases (i.e.,  
8 hypertension, diabetes mellitus, and hyperlipidemia). These three diseases were  
9 assessed using medical history (diagnosed by a physician) and/or physiological  
10 biomarkers, including blood pressure (BP), fasting blood glucose (FBG),  
11 triglyceride (TG), total cholesterol (TC), low-density lipoprotein (LDL)  
12 cholesterol, and high-density lipoprotein (HDL) cholesterol levels. Following the  
13 national standard of the Ministry of Health and Welfare,<sup>29</sup> blood samples were  
14 evaluated and BP was measured at the time of the study, applying standard  
15 procedures. The three common chronic diseases were defined as (1) diabetes  
16 mellitus (FBG  $\geq$ 126 mg/dL, or if ever diagnosed by a doctor); (2) hypertension  
17 (systolic/diastolic BP  $\geq$ 140/90 mmHg, or if ever diagnosed by a doctor); and (3)  
18 hyperlipidemia (LDL  $\geq$ 160 mg/dL, TC  $\geq$ 240 mg/dL, TG  $\geq$ 200 mg/dL, or if ever  
19 diagnosed by a doctor). Third, disability classification and capability of activity of  
20 daily living (ADL). Specific disabilities, such as physical, hearing, vision, or  
21 intellectual disabilities, were identified and confirmed by the certificates issued by  
22 the Taiwanese government<sup>26</sup> prior to the interviews. ADL capability, judged using  
23 the Barthel ADL Index of feeding, grooming, bathing, mobility, toilet use, transfer,  
24 etc., reflected the dependence level of participants who required external assistance  
25 to complete these activities. "Independent" was coded if external assistance was

1 unnecessary, or “dependent” if it was needed.

## 2 **Procedures and ethical considerations**

3 This study was approved by the relevant institutional review board of Chang  
4 Gung Memorial Hospital (IRB 102-3331B), and all procedures complied with the  
5 ethical guidelines. Participants were invited to participate in the study via letters sent  
6 by the public health nurses, and were fully informed about the purposes of the study.  
7 The letter emphasized the confidentiality of all collected data. Written consent forms  
8 were appropriately explained to and signed by participants and/or their guardians  
9 before arranging free medical evaluations. These evaluations, including blood  
10 sampling and physical check-ups, were conducted by the local hospital staff on a  
11 weekend, in a school auditorium, followed by individual interviews. To create a  
12 caring and friendly environment, each participant was accompanied by a community  
13 volunteer during the health screenings. If a participant was not an effective responder,  
14 a familiar caregiver, who was normally a family member(s) with whom they were  
15 living, was allowed to represent the participant in answering the questions.

16 The NRT was calculated carefully by research assistants who were trained by a  
17 research team that included the investigators and a dentist. Details of the interviews  
18 and measurement procedures have been reported in our previous study.<sup>10</sup> Face and  
19 content validity of the instrument were judged to be good (0.88–0.91) by a panel of  
20 five experts: a faculty member in public health and health education, a dentist, a social  
21 worker in a disabled institution, and two nursing faculty members who specialize in  
22 the field of long-term care.

## 23 **Statistical analyses**

24 Quantitative data were analyzed using SPSS v. 22.0 software. Descriptive  
25 statistical data are presented as numbers and percentages for categorical variables, and

1 as means  $\pm$  standard deviations for continuous variables. To identify the modifiable  
2 factors, factors associated with fewer teeth (NRT < 20) were identified using stepwise  
3 logistic regression analysis, in three models. The first model involved univariate  
4 analysis, and was unadjusted, to examine the associations between exposures and  
5 NRT < 20. The second model, model 1, was partially adjusted, for three irreversible  
6 confounding factors, including age, gender, and education. The third, model 2, was  
7 fully adjusted for all exposures in the current study. For models 1 and 2, multivariable  
8 logistic regression analysis with a forward variable entry method (entry criteria:  
9 p-value < 0.05 in univariate analysis) was implemented. The odds ratio (OR) with  
10 95% confidence interval (CI) and corresponding p-value were obtained by the logistic  
11 regression model. All statistical assessments adopted two-tailed tests, and the p-value  
12 cut-off point for statistical significance was set as 0.05.

## 14 RESULTS

15 Of the 603 individuals invited to participate in the study, 549 participants enrolled  
16 in the analysis, but 18 failed to complete the NRT measurement. The response rate  
17 was 91%. The majority of the participants were male (54.3%), aged 20–80 years  
18 (mean age  $58.8 \pm 13.9$ ), and were not well-educated (educational attainment  $\leq 9$  years:  
19 67.4%). The distribution of disabilities by type was as follows: physical (55.9%),  
20 intellectual (19.7%), hearing (15.7%), and vision (8.7%). Most participants (88.7%)  
21 did not require assistance in the activities of daily living (ADL), as they only had a  
22 mild degree of disability. In addition, the prevalence rates of hypertension,  
23 hyperlipidemia, and diabetes mellitus were 56.5%, 49.9%, and 23.9%, respectively  
24 (Table 1).

25 As shown in Table 2, the participants had less teeth (mean NRT  $18.1 \pm 10.9$ ;



1 median 21.0; NRT < 20: 44.8%; NRT = 0: 13.7%), and had poor oral hygiene (seldom  
 2 dental floss: 83.4%; irregular dental visit: 78.0%; seldom brushed teeth after meal:  
 3 77.4%; daily teeth brushing:  $1.8 \pm 0.9$  times). They also had other unfavorable  
 4 behaviors (insufficient water intake/unbalanced nutrition: 40.3%; smoking: 25.3%;  
 5 drinking alcohol: 16.2%).  
 6

Table 1. Background information of the subjects (n = 549)

| Variables                    | n (%)      | Mean $\pm$ SD   |
|------------------------------|------------|-----------------|
| Gender                       |            |                 |
| Female                       | 251 (45.7) |                 |
| Male                         | 298 (54.3) |                 |
| Age (years)                  |            |                 |
| < 65                         | 331 (60.3) | 58.8 $\pm$ 13.9 |
| $\geq$ 65                    | 218 (39.7) |                 |
| Educational attainment       |            |                 |
| > 9 years                    | 179 (32.6) |                 |
| $\leq$ 9 years               | 370 (67.4) |                 |
| Hypertension                 |            |                 |
| No                           | 239 (43.5) |                 |
| Yes                          | 310 (56.5) |                 |
| Diabetes mellitus            |            |                 |
| No                           | 418 (76.1) |                 |
| Yes                          | 131 (23.9) |                 |
| Hyperlipidemia               |            |                 |
| No                           | 275 (50.1) |                 |
| Yes                          | 274 (49.9) |                 |
| Disability classification    |            |                 |
| Physical disability          | 307 (55.9) |                 |
| Intellectual disability      | 108 (19.7) |                 |
| Hearing impairment           | 86 (15.7)  |                 |
| Vision impairment            | 48 ( 8.7)  |                 |
| Capability of ADL (n = 548)* |            |                 |
| Independent                  | 486 (88.7) |                 |
| Dependent                    | 62 (11.3)  |                 |

1 ADL, activities of daily living; \*1 missing data

2

3  
4  
5  
6  
7 Table 2. Number of remaining teeth and oral health behaviors (n = 549)

| Variables                     | n (%)      | Mean ± SD                |
|-------------------------------|------------|--------------------------|
| Group of NRT (n=531)*         |            | 18.1 ± 10.9 <sup>†</sup> |
| 0                             | 73 (13.7)  |                          |
| 1-19                          | 165 (31.1) |                          |
| 20-29                         | 215 (40.5) |                          |
| ≥30                           | 78 (14.7)  |                          |
| Oral hygiene                  |            |                          |
| Times of daily brushing teeth |            | 1.8 ± 0.9                |
| Frequent (≥ 2 times/day)      | 372 (67.8) |                          |
| Infrequent (< 2 times/day)    | 177 (32.2) |                          |
| Brushing teeth after meal     |            |                          |
| Often                         | 124 (22.6) |                          |
| Seldom                        | 425 (77.4) |                          |
| Using dental floss            |            |                          |
| Often (≥ once a day)          | 91 (16.6)  |                          |
| Seldom (< once a day)         | 458 (83.4) |                          |
| Visiting dentist per 6 months |            |                          |
| Regular                       | 121 (22.0) |                          |
| Irregular                     | 428 (78.0) |                          |
| Water intake                  |            |                          |
| Sufficient (≥ 1500 ml/day)    | 328 (59.7) |                          |
| Insufficient (< 1500 ml/day)  | 221 (40.3) |                          |
| Five nutrition groups per day |            |                          |
| Balanced                      | 328 (59.7) |                          |
| Unbalanced                    | 221 (40.3) |                          |
| Smoking habit                 |            |                          |
| Never or formerly             | 410 (74.7) |                          |
| Current users                 | 139 (25.3) |                          |
| Alcohol habit                 |            |                          |
| Never or formerly             | 460 (83.8) |                          |
| Current users                 | 89 (16.2)  |                          |

8  
9  
10  
11  
12  
13  
14  
15  
16  
17  
18  
19  
20  
21  
22  
23  
24  
25  
26  
27  
28  
29  
30  
31  
32  
33  
34  
35  
36  
37  
38  
39  
40  
41  
42  
43  
44  
45  
46  
47  
48  
49  
50  
51  
52  
53  
54  
55  
56  
57  
58  
59  
60

3 NRT, number of remaining teeth; \*18 missing data; <sup>†</sup> median of NRT = 21.0.

1 Table 3. Prevalence of NRT &lt; 20, univariate analyses and multivariate logistic regression of the factors associated with NRT &lt; 20 (n = 531)

| Variables/ Values             | Prevalence of        | Univariate analyses |         | Model 1          |         | Model 2          |         |
|-------------------------------|----------------------|---------------------|---------|------------------|---------|------------------|---------|
|                               | NRT < 20<br>n/N' (%) | OR (95% CI)         | p Value | OR (95% CI)      | p Value | OR (95% CI)      | p Value |
| <b>Gender</b>                 |                      |                     |         |                  |         |                  |         |
| Female                        | 121/244 (49.6)       |                     |         |                  |         |                  |         |
| Male                          | 117/287 (40.8)       |                     |         |                  |         |                  |         |
| <b>Age (years)</b>            |                      |                     |         |                  |         |                  |         |
| < 65                          | 94/322 (29.2)        |                     |         |                  |         |                  |         |
| ≥ 65                          | 144/209 (68.9)       |                     |         |                  |         |                  |         |
| <b>Educational attainment</b> |                      |                     |         |                  |         |                  |         |
| > 9 years                     | 43/175 (24.6)        |                     |         |                  |         |                  |         |
| ≥ 9 years                     | 195/356 (54.8)       |                     |         |                  |         |                  |         |
| <b>Hypertension</b>           |                      |                     |         |                  |         |                  |         |
| No*                           | 77/231 (33.3)        | -                   |         | -                |         | -                |         |
| Yes                           | 161/300 (53.7)       | 2.32 (1.62-3.31)    | <0.001  | 1.61 (1.09-2.39) | 0.018   | 1.73 (1.15-2.60) | 0.008   |
| <b>Diabetes mellitus</b>      |                      |                     |         |                  |         |                  |         |
| No*                           | 168/403 (41.7)       | -                   |         | -                |         | -                |         |
| Yes                           | 70/128 (54.7)        | 1.69 (1.13-2.52)    | 0.010   | NE               |         | NE               |         |
| <b>Hyperlipidemia</b>         |                      |                     |         |                  |         |                  |         |
| No*                           | 125/263 (47.5)       | -                   |         | -                |         | -                |         |
| Yes                           | 113/268 (42.2)       | 0.81 (0.57-1.13)    | 0.214   | NE               |         | NE               |         |

## Disability classification

|                         |                |                  |       |                  |       |                  |       |
|-------------------------|----------------|------------------|-------|------------------|-------|------------------|-------|
| Physical disability *   | 131/297 (44.1) | -                | -     | -                | -     | -                | -     |
| Intellectual disability | 40/104 (38.5)  | 0.79 (0.50-1.25) | 0.317 | 2.20 (1.26-3.84) | 0.006 | 2.30 (1.30-4.08) | 0.004 |
| Hearing impairment      | 39/83 (47.0)   | 1.12 (0.69-1.83) | 0.641 | 0.76 (0.44-1.32) | 0.322 | 0.75 (0.43-1.32) | 0.316 |
| Vision impairment       | 28/47 (59.6)   | 1.87 (0.99-3.49) | 0.051 | 1.54 (0.75-3.13) | 0.237 | 1.48 (0.72-3.04) | 0.290 |

## Capability of ADL

|              |                |                  |       |    |   |    |   |
|--------------|----------------|------------------|-------|----|---|----|---|
| Independent* | 210/473 (44.4) | -                | -     | -  | - | -  | - |
| Dependent    | 28/58 (48.3)   | 1.17 (0.68-2.02) | 0.575 | NE | - | NE | - |

## Oral health behaviors

## Daily brushing teeth

|            |                |                  |       |    |   |    |   |
|------------|----------------|------------------|-------|----|---|----|---|
| Frequent*  | 160/364 (44.0) | -                | -     | -  | - | -  | - |
| Infrequent | 78/167 (46.7)  | 1.12 (0.77-1.61) | 0.554 | NE | - | NE | - |

## Using dental floss

|        |                |                  |        |                  |       |                  |       |
|--------|----------------|------------------|--------|------------------|-------|------------------|-------|
| Often* | 24/91 (26.4)   | -                | -      | -                | -     | -                | -     |
| Seldom | 214/440 (48.6) | 2.64 (1.60-4.37) | <0.001 | 2.22 (1.28-3.83) | 0.004 | 2.12 (1.21-3.71) | 0.009 |

## Visiting dentist

|           |                |                  |       |    |   |    |   |
|-----------|----------------|------------------|-------|----|---|----|---|
| Regular*  | 45/118 (38.1)  | -                | -     | -  | - | -  | - |
| Irregular | 193/413 (46.7) | 1.42 (0.94-2.16) | 0.099 | NE | - | NE | - |

## Water intake

|              |                |                  |       |    |   |    |   |
|--------------|----------------|------------------|-------|----|---|----|---|
| Sufficient*  | 105/212 (49.5) | -                | -     | -  | - | -  | - |
| Insufficient | 133/319 (41.7) | 1.37 (0.97-1.95) | 0.076 | NE | - | NE | - |

## Five nutrition groups per day

|           |                |   |   |   |   |   |   |
|-----------|----------------|---|---|---|---|---|---|
| Balanced* | 131/322 (40.7) | - | - | - | - | - | - |
|-----------|----------------|---|---|---|---|---|---|

1  
2  
3  
4  
5  
6  
7  
8  
9  
10  
11  
12  
13  
14  
15  
16  
17  
18  
19  
20  
21  
22  
23  
24  
25  
26  
27  
28  
29  
30  
31  
32  
33  
34  
35  
36  
37  
38  
39  
40  
41  
42  
43  
44  
45  
46  
47  
48  
49

|                    |                |                  |       |                 |       |    |
|--------------------|----------------|------------------|-------|-----------------|-------|----|
| Unbalanced         | 107/209 (51.2) | 1.53 (1.08-2.17) | 0.018 | 1.58(1.07-2.34) | 0.022 | NE |
| Smoking habit      |                |                  |       |                 |       |    |
| Never or formerly* | 179/397 (45.1) | -                |       | -               |       | -  |
| Current users      | 59/134 (44.0)  | 0.96 (0.65-1.42) | 0.831 | NE              |       | NE |
| Alcohol habit      |                |                  |       |                 |       |    |
| Never or formerly* | 202/447 (45.2) | -                |       | -               |       |    |
| Current users      | 36/84 (42.9)   | 0.91 (0.57-1.46) | 0.693 | NE              |       | NE |

---

1 NRT, number of remaining teeth; ADL, activities of daily living; OR, odds ratio; CI, confidence interval.  
2 N = 531 for 18 missing NRT data. N': total number of each category. NE: variables were not selected into the model by the forward variable  
3 entry method. Model 1: adjusted for age, gender, and education; model 2: model 1 + all variables in Table 3. \* Reference group.

1           Regarding Table 3, after adjusting for all exposures (in model 2), the intellectual  
2           disability group had a significantly higher likelihood of having an NRT < 20 than the  
3           physical disability group (OR: 2.20, 95% CI: 1.26–3.84, p = 0.006), while the risk of  
4           an NRT < 20 in the other two subgroups were not increased. From the results of the  
5           three models, i.e., univariate analysis, model 1, and model 2, the demographic  
6           variables seemed to confound an NRT < 20 associated with disability classifications.  
7           The other factors associated with an NRT < 20 were seldom use of dental floss (OR:  
8           2.12–2.64) and a history of hypertension (OR: 1.61–2.32).

## 9           **DISCUSSION**

10           This study featured a nurse-led health program aimed at promoting the oral  
11           health of disabled individuals. Four key findings emerged: first, fewer teeth were  
12           counted and there was a higher prevalence of an NRT < 20 in the present study  
13           population than in those reported in the existing literature. According to previous  
14           research, the average NRT for non-disabled people is approximately 25,<sup>10</sup> and only  
15           16% of these individuals have an NRT < 20.<sup>2, 10</sup> However, in this study, the average  
16           NRT in disabled individuals was 18.1, and 44.8% had an NRT < 20, which indicated  
17           a significantly worse oral health condition. Even when ruling out the edentulous  
18           individuals, the average NRT was 20.9, and prevalence of NRT < 20 was 36.0%  
19           among the dentate subgroup. This slight change in the statistic from 18.1 to 20.9, and  
20           from 44.8% to 36.0%, does not indicate a change in the trend. The literature supports  
21           the view that adults with disabilities commonly exhibit poor oral hygiene and have  
22           fewer NRT than non-disabled people, owing to their limited capabilities, in terms of  
23           cognitive comprehension, body coordination, or muscle power.<sup>11, 19</sup> In fact, the  
24           prevalence of an NRT < 20 in this study was not only higher than the figures  
25           previously reported for non-disabled people, but was also higher than that reported in

1 a Belgian study of people with disabilities (33%).<sup>2</sup> Moreover, the edentulous rate of  
2 13.7% found in this study was also higher than the edentulous rate of 8.9% reported  
3 by a study conducted in the USA.<sup>16</sup>

4 Second, most disabled participants reported having inadequate oral hygiene  
5 behaviors in general. These behaviors, including seldom using dental floss, irregular  
6 dental visits and scaling, and rarely brushing teeth after meals, were factors associated  
7 with tooth loss in previous reports,<sup>1, 7-8</sup> and may also affect other systemic diseases.<sup>5</sup>  
8 The prevalence of these behaviors in this study was 83.4%, 78.0%, and 77.4%,  
9 respectively, which was much higher than in the non-disabled population (about  
10 28–70%);<sup>7, 10, 15-17</sup> and were also greater than those in disabled individuals in other  
11 countries (29–51%).<sup>16,24</sup> Although irregular dental visits were not a significant factor  
12 for an NRT < 20 in the current study, most previous studies indicated the importance  
13 of regular dental care.<sup>1-2, 30-31</sup> To encourage regular dental care, the Taiwanese  
14 government has provided incentives under the NHI system, by requiring only  
15 payment of a registration and copayment fee, for use of oral health services by the  
16 disabled.<sup>28</sup> However, individuals with disabilities typically do not visit dentists until  
17 their dental problems become too serious to be treated, and tooth extraction is often  
18 unavoidable. The issue of regular dental visits to help maintain a greater number of  
19 teeth in the disabled should be explored in future.

20 Third, adults with intellectual disability have an increased possibility of having an  
21 NRT < 20. In comparison with physical disability, the subgroup of individuals with  
22 intellectual disabilities was at higher risk of having fewer teeth, which is consistent  
23 with the findings of previous studies.<sup>2,9,18,22</sup> Lindsay<sup>32</sup> attributes this phenomenon to  
24 their preferences for eating desserts, sweets, and drinking soft drinks; similarly, their  
25 reduced capacity for self-control owing to their cognitive impairments could also

1 modulate this effect. These individuals often are not fully capable of independent  
2 self-care, and their caregivers may find it difficult to perform oral hygiene activities  
3 for them over the long run. In addition, adults with developmental disabilities often  
4 appear to have disorders, such as gastro-esophageal reflux disease, excessive  
5 salivation, and induced xerostomia triggered by antiepileptic medications, which  
6 could increase the possibility of their poor oral health.

7 Fourth, the use of dental floss is a modifiable factor associated with the NRT.  
8 Except for intellectual disabilities, other associated factors, such as the rare use of  
9 dental floss' and hypertension,<sup>1, 10, 13</sup> are similar to the factors associated with NRT in  
10 non-disabled individuals. Among these, dental floss use is the most malleable  
11 component that can be addressed by instructions by public health practitioners. This  
12 study found that most disabled adults (77.4%) lacked the habit of cleaning teeth after  
13 meals, and brushed their teeth less than twice a day. The practice of dental flossing  
14 may be a complementary oral hygiene step that can help to maintain the NRT. A  
15 previous systematic review has confirmed that brushing and flossing can significantly  
16 reduce plaque and gingivitis as compared with tooth brushing alone.<sup>14</sup>

17 It is the presence of dental plaque and food debris in the crevices between the  
18 teeth that encourage bacteria to flourish, activating the inflammatory response and the  
19 innate immune system in the human body. These bacteria induce swelling and  
20 bleeding of the gums, the destruction of periodontal tissues and alveolar bones, and  
21 the promotion of tooth mobility; thus, ultimately causing tooth loss.<sup>33-34</sup> The findings  
22 from some systematic reviews suggest that oral hygiene methods, such as tooth  
23 brushing, dental flossing, and/or interdental brushing are all effective means of  
24 extinguishing the periodontal pathogens thriving in the buccal cavity<sup>14, 35</sup> and even in  
25 the blood.<sup>36</sup>



1  
2  
3  
4 1 However, people with disabilities may have difficulties flossing owing to  
5  
6 2 disability-related issues with self-control, movement coordination, comprehension,  
7  
8 3 etc., although nearly 90% of them in this study were categorized as having basic  
9  
10 4 self-care ability in ADL. Adopting a habit of dental flossing, and accuracy and  
11  
12 5 thoroughness of dental cleaning processes, may even be demanding for some  
13  
14 6 non-disabled people, as well as for adults with disabilities. The assistance of  
15  
16 7 interdental brushing, which is recognized as an easier and more effective method for  
17  
18 8 reducing periodontal pathogens,<sup>35</sup> can also be considered as an alternative approach.

19  
20  
21 9 To address the problem of NRT < 20, oral hygiene instruction, a commonly used  
22  
23 10 clinical technique, is imperative for improving oral hygiene. Since disabled adults  
24  
25 11 may not cope with regular dental visits and examinations, integration of preventive  
26  
27 12 and corrective oral health in their lives is highly beneficial.<sup>30</sup> Routine daily teeth  
28  
29 13 cleaning is undoubtedly the most economic and convenient approach to ensure oral  
30  
31 14 health. It can also reduce the fear of individuals with disabilities about accessing oral  
32  
33 15 health services, and even shorten the scaling time required.<sup>37</sup> Unfortunately, previous  
34  
35 16 studies have demonstrated that community-dwelling individuals with disabilities have  
36  
37 17 worse oral health than those living in institutions.<sup>22 38</sup> Since these participants were  
38  
39 18 living at home with relatives, their families were generally more concerned with  
40  
41 19 physiological diseases than with oral conditions, and were not aware of the  
42  
43 20 importance of oral hygiene. Teeth cleaning was also typically perceived as the  
44  
45 21 individuals' own responsibility, as these disabled people generally seemed to be  
46  
47 22 capable of managing the task. However, they had a higher prevalence of an NRT < 20,  
48  
49 23 which may imply that even if the participants had basic self-care ability, it does not  
50  
51 24 mean that are capable of achieving good quality oral hygiene. Their families  
52  
53 25 sometimes opted to ignore these "trivial" matters, as they were already exhausted by  
54  
55  
56  
57  
58  
59  
60

1 the burden of care. Consequently, without professional guidance and tracking, daily  
2 cleaning of the teeth becomes a difficult task for community-based people with  
3 disabilities. A systematic review has concluded that additional oral hygiene instruction  
4 could help cultivate a higher quality of oral health behaviors; thus, ameliorating  
5 gingivitis and eradicating dental plaque.<sup>31</sup>

6 As many researchers claim that good oral health can improve almost every  
7 aspect of life, from overall health to self-esteem, communication, nutrition, quality of  
8 life, savings in medical expenses, and finding employment, for people with  
9 disabilities, in addition to relieving the burden on their care givers.<sup>17, 39</sup> To achieve the  
10 oral health goal of 8020,<sup>3</sup> more resources and attention should be invested to provide  
11 good oral care matched to the individual's disability characteristics. Further  
12 integration of the social welfare networks, oral hygiene instructions, and coordination  
13 of medical professionals and caregivers for adults with disabilities are recommended.

#### 14 **Limitations**

15 This study has some limitations. First, the participants' oral conditions were  
16 examined by research assistants, rather than by qualified dentists, owing to constraints  
17 on the participants' cooperation and expectations. Only superficial features, such as  
18 the remaining number of natural and filled teeth were investigated; other thorough  
19 evaluations like those of caries and periodontal tissues, were not performed. Thus,  
20 potential oral problems may have been ignored or underestimated by the NRT figures  
21 reported here. Second, some selection bias may have been involved as the criteria for  
22 inclusion included the ability to travel from home to the nearby school where the  
23 examinations were conducted. The participants were mostly categorized as having  
24 mild disabilities, with limited variation. Their oral health conditions should thus be  
25 presumed to be generally better than those of individuals with more severe

1 disabilities,<sup>27</sup> who were not included in this survey. The real situation of oral health  
2 for adults with disabilities may thus be even worse than that indicated by this study.  
3 Third, the self-report health behaviors questionnaire might trigger socially desired  
4 behaviors from participants implicitly directed by the research and/or researchers.  
5 Fourth, the participants were conveniently recruited from one location, rather than by  
6 nationwide cluster sampling. The generalizability of the study results may therefore  
7 be limited. Finally, the cross-sectional study design has inherent limits in terms of  
8 investigating the causal inferences between variables. As it is a snapshot of a specific  
9 moment, the cross-sectional design did not track variables over a period of time to  
10 gain insight into the process. To address this limitation, we asked participants to recall  
11 their oral health behavior over the past year and/or when they were dentate. However,  
12 the recall process might generate another bias due to poor memory recall.

### 13 CONCLUSION

14 For community-dwelling individuals with disabilities, the prevalence of an NRT  
15 < 20 was significantly greater than that reported in previous studies. Poor oral hygiene  
16 behaviors were identified as being a general characteristic of the participants. Adults  
17 with intellectual disability had a greater likelihood of tooth loss. The other two factors  
18 strongly associated with an NRT < 20 were the habit of seldom using dental floss and  
19 hypertension. As oral hygiene instructions are the least expensive and easiest way of  
20 integrating preventative intervention options for chronic diseases into daily activities,  
21 professionals should concentrate on this approach for individuals with disabilities and  
22 attempt to enhance their teeth cleaning awareness and capabilities. Finally, to satisfy  
23 the oral health needs of community-dwelling adults with disabilities, issues such as  
24 the risk factors associated with different types of disabilities, regular dental visits, and  
25 their special needs can be further explored.

1  
2  
3  
4 **1 Conflict of interest**

5  
6  
7 2 The authors declare that they have no competing interests.

8  
9 **3 Authors' contributions**

10  
11 4 MYP and TCH: designing the study, collecting and analyzing data, and drafting the  
12  
13 5 paper. HCT and YCL: proofreading and revising the manuscripts. MYC: initializing,  
14  
15 6 conceptualizing, and supervising the research process. All authors have read and  
16  
17 7 approved the final manuscript.

18  
19  
20 **8 Acknowledgments**

21  
22 9 We thank all participants in this study and staff at the Chiayi Bureau of Health  
23  
24 10 Promotion for their support, which made this study possible.

25  
26  
27 **11 Funding**

28  
29 12 The study was supported by a grant from Chang Gung Memorial Hospital (BMRP  
30  
31 13 148).

32  
33 **14 Patient consent**

34  
35 15 Obtained

36  
37 **16 Ethics approval**

38  
39 17 This study was approved by the institutional review board of the ethical committee of  
40  
41  
42 18 Chang Gung Memorial Hospital (IRB 102-3331B).

43  
44 **19 Data sharing statement** No additional data are available.

45  
46  
47 20

## 1 REFERENCES

- 2 1. Wang TF, Chen YY, Liou YM, et al. Investigating tooth loss and associated factors  
3 among older Taiwanese adults. *Arch Gerontol Geriatr* 2014;58(3):446-53.
- 4 2. Leroy R, Declerck D. Objective and subjective oral health care needs among adults  
5 with various disabilities. *Clin Oral Investig* 2013;17(8):1869-78.
- 6 3. Yamanaka K, Nakagaki H, Morita I, et al. Comparison of the health condition  
7 between the 8020 achievers and the 8020 non-achievers. *Int Dent J*  
8 2008;58(3):146-50.
- 9 4. Marcenes W, Kassebaum NJ, Bernabe E, et al. Global burden of oral conditions in  
10 1990-2010: a systematic analysis. *J Dent Res* 2013;92(7):592-7.
- 11 5. Linden GJ, Lyons A, Scannapieco FA. periodontal systemic associations: review of  
12 the evidence. *J Clin Periodontol* 2013;40(Suppl. 14):S8-19.
- 13 6. Hayasaka K, Tomata Y, Aida J, et al. Tooth Loss and Mortality in Elderly Japanese  
14 Adults: Effect of Oral Care. *J Am Geriatr Soc* 2013;61(5):815-20.
- 15 7. Huang J-C, Peng Y-S, Fan J-Y, et al. Factors associated with numbers of remaining  
16 teeth among type 2 diabetes: a cross-sectional study. *J Clin Nurs*  
17 2013;22(13-14):1926-32.
- 18 8. Hsu K-J, Yen Y-Y, Lan S-J, et al. Impact of oral health behaviours and oral habits  
19 on the number of remaining teeth in older Taiwanese dentate adults. *Oral Health*  
20 *Prev Dent* 2013;11(2):121-30.
- 21 9. Mac Giolla Phadraig C, McCallion P, Cleary E, et al. Total tooth loss and complete  
22 denture use in older adults with intellectual disabilities in Ireland. *J Public Health*  
23 *Dent* 2015;75(2):101-8.
- 24 10. Tsai SJ, Lin MS, Chiu WN, et al. Factors associated with having less than 20  
25 natural teeth in rural adults: a cross-sectional study. *BMC Oral Health*  
26 2015;15:158.
- 27 11. Jiang Y, Okoro CA, Oh J, et al. Sociodemographic and health-related risk factors  
28 associated with tooth loss among adults in Rhode Island. *Prev Chronic Dis*  
29 2013;10:E45.
- 30 12. Bachkati K, Mortensen E, Brønnum-Hansen H, et al. Poor Oral Health in Late  
31 Life: Selected Predictors and Initiatives Towards Prevention of Tooth Loss. *J*  
32 *Gerontol Geriatr Res* 2017;6(2):398.
- 33 13. Yoshino K, Ito K, Kuroda M, et al. Tooth Loss in Problem-oriented, Irregular, and  
34 Regular Attenders at Dental Offices. *Bull Tokyo Dent Coll* 2016;57(1):11-9.
- 35 14. Sambunjak D, Nickerson Jason W, Poklepovic T, et al. Flossing for the  
36 management of periodontal diseases and dental caries in adults. *Cochrane*  
37 *Database Syst Rev* 2011(12):CD008829.

- 1 15. Islas-Granillo H, Borges-Yanez A, Medina-Solis CE, et al. Tooth-Loss  
2 Experience and Associated Variables among Adult Mexicans 60 Years and  
3 Older. *P R Health Sci J* 2016;35(2):88-92.
- 4 16. Armour BS, Swanson M, Waldman HB, et al. A profile of state-level differences  
5 in the oral health of people with and without disabilities, in the U.S., in 2004.  
6 *Public health reports* 2008;123(1):67-75.
- 7 17. Hall JP, Chapman SL, Kurth NK. Poor oral health as an obstacle to employment  
8 for Medicaid beneficiaries with disabilities. *J Public Health Dent*  
9 2013;73(1):79-82.
- 10 18. Oliveira JS, Prado Júnior RR, de Sousa Lima KR, et al. Intellectual disability and  
11 impact on oral health: a paired study. *Special Care in Dentistry*  
12 2013;33(6):262-8.
- 13 19. Ameer N, Palaparathi R, Neerudu M, et al. Oral hygiene and periodontal status of  
14 teenagers with special needs in the district of Nalgonda, India. *J Indian Soc*  
15 *Periodontol* 2012;16(3):421-5.
- 16 20. Cumella S, Ransford N, Lyons J, et al. Needs for oral care among people with  
17 intellectual disability not in contact with Community Dental Services. *J Intellect*  
18 *Disabil Res* 2000;44(1):45-52.
- 19 21. Anders PL, Davis EL. Oral health of patients with intellectual disabilities: a  
20 systematic review. *Spec Care Dentist* 2010;30(3):110-7.
- 21 22. Morgan JP, Minihan PM, Stark PC, et al. The oral health status of 4,732 adults  
22 with intellectual and developmental disabilities. *J Am Dent Assoc*  
23 2012;143(8):838-46.
- 24 23. Turner S, Sweeney M, Kennedy C, et al. The oral health of people with  
25 intellectual disability participating in the UK Special Olympics. *J Intellect*  
26 *Disabil Res* 2008;52(1):29-36.
- 27 24. Havercamp SM, Scott HM. National health surveillance of adults with disabilities,  
28 adults with intellectual and developmental disabilities, and adults with no  
29 disabilities. *Disabil Health J* 2015;8(2):165-72.
- 30 25. World Health Organization (WHO). *Disabilities*.  
31 <http://www.who.int/topics/disabilities/en/>. (accessed 28 December 2016)
- 32 26. Ministry of Health and Welfare, Taiwan. *Statistics of General Health and*  
33 *Welfare*. [http://www.mohw.gov.tw/EN/Ministry/Statistic.aspx?f\\_list\\_no=474](http://www.mohw.gov.tw/EN/Ministry/Statistic.aspx?f_list_no=474).  
34 (accessed 28 January 2017)
- 35 27. Lai H-T, Kung P-T, Su H-P, et al. Examining related influential factors for dental  
36 calculus scaling utilization among people with disabilities in Taiwan, a  
37 nationwide population-based study. *Res Dev Disabil* 2014;35(9):2231-40.

- 1  
2  
3  
4  
5 1 28. National Health Insurance Administration (NHI), Taiwan. *Medical services,*  
6 2 *assistances & cares.*  
7 3 [http://www.nhi.gov.tw/English/index.aspx?menu=8&menu\\_id=30&webdata\\_id=](http://www.nhi.gov.tw/English/index.aspx?menu=8&menu_id=30&webdata_id=0&WD_ID=30)  
8 4 [0&WD\\_ID=30](http://www.nhi.gov.tw/English/index.aspx?menu=8&menu_id=30&webdata_id=0&WD_ID=30). (accessed 5 April 2017)  
9  
10 5 29. Health Promotion Administration, Ministry of Health and Welfare. *Survey on the*  
11 6 *prevalence of hypertension, hyperglycemia and hyperlipidemia in Taiwan.*  
12 7 [http://www.hpa.gov.tw/BHPNet/Web/HealthTopic/Topic.aspx?id=20140929000](http://www.hpa.gov.tw/BHPNet/Web/HealthTopic/Topic.aspx?id=201409290001)  
13 8 1. (accessed 28 January 2017)  
14  
15 9 30. Gabre P, Martinsson T, Gahnberg L. Longitudinal study of dental caries, tooth  
16 10 mortality and interproximal bone loss in adults with intellectual disability. *Eur J*  
17 11 *Oral Sci* 2001;109(1):20-6.  
18  
19 12 31. Worthington Helen V, Clarkson Jan E, Bryan G, et al. Routine scale and polish for  
20 13 periodontal health in adults. *Cochrane Database Syst Rev* 2013(11):CD004625.  
21  
22 14 32. Lindsay P. *Care of the Adult with Intellectual Disability in Primary Care*. London,  
23 15 UK: Radcliffe Pub. 2011.  
24  
25 16 33. Di Benedetto A, Gigante I, Colucci S, et al. Periodontal disease: linking the  
26 17 primary inflammation to bone loss. *Clin Dev Immunol* 2013;2013(503754): 1-7.  
27  
28 18 34. Graves DT, Li J, Cochran DL. Inflammation and uncoupling as mechanisms of  
29 19 periodontal bone loss. *J Dent Res* 2011;90(2):143-53.  
30  
31 20 35. Poklepovic T, Worthington Helen V, Johnson Trevor M, et al. Interdental  
32 21 brushing for the prevention and control of periodontal diseases and dental caries  
33 22 in adults. *Cochrane Database Syst Rev* 2013(12):Cd009857.  
34  
35 23 36. Marín M-J, Figuero E, González I. Comparison of the detection of periodontal  
36 24 pathogens in bacteraemia after tooth brushing by culture and molecular  
37 25 techniques. *Medicina oral, patologia oral y cirugia bucal* 2016;21(3):e276-84.  
38  
39 26 37. Kim MJ, Noh H, Oh HY. Efficiency of professional tooth brushing before  
40 27 ultrasonic scaling. *Int J Dent Hyg* 2015;13(2):125-31.  
41  
42 28 38. Bershadsky J, Kane RL. Place of residence affects routine dental care in the  
43 29 intellectually and developmentally disabled adult population on Medicaid. *Health*  
44 30 *Serv Res* 2010;45(5p1):1376-89.  
45  
46 31 39. Elliott I, Nunn J, Sadlier D. *Oral health & disability: the way forward Ireland:*  
47 32 *National Disability Authority; 2005*  
48 33 [http://nda.ie/Image-Library/PDF-Downloads/PDF-Version-Oral-Health-The-Way](http://nda.ie/Image-Library/PDF-Downloads/PDF-Version-Oral-Health-The-Way-Forward-939-KB-.pdf)  
49 34 [-Forward-939-KB-.pdf](http://nda.ie/Image-Library/PDF-Downloads/PDF-Version-Oral-Health-The-Way-Forward-939-KB-.pdf). (accessed 10, August 2016)  
50  
51  
52  
53  
54  
55  
56  
57  
58  
59  
60

## STROBE Statement—checklist of items that should be included in reports of observational studies

|                              | Item No | Recommendation                                                                                                                                                                                                                                                                                                                                                                                                                                                                                                                                                                                                                                                                                   |
|------------------------------|---------|--------------------------------------------------------------------------------------------------------------------------------------------------------------------------------------------------------------------------------------------------------------------------------------------------------------------------------------------------------------------------------------------------------------------------------------------------------------------------------------------------------------------------------------------------------------------------------------------------------------------------------------------------------------------------------------------------|
| <b>Title and abstract</b>    | p1-3    | (a) Indicate the study's design with a commonly used term in the title or the abstract<br>(b) Provide in the abstract an informative and balanced summary of what was done and what was found                                                                                                                                                                                                                                                                                                                                                                                                                                                                                                    |
| <b>Introduction</b>          |         |                                                                                                                                                                                                                                                                                                                                                                                                                                                                                                                                                                                                                                                                                                  |
| Background/rationale         | P4-5    | Explain the scientific background and rationale for the investigation being reported                                                                                                                                                                                                                                                                                                                                                                                                                                                                                                                                                                                                             |
| Objectives                   | p5      | State specific objectives, including any prespecified hypotheses                                                                                                                                                                                                                                                                                                                                                                                                                                                                                                                                                                                                                                 |
| <b>Methods</b>               |         |                                                                                                                                                                                                                                                                                                                                                                                                                                                                                                                                                                                                                                                                                                  |
| Study design                 | P6      | Present key elements of study design early in the paper                                                                                                                                                                                                                                                                                                                                                                                                                                                                                                                                                                                                                                          |
| Setting                      | P6      | Describe the setting, locations, and relevant dates, including periods of recruitment, exposure, follow-up, and data collection                                                                                                                                                                                                                                                                                                                                                                                                                                                                                                                                                                  |
| Participants                 | P6      | (a) <i>Cohort study</i> —Give the eligibility criteria, and the sources and methods of selection of participants. Describe methods of follow-up<br><i>Case-control study</i> —Give the eligibility criteria, and the sources and methods of case ascertainment and control selection. Give the rationale for the choice of cases and controls<br><i>Cross-sectional study</i> —Give the eligibility criteria, and the sources and methods of selection of participants<br>(b) <i>Cohort study</i> —For matched studies, give matching criteria and number of exposed and unexposed<br><i>Case-control study</i> —For matched studies, give matching criteria and the number of controls per case |
| Variables                    | P6-8    | Clearly define all outcomes, exposures, predictors, potential confounders, and effect modifiers. Give diagnostic criteria, if applicable                                                                                                                                                                                                                                                                                                                                                                                                                                                                                                                                                         |
| Data sources/<br>measurement | P6-8    | For each variable of interest, give sources of data and details of methods of assessment (measurement). Describe comparability of assessment methods if there is more than one group                                                                                                                                                                                                                                                                                                                                                                                                                                                                                                             |
| Bias                         |         | Describe any efforts to address potential sources of bias                                                                                                                                                                                                                                                                                                                                                                                                                                                                                                                                                                                                                                        |
| Study size                   |         | Explain how the study size was arrived at                                                                                                                                                                                                                                                                                                                                                                                                                                                                                                                                                                                                                                                        |
| Quantitative variables       | P6-8    | Explain how quantitative variables were handled in the analyses. If applicable, describe which groupings were chosen and why                                                                                                                                                                                                                                                                                                                                                                                                                                                                                                                                                                     |
| Statistical methods          | P9-10   | (a) Describe all statistical methods, including those used to control for confounding<br>(b) Describe any methods used to examine subgroups and interactions<br>(c) Explain how missing data were addressed<br>(d) <i>Cohort study</i> —If applicable, explain how loss to follow-up was addressed<br><i>Case-control study</i> —If applicable, explain how matching of cases and controls was addressed<br><i>Cross-sectional study</i> —If applicable, describe analytical methods taking account of sampling strategy<br>(e) Describe any sensitivity analyses                                                                                                                                |

Continued on next page



**Results**

|                  |        |                                                                                                                                                                                                                                                                                                                                                                                                               |
|------------------|--------|---------------------------------------------------------------------------------------------------------------------------------------------------------------------------------------------------------------------------------------------------------------------------------------------------------------------------------------------------------------------------------------------------------------|
| Participants     | P10    | (a) Report numbers of individuals at each stage of study—eg numbers potentially eligible, examined for eligibility, confirmed eligible, included in the study, completing follow-up, and analysed<br>(b) Give reasons for non-participation at each stage<br>(c) Consider use of a flow diagram                                                                                                               |
| Descriptive data | P10–11 | (a) Give characteristics of study participants (eg demographic, clinical, social) and information on exposures and potential confounders<br>(b) Indicate number of participants with missing data for each variable of interest<br>(c) <i>Cohort study</i> —Summarise follow-up time (eg, average and total amount)                                                                                           |
| Outcome data     | P12–13 | <i>Cohort study</i> —Report numbers of outcome events or summary measures over time<br><i>Case-control study</i> —Report numbers in each exposure category, or summary measures of exposure<br><i>Cross-sectional study</i> —Report numbers of outcome events or summary measures                                                                                                                             |
| Main results     | p13–16 | (a) Give unadjusted estimates and, if applicable, confounder-adjusted estimates and their precision (eg, 95% confidence interval). Make clear which confounders were adjusted for and why they were included<br>(b) Report category boundaries when continuous variables were categorized<br>(c) If relevant, consider translating estimates of relative risk into absolute risk for a meaningful time period |
| Other analyses   |        | Report other analyses done—eg analyses of subgroups and interactions, and sensitivity analyses                                                                                                                                                                                                                                                                                                                |

**Discussion**

|                  |        |                                                                                                                                                                            |
|------------------|--------|----------------------------------------------------------------------------------------------------------------------------------------------------------------------------|
| Key results      | p16–20 | Summarise key results with reference to study objectives                                                                                                                   |
| Limitations      | P20    | Discuss limitations of the study, taking into account sources of potential bias or imprecision. Discuss both direction and magnitude of any potential bias                 |
| Interpretation   | p16–20 | Give a cautious overall interpretation of results considering objectives, limitations, multiplicity of analyses, results from similar studies, and other relevant evidence |
| Generalisability | P22    | Discuss the generalisability (external validity) of the study results                                                                                                      |

**Other information**

|         |     |                                                                                                                                                               |
|---------|-----|---------------------------------------------------------------------------------------------------------------------------------------------------------------|
| Funding | P22 | Give the source of funding and the role of the funders for the present study and, if applicable, for the original study on which the present article is based |
|---------|-----|---------------------------------------------------------------------------------------------------------------------------------------------------------------|

\*Give information separately for cases and controls in case-control studies and, if applicable, for exposed and unexposed groups in cohort and cross-sectional studies.

**Note:** An Explanation and Elaboration article discusses each checklist item and gives methodological background and published examples of transparent reporting. The STROBE checklist is best used in conjunction with this article (freely available on the Web sites of PLoS Medicine at <http://www.plosmedicine.org/>, Annals of Internal Medicine at <http://www.annals.org/>, and Epidemiology at <http://www.epidem.com/>). Information on the STROBE Initiative is available at [www.strobe-statement.org](http://www.strobe-statement.org).

# BMJ Open

## Prevalence of and factors associated with fewer than 20 remaining teeth in Taiwanese adults with disabilities: A community-based cross-sectional study

|                                 |                                                                                                                                                                                                                              |
|---------------------------------|------------------------------------------------------------------------------------------------------------------------------------------------------------------------------------------------------------------------------|
| Journal:                        | <i>BMJ Open</i>                                                                                                                                                                                                              |
| Manuscript ID                   | bmjopen-2017-016270.R2                                                                                                                                                                                                       |
| Article Type:                   | Research                                                                                                                                                                                                                     |
| Date Submitted by the Author:   | 05-Jul-2017                                                                                                                                                                                                                  |
| Complete List of Authors:       | Pan, Mei-Yu ; Chang Gung University of Science and Technology - Chiayi Campus<br>Hsieh, Tsung-Cheng<br>Tai, Hung-Cheng<br>Lin, Yu-Chen<br>Chen, Mei-Yen; Chang Gung University of Science and Technology, Nursing Department |
| <b>Primary Subject Heading</b>: | Dentistry and oral medicine                                                                                                                                                                                                  |
| Secondary Subject Heading:      | Nursing, Public health, Health services research                                                                                                                                                                             |
| Keywords:                       | Disabilities, number of remaining teeth, health promotion, oral hygiene                                                                                                                                                      |
|                                 |                                                                                                                                                                                                                              |

SCHOLARONE™  
Manuscripts

1  
2  
3  
4 **Prevalence of and factors associated with fewer than 20 remaining teeth in**  
5  
6 **Taiwanese adults with disabilities: A community-based cross-sectional study**  
7

8 †Mei-Yu Pan, RN, MSN, Department of Nursing, Chang Gung University of Science  
9 and Technology, Chiayi, Taiwan.

10  
11 PhD, candidate, Institute of Medical Sciences, Tzu Chi University, Hualien,  
12  
13 Taiwan.  
14

15  
16  
17 †Tsung-Cheng Hsieh, PhD, Institute of Medical Sciences, Tzu Chi University, Hualien,  
18  
19 Taiwan.  
20

21  
22 Hung-Cheng Tai, Department of General Education, Chang Gung University of  
23  
24 Science and Technology, Chiayi, Taiwan.  
25

26  
27 Yu-Chen Lin, MS, RN, Director, Department of Health Promotion, Chiayi Bureau of  
28  
29 Health, Taiwan.  
30

31  
32 Mei-Yen Chen, RN, PhD, Professor, College of Nursing, Chang Gung University of  
33  
34 Science and Technology, Chiayi, Taiwan.

35  
36 Research Fellow in Chang Gung Memorial Hospital, Chiayi, Taiwan.

37  
38 Department of Nursing, Chang Gung University, Taoyuan, Taiwan.  
39

40 † **Equal contribution**

41  
42 **Corresponding author:**

43  
44 Address Correspondence to: Mei-Yen Chen, No. 2, Chiapu Rd. West Sec., Putz City,  
45  
46 Chiayi County 61363, Taiwan. Tel: +886 (5) 3628800 ext. 2201; Fax: +886 (5)  
47  
48 3628866. E-mail: [meiyen@mail.cgust.edu.tw](mailto:meiyen@mail.cgust.edu.tw)  
49

50  
51 **Keywords**

52  
53 Disabilities; number of remaining teeth; edentulous; health promotion; oral hygiene

54  
55 Word count: 4456  
56  
57  
58  
59  
60

## ABSTRACT

**Objectives:** To examine the prevalence of and the factors associated with a number of remaining teeth (NRT) < 20 among adults with disabilities.

**Design:** A community-based, cross-sectional descriptive study.

**Setting:** This study was part of a health-promotion program designed for community-dwelling adults with disabilities.

**Participants:** A total of 549 adults with disabilities, aged 20–80 years, living in the community in Chiayi County in Taiwan.

**Outcome measures:** Various parameters, including NRT, oral health behaviors (i.e., oral hygiene, dietary habits, and substance use), comorbidities, disability classification, and capability for performing activities of daily living, were measured. Data were statistically analyzed using descriptive statistics and multivariate logistic regression analysis.

**Results:** The mean NRT was 18.1 (standard deviation = 10.9); 44.9% of participants had NRT < 20 (including 13.7% edentulous participants). Most participants had poor oral hygiene: 83% reported seldom using dental floss, 78% did not undergo regular 6-monthly dental check-ups, and 77.4% seldom brushed their teeth after meal. After adjusting for potentially confounding variables, the intellectual disability group had a significantly higher risk of an NRT < 20 than the physical disability group (odds ratio: 2.30,  $p = 0.004$ ). Additionally, the rare use of dental floss and hypertension significantly increased the possibility of an NRT < 20 (odds ratio: 1.73-2.12,  $p = 0.008-0.009$ ).

**Conclusions:** An NRT < 20 and edentulism were highly prevalent among adults with disabilities, who displayed poor oral hygiene behaviors. Adults with intellectual

1  
2  
3  
4 disabilities had a greater likelihood of having an NRT < 20 than did those with  
5  
6 physical disability. In addition to unmodifiable factors, the poor use of dental floss  
7  
8 was significantly associated with an NRT < 20.  
9

### 10 11 12 13 **Strengths and limitations of this study**

- 14 ● Few studies have reported the prevalence of and factors associated with few  
15 remaining teeth among adults with disabilities, particularly in those residing in  
16 communities.  
17
- 18 ● These results highlight the value of nurse-led health promotion programs and  
19 implementation of a multidisciplinary approach for the early detection of a low  
20 number of remaining teeth in community-dwelling adults with disabilities.  
21
- 22 ● The limitations of the study include the non-randomized sampling strategy and  
23 recruitment of individuals with disabilities that did not preclude mobility in  
24 coming to the examination center, may hinder generalization of our findings.  
25
- 26 ● Other shortcomings regarding self- and/or caregiver-reported behaviors are  
27 social desirability, and the recall process might involve biases due to poor  
28 memory retrieval.  
29  
30  
31  
32  
33  
34  
35  
36  
37  
38  
39  
40  
41  
42  
43  
44  
45  
46  
47  
48  
49  
50  
51  
52  
53  
54  
55  
56  
57  
58  
59  
60

## 1 INTRODUCTION

2 Having 20 teeth or more helps adults maintain good oral function and overall  
3 health. Teeth are recognized as calcified structures in the mouth, with the primary  
4 purpose of mastication, but act as part of the broader digestive system, to help the  
5 body obtain nutrition.<sup>1-3</sup> Other key functional aspects of teeth include speaking and  
6 communication, facial appearance, facilitating interpersonal relationships, enhancing  
7 quality of life, systemic health, and cognitive function; teeth are also associated with  
8 disability status, and even with mortality.<sup>3-6</sup> Unfortunately, 3.9 billion individuals  
9 worldwide experience oral disorders, including untreated caries, severe periodontal  
10 disease, and severe tooth loss, thereby prolonging the years lived with disability.<sup>4</sup> In  
11 fact, as early as 1991, Japan conducted a series of oral campaigns called the “8020” to  
12 encourage citizens to maintain at least 20 remaining teeth through the age of 80.<sup>3</sup>  
13 Previous studies on elderly people also proved that the lower the number of remaining  
14 teeth (NRT), the greater the impacts on individuals’ health. These impacts include the  
15 higher risks of cognitive impairments, decreased self-care capabilities, heart rate  
16 acceleration, influences on the quality of life, and decreased cumulative survival  
17 rate.<sup>1,3</sup> The issue of the NRT has become an important indicator of oral and overall  
18 health for adults.

19 Awareness of the factors associated with an NRT < 20 forms the basis for good  
20 oral care. Of all the risk factors for an NRT < 20, age is probably the primary  
21 factor,<sup>7-10</sup> but it is not a controllable or reversible factor, neither are sex and  
22 education.<sup>10-12</sup> Therefore, public health professionals concentrate on risk factors that  
23 can be modified. Other factors associated with tooth loss include hypertension,  
24 diabetes mellitus, hyperlipidemia, poor oral hygiene, unhealthy diet, smoking, and  
25 harmful alcohol consumption,<sup>10-11, 13-15</sup> but those that are specific for individuals with

1 disabilities remain unclear.

2       The oral health condition of disabled individuals is often worse than that of  
3 non-disabled adults.<sup>2, 16-23</sup> Utilization of oral health services is also far lower than the  
4 average for this group.<sup>16-17, 24</sup> The World Health Organization has warned that, as the  
5 population ages and chronic diseases increase, there will be an increase in the rate of  
6 disability. Currently, more than a billion people worldwide (15%) live with some form  
7 of disability, with 2–4% of those over the age of 15 years having significant  
8 difficulties in functioning. In addition, due to poverty and difficulties with mobility,  
9 the disabled are particularly vulnerable in terms of accessing satisfactory health care  
10 services. They are also more likely to engage in risky health behaviors and to be  
11 affected by more complications, more comorbidities, faster degeneration, and earlier  
12 mortality.<sup>25</sup> In Taiwan, there are more than 1.1 million people with disabilities (4.8%  
13 of the population).<sup>26</sup> Research has shown that disabled adults rarely use oral health  
14 services,<sup>27</sup> even though the government has already increased their oral care services.  
15 These premium subsidies funded by the National Health Insurance (NHI) system  
16 include use of fluoride gel/varnishes, more frequent dental scaling, and a bonus for  
17 the dentists treating patients with specific disabilities.<sup>28</sup> In terms of human rights,  
18 preventing the increase in levels of disability, as well as reducing the caregivers'  
19 burdens, which are issues relating to oral health care for vulnerable groups, deserve  
20 much attention.

21       However, although some previous studies have focused on  
22 institution-accommodated adults with disabilities,<sup>2, 18</sup> fewer reports have discussed  
23 disabled individuals living in communities. The prevalence of NRT < 20 and factors  
24 potentially relevant to the oral health among non-institutional disabilities were also  
25 seldom discussed. Therefore, the aims of this study were to explore the prevalence of

1 and factors associated with an NRT < 20 among community-dwelling adults with  
2 disabilities in Taiwan, and explore the oral health behaviors among the participants.

## 3 4 **METHODS**

### 5 **Design, sample, and setting**

6 This study, which was part of a second-year health-promotion program designed  
7 for community-dwelling adults with disabilities, was led by a nursing team in  
8 collaboration with a district hospital and the Bureau of Health Promotion of Chiayi  
9 County in Taiwan.<sup>25</sup> In Chiayi County, visual impairment, hearing impairment,  
10 intellectually disability, and physical disability affect more than 38,800 individuals,  
11 accounting for 64% of the local disabled population. This paper forms part of a series  
12 of reports regarding health issues of community-based people with disabilities. A  
13 community-based health screening survey was conducted between July and December  
14 in 2014 using a cross-sectional descriptive design.

15 Participants were selected through convenience sampling from the registry of the  
16 government's social welfare center.<sup>21</sup> The inclusion criteria were: (1) certified adults'  
17 primary disability, involving either visual impairment, hearing impairment,  
18 intellectual disability, or physical disability; (2) age  $\geq$  20 years; (3) the ability to  
19 complete the written questionnaire in either Mandarin or Taiwanese, with assistance  
20 from the interviewers; (4) the ability to walk to the examination center with/without  
21 help; and (5) the ability to sign the consent forms prior to recruitment. Exclusion  
22 criteria were: (1) living in institutions; (2) an inability to answer questions; or (3)  
23 having a serious disease, such as kidney disease requiring dialysis or cancer.

### 24 **Measurements**

25 1. *Number of remaining teeth (NRT)*: The NRT was obtained by research



1 assistants by asking the participants to open his/her mouths and then counting the total  
2 number of natural teeth and fixed dentures, after discharging the removable dentures  
3 in the oral cavities. Root fragments without a crown were excluded. As edentulism is  
4 an alternative measure of oral health status,<sup>29</sup> it was distinguished as an outcome to  
5 present a fuller picture of NRT. Thus, three categories, edentulous (NRT = 0),  
6 less-dentate (NRT = 1-19), and more-dentate (NRT  $\geq$  20) were defined. The  
7 edentulous and less-dentate groups are referred to as those with fewer teeth (NRT <  
8 20).

9       2. *Oral health behaviors:* Oral health behaviors were measured in terms of  
10 seven habits, i.e., brushing teeth, using dental floss, visiting dentists or undergoing  
11 dental scaling, drinking alcohol, smoking, five groups of nutrition, and water intake.  
12 This information was collected through standardized personal interviews using a  
13 structured questionnaire that was based on the published literature.<sup>7, 10</sup> The  
14 participants were asked to recall their oral health behaviors up to a year previously  
15 and/or when they were dentate.

16       In this study, answers regarding the brushing of teeth were categorized as  
17 frequent ( $\geq$  twice a day) vs. infrequent (< twice a day). As for immediate brushing  
18 teeth after a meal, participants were classified as “often” if they responded with  
19 “usually” or “frequently”, or “seldom” if they responded with “never” or  
20 “sometimes”. For using dental floss, responses were classified as “often” if dental  
21 floss was used to clean interdental spaces  $\geq$  once a day, or “seldom” if the  
22 respondents’ answer was “never” or “sometimes.” Regarding visits to dentists,  
23 participants were classified as “regular” if they visited dentists and underwent scaling  
24 every 6 months, or “irregular” if they responded “never” or “sometimes.” For  
25 questions “Do you smoke cigarettes or drink alcohol?”, participants were classified as

1 “none or formerly” if they had never engaged in these behaviors or had stopped  
2 doing so for the past year, or as “current users.” Regarding five groups of nutrition  
3 intake, the response was considered “balanced” if the respondents usually or always  
4 had five groups of nutrition (i.e., meat, milk, grains, vegetables, and fruit) each day, or  
5 “unbalanced” if they never or sometimes had these foods. In terms of water intake,  
6 answers were categorized as sufficient ( $\geq 1500$  mL per day) vs. insufficient ( $< 1500$   
7 mL per day). Participants, especially those intellectual and hearing disabled, were  
8 guided to reply their habits through visual aids, samples, progressive interactions, and  
9 caregivers’ confirmations when necessary.

10 3. *Background information:* Background information comprised three  
11 sections. First, demographic variables obtained from the questionnaires, including  
12 age, gender, and educational attainment (years of education received, or level of  
13 school completed). Second, prevalence of the three common chronic diseases (i.e.,  
14 hypertension, diabetes mellitus, and hyperlipidemia). The three diseases were  
15 assessed using a medical history (diagnosed by a physician) and/or physiological  
16 biomarkers, including blood pressure (BP), fasting blood glucose (FBG), triglyceride  
17 (TG), total cholesterol (TC), low-density lipoprotein (LDL) cholesterol, and  
18 high-density lipoprotein (HDL) cholesterol levels. Following the national standard of  
19 the Ministry of Health and Welfare,<sup>30</sup> blood samples were evaluated and BP was  
20 measured at the time of the study, applying standard procedures. The three common  
21 chronic diseases were defined as (1) diabetes mellitus (FBG  $\geq 126$  mg/dL, or if ever  
22 diagnosed by a doctor); (2) hypertension (systolic/diastolic BP  $\geq 140/90$  mmHg, or if  
23 ever diagnosed by a doctor); and (3) hyperlipidemia (LDL  $\geq 160$  mg/dL, TC  $\geq 240$   
24 mg/dL, TG  $\geq 200$  mg/dL, or if ever diagnosed by a doctor). Third, disability  
25 classification and capability of activity of daily living (ADL). Primary disabilities,

1 such as physical, hearing, vision, or intellectual disabilities, were identified and  
2 confirmed by the certificates issued by the Taiwan government<sup>26</sup> prior to the  
3 interviews. ADL capability, judged using the Barthel ADL Index of feeding,  
4 grooming, bathing, mobility, toilet use, transfer, etc., reflected the dependence level of  
5 participants who required external assistance to complete these activities.  
6 “Independent” was coded if external assistance was unnecessary, or “dependent” if it  
7 was needed.

### 8 **Procedures and ethical considerations**

9 This study was approved by the relevant institutional review board of Chang  
10 Gung Memorial Hospital (IRB 102-3331B), and all procedures complied with the  
11 ethical guidelines. Participants were invited to participate in the study via letters sent  
12 by the public health nurses, and were fully informed about the purposes of the study.  
13 The letter emphasized the confidentiality of all collected data. Written consent forms  
14 were appropriately explained to and signed by participants and/or their guardians  
15 before arranging free medical evaluations. These evaluations, including blood  
16 sampling and physical check-ups, were conducted by the local hospital staff on a  
17 weekend, in a school auditorium, followed by individual interviews. To create a  
18 caring and friendly environment, each participant was accompanied by a community  
19 volunteer during the health screenings. If a participant was not an effective responder,  
20 a familiar caregiver, who was normally a family member(s) with whom they were  
21 living, was allowed to represent the participant in answering the questions.

22 The NRT was calculated carefully by research assistants who were trained by a  
23 research team that including the investigators and a dentist. Details of the interviews  
24 and measurement procedures have been reported in our previous study.<sup>10</sup> Face and  
25 content validity of the instrument were judged to be good (0.88–0.91) by a panel of

1 five experts: a faculty member in public health and health education, a dentist, a social  
2 worker in a disabled institution, and two nursing faculty members who specialize in  
3 the field of long-term care.

#### 4 **Statistical analyses**

5 Quantitative data were analyzed using SPSS v. 22.0 software. Descriptive  
6 statistical data are presented as numbers and percentages for categorical variables, and  
7 as means  $\pm$  standard deviations for continuous variables. Chi-square tests for  
8 categorical variables, as univariate analyses, were performed to compare those in the  
9 edentulous (NRT = 0), less-dentate (NRT = 1-19), and more-dentate (NRT  $\geq$  20)  
10 groups in terms of their background information and oral health behaviors. Stepwise  
11 logistic regression analyses, for identifying the modifiable factors associated with  
12 having fewer teeth (NRT < 20), were conducted in three models. The first model,  
13 model 1, a crude model without adjustment, was used to examine the associations  
14 between exposures and NRT < 20. The second, model 2, was partially adjusted, for  
15 three irreversible confounding factors, including age, gender, and education. The third,  
16 model 3, was fully adjusted for all exposures in the current study. For models 2 and 3,  
17 multivariable logistic regression analysis with a forward variable entry method (entry  
18 criteria: p-value < 0.05 in univariate analysis) was implemented. The odds ratio (OR)  
19 with 95% confidence interval (CI) and corresponding p-value were obtained by  
20 logistic regression model. All statistical assessments adopted two-tailed tests, and the  
21 p-value cut-off point for statistical significance was set as 0.05.

#### 22 **RESULTS**

23 Of the 603 individuals invited to participate in the study, 549 participants were  
24 enrolled in this analysis, but 18 failed to complete the NRT measurement. The  
25 response rate was therefore 91%. The majority of the participants were male (54.3%),

1 aged 20–80 years (mean age  $58.8 \pm 13.9$ ), and were not well-educated (educational  
2 attainment  $\leq 9$  years: 67.4%). The distribution of disabilities by type was: physical  
3 (55.9%), intellectual (19.7%), hearing (15.7%), and vision (8.7%). Most participants  
4 (88.7%) did not require assistance in the activities of daily living (ADL), as they only  
5 had a mild degree of disability. In addition, the prevalence rates of hypertension,  
6 hyperlipidemia, and diabetes mellitus were 56.5%, 49.9%, and 23.9%, respectively.  
7 Moreover, chi-square tests results indicated that participants who were of older age,  
8 had lower education, and had histories of hypertension and/or diabetes had  
9 significantly greater likelihoods of having fewer teeth and/or edentulous (Table 1).

10 As shown in Table 2, the participants had fewer teeth (mean NRT  $18.1 \pm 10.9$ ;  
11 median 21.0; NRT  $< 20$ : 44.8%; NRT = 0: 13.7%), and had poor oral hygiene (seldom  
12 dental floss: 83.4%; irregular dental visit: 78.0%; seldom brushed teeth after meal:  
13 77.4%; daily teeth brushing:  $1.8 \pm 0.9$  times). They also had other unfavorable  
14 behaviors (insufficient water intake/unbalanced nutrition: 40.3%; smoking: 25.3%;  
15 drinking alcohol: 16.2%). Chi-square test results showed that participants with the  
16 characteristics of rare dental floss use, irregular dentist visits, or unbalanced nutrition,  
17 had a significantly higher prevalence of having fewer and/or no teeth.

18 Regarding Table 3, after adjusting for all exposures (in model 3), the intellectual  
19 disability group had a significantly higher possibility of an NRT  $< 20$  than the  
20 physical disability group (OR: 2.20, 95% CI: 1.26–3.84), while the risk of an NRT  $<$   
21 20 in the other two subgroups were not increased. From the results of three models,  
22 i.e., model 1, model 2, and model 3, the demographic variables seemed to confound  
23 an NRT  $< 20$  associated with disability classifications. The other modifiable factors  
24 associated with an NRT  $< 20$  were the rare use of dental floss (OR: 2.12–2.64) and a  
25 history of hypertension (OR: 1.61–2.32).

1  
2  
3  
4  
5  
6  
7  
8  
9  
10  
11  
12  
13  
14  
15  
16  
17  
18  
19  
20  
21  
22  
23  
24  
25  
26  
27  
28  
29  
30  
31  
32  
33  
34  
35  
36  
37  
38  
39  
40  
41  
42  
43  
44  
45  
46  
47  
48  
49  
50  
51  
52  
53  
54  
55  
56  
57  
58  
59  
60

1

For peer review only

1  
2  
3  
4  
5  
6  
7  
8  
9  
10  
11  
12  
13  
14  
15  
16  
17  
18  
19  
20  
21  
22  
23  
24  
25  
26  
27  
28  
29  
30  
31  
32  
33  
34  
35  
36  
37  
38  
39  
40  
41  
42  
43  
44  
45  
46  
47  
48  
49  
50  
51  
52  
53  
54  
55  
56  
57  
58  
59  
60

1  
2 Table 1. Background information of the subjects, according to dentition status

| Variables                      | Dentate <sup>†</sup> |                      | Edentulous <sup>†</sup> | Total<br>(n=549) |
|--------------------------------|----------------------|----------------------|-------------------------|------------------|
|                                | NRT: ≥20<br>(n=293)  | NRT: 1-19<br>(n=165) | NRT: 0<br>(n=73)        |                  |
| Age (years)*                   | 53.8±13.3            | 63.1±12.4            | 69.5±8.1                | 58.8±13.9        |
| <65                            | 228 (77.8)           | 81 (49.1)            | 13 (17.8)               | 331 (60.3)       |
| ≥65                            | 65 (22.2)            | 84 (50.9)            | 60 (82.2)               | 218 (39.7)       |
| Gender                         |                      |                      |                         |                  |
| Female                         | 123 (42.0)           | 83 (50.3)            | 38 (52.1)               | 251 (45.7)       |
| Male                           | 170 (58.0)           | 82 (49.7)            | 35 (47.9)               | 298 (54.3)       |
| Educational attainment*        |                      |                      |                         |                  |
| >9 years                       | 132 (45.1)           | 37 (22.4)            | 6 ( 8.2)                | 179 (32.6)       |
| ≤9 years                       | 161 (54.9)           | 128 (77.6)           | 67 (91.8)               | 370 (67.4)       |
| Hypertension*                  |                      |                      |                         |                  |
| No                             | 154 (52.6)           | 54 (32.7)            | 23 (31.5)               | 239 (43.5)       |
| Yes                            | 139 (47.4)           | 111 (67.3)           | 50 (68.5)               | 310 (56.5)       |
| Diabetes mellitus*             |                      |                      |                         |                  |
| No                             | 235 (80.2)           | 121 (73.3)           | 47 (64.4)               | 418 (76.1)       |
| Yes                            | 58 (19.8)            | 44 (26.7)            | 26 (35.6)               | 131 (23.9)       |
| Hyperlipidemia                 |                      |                      |                         |                  |
| No                             | 138 (47.1)           | 88 (53.3)            | 37 (50.7)               | 275 (50.1)       |
| Yes                            | 155 (52.9)           | 77 (46.7)            | 36 (49.3)               | 274 (49.9)       |
| Disability classification      |                      |                      |                         |                  |
| Physical disability            | 166 (56.7)           | 93 (56.4)            | 38 (52.1)               | 307 (55.9)       |
| Intellectual disability        | 64 (21.8)            | 32 (19.4)            | 8 (11.0)                | 108 (19.7)       |
| Hearing impairment             | 44 (15.0)            | 22 (13.3)            | 17 (23.3)               | 86 (15.7)        |
| Vision impairment              | 19 ( 6.2)            | 18 (10.9)            | 10 (13.7)               | 48 ( 8.7)        |
| Capability of ADL <sup>†</sup> |                      |                      |                         |                  |
| Independent                    | 263 (89.8)           | 148 (89.7)           | 32 (84.9)               | 486 (88.7)       |
| Dependent                      | 30 (10.2)            | 17 (10.3)            | 11 (15.1)               | 62 (11.3)        |

3 Data are expressed as number (percentages) or Mean ± SD. NRT, number of remaining teeth; ADL,  
4 activities of daily living. \* p < 0.05 derived from  $\chi^2$  tests. <sup>†</sup>Missing data: 1 in ADL, 18 in NRT.

1 Table 2. Number of remaining teeth and oral health behaviors according to dentition status

| Variables <sup>#</sup>            | Dentate <sup>†</sup> |                      | Edentulous <sup>†</sup> | Total<br>(n = 549) |
|-----------------------------------|----------------------|----------------------|-------------------------|--------------------|
|                                   | NRT: ≥20<br>(n=293)  | NRT: 1-19<br>(n=165) | NRT: 0<br>(n=73)        |                    |
| Group of NRT (n=531) <sup>†</sup> | 26.7 ±3.7(27.0)      | 10.8±5.5 (12.0)      | -                       | 18.1 ± 10.9 (21.0) |
| 0                                 |                      |                      |                         | 73 (13.7)          |
| 1-19                              |                      |                      |                         | 165 (31.1)         |
| ≥20                               |                      |                      |                         | 293 (55.2)         |
| Oral hygiene                      |                      |                      |                         |                    |
| Times of daily brushing teeth     |                      |                      |                         | 1.8 ± 0.9          |
| Frequent (≥ 2 times)              | 204 (69.5)           | 116 (70.3)           | 44 (60.3)               | 372 (67.8)         |
| Infrequent (< 2 times)            | 89 (30.4)            | 49 (29.7)            | 29 (39.7)               | 177 (32.2)         |
| Brushing teeth after meal         |                      |                      |                         |                    |
| Often                             | 62 (21.2)            | 37 (22.4)            | 22 (30.1)               | 124 (22.6)         |
| Seldom                            | 231 (78.8)           | 128 (77.6)           | 51 (69.9)               | 425 (77.4)         |
| Using dental floss*               |                      |                      |                         |                    |
| Often (≥ once a day)              | 67 (22.9)            | 17 (10.3)            | 7 (9.6)                 | 91 (16.6)          |
| Seldom (< once a day)             | 226 (77.1)           | 148 (89.7)           | 66 (90.4)               | 458 (83.4)         |
| Visiting dentist per 6 months*    |                      |                      |                         |                    |
| Regular                           | 73 (24.9)            | 38 (23.0)            | 7 (9.6)                 | 121 (22.0)         |
| Irregular                         | 220 (75.1)           | 127 (77.0)           | 66 (90.4)               | 428 (78.0)         |
| Water intake per day              |                      |                      |                         |                    |
| Sufficient (≥ 1500 ml)            | 186 (63.5)           | 98 (59.4)            | 35 (47.9)               | 328 (59.7)         |
| Insufficient (< 1500 ml)          | 107 (36.5)           | 67 (40.6)            | 38 (52.1)               | 221 (40.3)         |
| Five nutrition groups per day*    |                      |                      |                         |                    |
| Balanced                          | 191 (65.2)           | 84 (50.9)            | 47 (64.4)               | 328 (59.7)         |
| Unbalanced                        | 102 (34.8)           | 81 (49.1)            | 26 (35.6)               | 221 (40.3)         |
| Smoking habit                     |                      |                      |                         |                    |
| Never or formerly                 | 218 (74.4)           | 126 (76.4)           | 53 (72.6)               | 410 (74.7)         |
| Current users                     | 75 (25.6)            | 39 (23.6)            | 20 (27.4)               | 139 (25.3)         |
| Alcohol habit                     |                      |                      |                         |                    |
| Never or formerly                 | 245 (83.6)           | 139 (84.2)           | 63 (86.3)               | 460 (83.8)         |
| Current users                     | 48 (15.4)            | 26 (15.8)            | 10 (13.7)               | 89 (16.2)          |

2 Data are expressed as number (percentages) or Mean ± SD (median). NRT, number of remaining teeth.

3 <sup>#</sup> All variables except NRT asked the edentulous subjects to recall their behaviors when dentate.4 \* p < 0.05 derived from  $\chi^2$  tests. <sup>†</sup>18 missing data.

5



1 Table 3. Odds ratios (95% CI) of the factors associated with NRT < 20 (n = 531<sup>†</sup>)

| Variables/ Values                  | Model 1           | Model 2           | Model 3           |
|------------------------------------|-------------------|-------------------|-------------------|
|                                    | OR (95% CI)       | OR (95% CI)       | OR (95% CI)       |
| Age (years)                        | 1.08 (1.06-1.09)* | 1.07 (1.05-1.08)* | 1.07 (1.05-1.10)* |
| Gender                             |                   |                   |                   |
| Female <sup>¶</sup>                |                   |                   |                   |
| Male                               | 0.70 (0.50-0.99)* | §                 | §                 |
| Educational attainment             |                   |                   |                   |
| > 9 years <sup>¶</sup>             |                   |                   |                   |
| ≤ 9 years                          | 3.72 (2.49-5.56)* | 2.01 (1.28-3.14)* | 1.96 (1.23-3.10)* |
| Hypertension                       |                   |                   |                   |
| No <sup>¶</sup>                    | -                 | -                 | -                 |
| Yes                                | 2.28 (1.53-3.31)* | 1.61 (1.09-2.39)* | 1.73 (1.15-2.60)* |
| Diabetes mellitus                  |                   |                   |                   |
| No <sup>¶</sup>                    | -                 | -                 | -                 |
| Yes                                | 1.69 (1.13-2.52)* | §                 | §                 |
| Hyperlipidemia                     |                   |                   |                   |
| No <sup>¶</sup>                    | -                 | -                 | -                 |
| Yes                                | 0.81 (0.57-1.13)  | §                 | §                 |
| Disability classification          |                   |                   |                   |
| Physical disability <sup>¶</sup>   | -                 | -                 | -                 |
| Intellectual disability            | 0.79 (0.50-1.25)  | 2.20 (1.26-3.84)* | 2.30 (1.30-4.08)* |
| Hearing impairment                 | 1.12 (0.69-1.83)  | 0.76 (0.44-1.32)  | 0.75 (0.43-1.32)  |
| Vision impairment                  | 1.87 (0.99-3.49)  | 1.54 (0.75-3.13)  | 1.48 (0.72-3.04)  |
| Capability of ADL                  |                   |                   |                   |
| Independent <sup>¶</sup>           | -                 | -                 | -                 |
| Dependent                          | 1.17 (0.68-2.02)  | §                 | §                 |
| Oral health behaviors <sup>#</sup> |                   |                   |                   |
| Daily brushing teeth               |                   |                   |                   |
| Frequent <sup>¶</sup>              | -                 | -                 | -                 |
| Infrequent                         | 1.12 (0.77-1.61)  | §                 | §                 |
| Using dental floss                 |                   |                   |                   |
| Often <sup>¶</sup>                 | -                 | -                 | -                 |
| Seldom                             | 2.64 (1.60-4.37)* | 2.22 (1.28-3.83)* | 2.12 (1.21-3.71)* |
| Visiting dentist                   |                   |                   |                   |
| Regular <sup>¶</sup>               | -                 | -                 | -                 |
| Irregular                          | 1.42 (0.94-2.16)  | §                 | §                 |

|                                |                   |                  |   |   |
|--------------------------------|-------------------|------------------|---|---|
| Water intake                   |                   |                  |   |   |
| Sufficient <sup>†</sup>        | -                 | -                | - | - |
| Insufficient                   | 1.37 (0.97-1.95)  | §                |   | § |
| Five nutrition groups per day  |                   |                  |   |   |
| Balanced <sup>†</sup>          | -                 | -                | - | - |
| Unbalanced                     | 1.53 (1.08-2.17)* | 1.58(1.07-2.34)* |   | § |
| Smoking habit                  |                   |                  |   |   |
| Never or formerly <sup>†</sup> | -                 | -                | - | - |
| Current users                  | 0.96 (0.65-1.42)  | §                |   | § |
| Alcohol habit                  |                   |                  |   |   |
| Never or formerly <sup>†</sup> | -                 | -                | - | - |
| Current users                  | 0.91 (0.57-1.46)  | §                |   | § |

1 NRT, number of remaining teeth; ADL, activities of daily living; OR, odds ratio; CI, confidence  
 2 interval. Model 1: crude; model 2: adjusted for age, gender, and education; model 3: model 2 + all  
 3 variables in Table 3. <sup>†</sup>18 missing data. \* p value <0.05. # Variables reflects edentulous subjects' recall of  
 4 their behaviors when dentate. §: Variables were not selected into the model. <sup>†</sup>Reference group.  
 5

## 1 DISCUSSION

2 This study featured a nurse-led health program aimed at promoting the oral  
3 health of disabled individuals. Four key findings emerged: first, fewer teeth were  
4 counted and there was a higher prevalence of an NRT < 20 and edentulism in the  
5 present study population than in those reported in the existing literature. According to  
6 previous research, the average NRT for non-disabled people is approximately 25,<sup>10</sup>  
7 and only 16% of these individuals have an NRT < 20.<sup>2,10</sup> However, in this study, the  
8 average NRT in disabled individuals was 18.1, and 44.8% had an NRT < 20, which  
9 indicated a significantly worse oral health condition. Even when ruling out the  
10 edentulous, the average NRT was 20.9 and prevalence of NRT < 20 was 36.0%  
11 among the dentate subgroup. The slight changes in the statistics from 18.1 to 20.9 and  
12 44.8% to 36.0%, do not indicate a change in the trend. The literature supports the  
13 view that adults with disabilities commonly exhibit poor oral hygiene and have a  
14 lower NRT than non-disabled people, owing to their limited capabilities, in terms of  
15 cognitive comprehension, body coordination, or muscle power.<sup>11, 19</sup> In fact, the  
16 prevalence of an NRT < 20 in this study was not only higher than the figures  
17 previously reported for non-disabled people, but was also higher than that reported in  
18 a Belgian study of people with disabilities (33%).<sup>2</sup> Moreover, the edentulous rate of  
19 13.7% found in this study was also higher than the edentulous rate of 8.9% reported  
20 by a study conducted in the USA.<sup>16</sup>

21 Second, most disabled participants reported having inadequate oral hygiene  
22 behaviors in general. These behaviors, including seldom using dental floss, irregular  
23 dental visits and scaling, and rarely brushing teeth after meals, were factors associated  
24 with tooth loss in previous reports,<sup>1, 7-8</sup> and may also affect other systemic diseases.<sup>5</sup>  
25 The prevalence of these behaviors in this study was 83.4%, 78.0%, and 77.4%,

1  
2  
3  
4  
5  
6  
7  
8  
9  
10  
11  
12  
13  
14  
15  
16  
17  
18  
19  
20  
21  
22  
23  
24  
25  
26  
27  
28  
29  
30  
31  
32  
33  
34  
35  
36  
37  
38  
39  
40  
41  
42  
43  
44  
45  
46  
47  
48  
49  
50  
51  
52  
53  
54  
55  
56  
57  
58  
59  
60

1 respectively, which was much higher than in the non-disabled population (about  
2 28–70%);<sup>7, 10, 15-17</sup> and were also greater than those in disabled individuals in other  
3 countries (29–51%).<sup>16, 24</sup> Particularly, those who were edentulous had worse oral  
4 hygiene behaviors than those who were dentate. Although irregular dental visits were  
5 not a significant factor for an NRT < 20 in the current study, most previous studies  
6 indicated the importance of regular dental care.<sup>1-2, 31-32</sup> To encourage regular dental  
7 care, the Taiwanese government has provided incentives under the NHI system, by  
8 requiring only payment of a registration and copayment fee, for use of oral health  
9 services by the disabled.<sup>28</sup> However, individuals with disabilities typically do not visit  
10 dentists until their dental problems become too serious to be treated, and tooth  
11 extraction is often unavoidable. The issue of regular dental visits to help maintain a  
12 greater number of teeth in the disabled should be explored in future.

13  
14  
15  
16  
17  
18  
19  
20  
21  
22  
23  
24  
25

13 Third, adults with intellectual disability have an increased possibility of having an  
14 NRT < 20. In this study, the extreme case, i.e., edentulous, showed a prevalence of  
15 7.7% among those with intellectual disability, which was lower than that reported in  
16 the USA (10.9%).<sup>22</sup> In comparison with those with physical disability, the subgroup of  
17 individuals with intellectual disabilities had a higher likelihood of having fewer teeth,  
18 which is consistent with the findings of previous studies.<sup>2,9,18,22</sup> Lindsay<sup>33</sup> attributes  
19 this phenomenon to their preferences for eating desserts, sweets, and drinking soft  
20 drinks; similarly, their reduced capacity for self-control owing to their cognitive  
21 impairments could also modulate this effect. These individuals often are not fully  
22 capable of independent self-care, and their caregivers may find it difficult to perform  
23 oral hygiene activities for them over the long term. In addition, adults with  
24 developmental disabilities often appear to have disorders, such as gastro-esophageal  
25 reflux disease, excessive salivation, and induced xerostomia triggered by antiepileptic

1 medications, which could increase the possibility of poor oral health.

2 Fourth, the use of dental floss is a modifiable factor associated with the NRT.  
3 Except for intellectual disabilities, other associated factors, such as the rare use of  
4 dental floss and hypertension<sup>1, 10, 13</sup> are similar to the factors associated with NRT in  
5 non-disabled individuals. Among these, dental floss use is the most malleable  
6 component that can be addressed by instruction from public health practitioners. This  
7 study found that most disabled adults (77.4%) lacked the habit of cleaning teeth after  
8 meals, and brushed their teeth less often than twice a day. The practice of dental  
9 flossing may be a complementary oral hygiene step that can help to maintain the NRT.  
10 A previous systematic review has confirmed that brushing and flossing can  
11 significantly reduce plaque and gingivitis as compared with tooth brushing alone.<sup>14</sup>

12 It is the presence of dental plaque and food debris in the crevices between the  
13 teeth that encourage bacteria to flourish, activating the inflammatory response and the  
14 innate immune system in the human body. These bacteria induce swelling and  
15 bleeding of the gums, the destruction of periodontal tissues and alveolar bones, and  
16 the promotion of tooth mobility; thus, ultimately causing tooth loss.<sup>34-35</sup> The findings  
17 from some systematic reviews suggest that oral hygiene methods, such as tooth  
18 brushing, dental flossing, and/or interdental brushing are all effective means of  
19 eliminating the periodontal pathogens thriving in the buccal cavity<sup>14, 36</sup> and even in the  
20 blood.<sup>37</sup>

21 However, people with disabilities may have difficulties flossing, due to  
22 disability-related issues with self-control, movement coordination, comprehension,  
23 etc., although nearly 90% of them in this study were categorized as having basic  
24 self-care ability in terms of ADL. Adopting a habit of dental flossing, and accuracy  
25 and thoroughness of dental cleaning processes, may even be demanding for some

1 non-disabled people, as well as for adults with disabilities. The assistance of  
2 interdental brushing, which is recognized as an easier and more effective method for  
3 reducing periodontal pathogens,<sup>36</sup> can also be considered as an alternative approach.

4 To address the problem of NRT < 20, oral hygiene instruction, a commonly used  
5 clinical technique, is imperative for improving oral hygiene. Since disabled adults  
6 may not cope with regular dental visits and examinations, integration of preventive  
7 and corrective oral health in their lives is highly beneficial.<sup>31</sup> Routine daily teeth  
8 cleaning is undoubtedly the most economic and convenient approach to ensure oral  
9 health. It can also reduce the fear of individuals with disabilities about accessing oral  
10 health services, and even shorten the scaling time required.<sup>38</sup> Unfortunately, previous  
11 studies have demonstrated that community-dwelling individuals with disabilities have  
12 worse oral health than those living in institutions.<sup>22, 39</sup> Since these participants were  
13 living at home with relatives, their families were generally more concerned with  
14 physiological diseases than with oral conditions, and were not aware of the  
15 importance of oral hygiene. Teeth cleaning was also typically perceived as the  
16 individuals' own responsibility, as these disabled people generally seemed to be  
17 capable of managing the task. However, they had a higher prevalence of an NRT < 20,  
18 which may imply that even if the participants had basic self-care ability, it does not  
19 mean that they are capable of achieving good quality oral hygiene. Their families  
20 sometimes opted to ignore these "trivial" matters, as they were already exhausted by  
21 the burden of care. Consequently, without professional guidance and tracking, daily  
22 cleaning of the teeth becomes a difficult task for community-based people with  
23 disabilities. A systematic review has concluded that additional oral hygiene instruction  
24 could help cultivate a higher quality of oral health behaviors; thus, ameliorating  
25 gingivitis and eradicating dental plaque.<sup>32</sup>

1 As many researchers claim that good oral health can improve almost every  
2 aspect of life, from overall health to self-esteem, communication, nutrition, quality of  
3 life, savings in medical expenses, and finding employment, for people with  
4 disabilities, in addition to relieving the burden on their care givers.<sup>17, 40</sup> To achieve the  
5 oral health goal of 8020,<sup>3</sup> more resources and attention should be invested to provide  
6 good oral care, matched to the individual's disability characteristics. Further  
7 integration of the social welfare networks, oral hygiene instructions, and coordination  
8 of medical professionals and caregivers for adults with disabilities are recommended.

### 9 **Limitations**

10 This study has some limitations. First, the participants' oral conditions were  
11 examined by research assistants, rather than by qualified dentists, due to constraints  
12 on the participants' cooperation and expectations. Only superficial features, such as  
13 the remaining number of natural and filled teeth were investigated; other thorough  
14 evaluations, such as those of caries and periodontal tissues, were not performed. Thus,  
15 potential oral problems may have been ignored or underestimated by the NRT figures  
16 reported here. Second, some selection bias may have been involved as the criteria for  
17 inclusion included the ability to travel from home to the nearby school where the  
18 examinations were conducted. The participants were mostly categorized as having  
19 mild disabilities, with limited variation. Their oral health conditions should thus be  
20 presumed to be generally better than those of individuals with more severe  
21 disabilities,<sup>27</sup> who were not included in this survey. The real situation of oral health  
22 for adults with disabilities may thus be even worse than that indicated by this study.  
23 Third, the self-reporting health behaviors questionnaire might trigger socially desired  
24 behaviors from participants implicitly directed by the research and/or researchers.  
25 Fourth, the participants were conveniently recruited from one location, rather than by

1 nationwide cluster sampling. The generalizability of the study results may therefore  
2 be limited. Finally, the cross-sectional study design has an inherent limitation in terms  
3 of investigating the causal inferences between variables. As it is a snapshot of a  
4 specific moment, the cross-sectional design did not track variables over a period of  
5 time to gain insight into the process. To address this limitation, we asked participants  
6 to recall their oral health behavior over the past year and/or when they were dentate.  
7 However, the recall process might generate another bias due to poor memory recall.

## 8 **CONCLUSION**

9 For community-dwelling individuals with disabilities, the prevalence of an NRT  
10 < 20 and edentulism were significantly greater than that reported in previous studies.  
11 Poor oral hygiene behaviors were identified as being a general characteristic of the  
12 participants. Adults with intellectual disability had a greater likelihood of tooth loss.  
13 The other two modifiable factors strongly associated with an NRT < 20 were the habit  
14 of seldom using dental floss and hypertension. As oral hygiene instructions are the  
15 least expensive and easiest way of integrating preventative intervention options for  
16 chronic diseases into daily activities, professionals should concentrate on this  
17 approach for individuals with disabilities and attempt to enhance their teeth cleaning  
18 awareness and capabilities. Finally, to satisfy the oral health needs of  
19 community-dwelling adults with disabilities, issues such as the risk factors associated  
20 with different types of disabilities, regular dental visits, and their special needs can be  
21 further explored.

## 22 **Conflict of interest**

23 The authors declare that they have no competing interests.

## 24 **Authors' contributions**

25 MYP and TCH: designing the study, collecting and analyzing data, and drafting the



1 paper. HCT and YCL: proofreading and revising the manuscripts. MYC: initializing,  
2 conceptualizing, and supervising the research process. All authors have read and  
3 approved the final manuscript.

#### 4 **Acknowledgments**

5 We thank all participants in this study and staff at the Chiayi Bureau of Health  
6 Promotion for their support, which made this study possible.

#### 7 **Funding**

8 The study was supported by a grant from Chang Gung Memorial Hospital (BMRP  
9 148).

#### 10 **Patient consent**

11 Obtained

#### 12 **Ethics approval**

13 This study was approved by the institutional review board of the ethical committee of  
14 Chang Gung Memorial Hospital (IRB 102-3331B)

15 **Data sharing statement** No additional data are available.

16

## References

1. Wang TF, Chen YY, Liou YM, et al. Investigating tooth loss and associated factors among older Taiwanese adults. *Arch Gerontol Geriatr* 2014;58(3):446-53.
2. Leroy R, Declerck D. Objective and subjective oral health care needs among adults with various disabilities. *Clin Oral Investig* 2013;17(8):1869-78.
3. Yamanaka K, Nakagaki H, Morita I, et al. Comparison of the health condition between the 8020 achievers and the 8020 non-achievers. *Int Dent J* 2008;58(3):146-50.
4. Marcenes W, Kassebaum NJ, Bernabe E, et al. Global burden of oral conditions in 1990-2010: a systematic analysis. *J Dent Res* 2013;92(7):592-7.
5. Linden GJ, Lyons A, Scannapieco FA. periodontal systemic associations: review of the evidence. *J Clin Periodontol* 2013;40(Suppl. 14):S8-S19.
6. Hayasaka K, Tomata Y, Aida J, et al. Tooth Loss and Mortality in Elderly Japanese Adults: Effect of Oral Care. *J Am Geriatr Soc* 2013;61(5):815-20.
7. Huang J-C, Peng Y-S, Fan J-Y, et al. Factors associated with numbers of remaining teeth among type 2 diabetes: a cross-sectional study. *J Clin Nurs* 2013;22(13-14):1926-32.
8. Hsu K-J, Yen Y-Y, Lan S-J, et al. Impact of oral health behaviours and oral habits on the number of remaining teeth in older Taiwanese dentate adults. *Oral Health Prev Dent* 2013;11(2):121-30.
9. Mac Giolla Phadraig C, McCallion P, Cleary E, et al. Total tooth loss and complete denture use in older adults with intellectual disabilities in Ireland. *J Public Health Dent* 2015;75(2):101-8.
10. Tsai SJ, Lin MS, Chiu WN, et al. Factors associated with having less than 20 natural teeth in rural adults: a cross-sectional study. *BMC Oral Health* 2015;15:158.
11. Jiang Y, Okoro CA, Oh J, et al. Sociodemographic and health-related risk factors associated with tooth loss among adults in Rhode Island. *Prev Chronic Dis* 2013;10:E45.
12. Bachkati K, Mortensen E, Brønnum-Hansen H, et al. Poor Oral Health in Late Life: Selected Predictors and Initiatives Towards Prevention of Tooth Loss. *J Gerontol Geriatr Res* 2017;6(2):398.
13. Yoshino K, Ito K, Kuroda M, et al. Tooth Loss in Problem-oriented, Irregular, and Regular Attenders at Dental Offices. *Bull Tokyo Dent Coll* 2016;57(1):11-9.
14. Sambunjak D, Nickerson Jason W, Poklepovic T, et al. Flossing for the management of periodontal diseases and dental caries in adults. *Cochrane Database Syst Rev* 2011(12):CD008829.

- 1  
2  
3  
4  
5 15. Islas-Granillo H, Borges-Yanez A, Medina-Solis CE, et al. Tooth-Loss  
6 Experience and Associated Variables among Adult Mexicans 60 Years and  
7 Older. *P R Health Sci J* 2016;35(2):88-92.  
8  
9 16. Armour BS, Swanson M, Waldman HB, et al. A profile of state-level differences  
10 in the oral health of people with and without disabilities, in the U.S., in 2004.  
11 *Public health reports* 2008;123(1):67-75.  
12  
13 17. Hall JP, Chapman SL, Kurth NK. Poor oral health as an obstacle to employment  
14 for Medicaid beneficiaries with disabilities. *J Public Health Dent*  
15 2013;73(1):79-82.  
16  
17 18. Oliveira JS, Prado Júnior RR, de Sousa Lima KR, et al. Intellectual disability and  
18 impact on oral health: a paired study. *Spec Care Dentist* 2013;33(6):262-8.  
19  
20 19. Ameer N, Palaparathi R, Neerudu M, et al. Oral hygiene and periodontal status of  
21 teenagers with special needs in the district of Nalgonda, India. *J Indian Soc*  
22 *Periodontol* 2012;16(3):421-5.  
23  
24 20. Cumella S, Ransford N, Lyons J, et al. Needs for oral care among people with  
25 intellectual disability not in contact with Community Dental Services. *J Intellect*  
26 *Disabil Res* 2000;44(1):45-52.  
27  
28 21. Anders PL, Davis EL. Oral health of patients with intellectual disabilities: a  
29 systematic review. *Spec Care Dentist* 2010;30(3):110-7.  
30  
31 22. Morgan JP, Minihan PM, Stark PC, et al. The oral health status of 4,732 adults  
32 with intellectual and developmental disabilities. *J Am Dent Assoc*  
33 2012;143(8):838-46.  
34  
35 23. Turner S, Sweeney M, Kennedy C, et al. The oral health of people with  
36 intellectual disability participating in the UK Special Olympics. *J Intellect*  
37 *Disabil Res* 2008;52(1):29-36.  
38  
39 24. Havercamp SM, Scott HM. National health surveillance of adults with disabilities,  
40 adults with intellectual and developmental disabilities, and adults with no  
41 disabilities. *Disabil Health J* 2015;8(2):165-72.  
42  
43 25. World Health Organization (WHO). *Disabilities*  
44 <http://www.who.int/topics/disabilities/en/>. (accessed 28 December 2016)  
45  
46 26. Ministry of Health and Welfare, Taiwan. *Statistics of General Health and*  
47 *Welfare*. [http://www.mohw.gov.tw/EN/Ministry/Statistic.aspx?f\\_list\\_no=474](http://www.mohw.gov.tw/EN/Ministry/Statistic.aspx?f_list_no=474).  
48 (accessed 28 January 2017)  
49  
50 27. Lai H-T, Kung P-T, Su H-P, et al. Examining related influential factors for dental  
51 calculus scaling utilization among people with disabilities in Taiwan, a  
52 nationwide population-based study. *Res Dev Disabil* 2014;35(9):2231-40.  
53  
54 28. National Health Insurance Administration (NHI), Taiwan. *Medical services*,  
55  
56  
57  
58  
59  
60

- 1  
2  
3  
4  
5 1 *assistances & cares.*  
6 2 [http://www.nhi.gov.tw/English/index.aspx?menu=8&menu\\_id=30&webdata\\_id=](http://www.nhi.gov.tw/English/index.aspx?menu=8&menu_id=30&webdata_id=0&WD_ID=30)  
7 3 [0&WD\\_ID=30](http://www.nhi.gov.tw/English/index.aspx?menu=8&menu_id=30&webdata_id=0&WD_ID=30). (accessed 5 April 2017)  
8  
9 4 29. Steele JG, Treasure E, Pitts NB, et al. Total tooth loss in the United Kingdom in  
10 5 1998 and implications for the future. *Br Dent J* 2000;189(11):598-603.  
11 6 30. Health Promotion Administration, Ministry of Health and Welfare. *Survey on the*  
12 7 *prevalence of hypertension, hyperglycemia and hyperlipidemia in Taiwan.*  
13 8 <http://www.hpa.gov.tw/BHPNet/Web/HealthTopic/Topic.aspx?id=20140929000>  
14 9 [1](http://www.hpa.gov.tw/BHPNet/Web/HealthTopic/Topic.aspx?id=20140929000). (accessed 28 January 2017)  
15  
16 10 31. Gabre P, Martinsson T, Gahnberg L. Longitudinal study of dental caries, tooth  
17 11 mortality and interproximal bone loss in adults with intellectual disability. *Eur J*  
18 12 *Oral Sci* 2001;109(1):20-6.  
19 13 32. Worthington Helen V, Clarkson Jan E, Bryan G, et al. Routine scale and polish for  
20 14 periodontal health in adults. *Cochrane Database Syst Rev* 2013(11):CD004625.  
21 15 33. Lindsay P. Care of the Adult with Intellectual Disability in Primary Care. London,  
22 16 UK: Radcliffe Pub. 2011.  
23 17 34. Di Benedetto A, Gigante I, Colucci S, et al. Periodontal disease: linking the  
24 18 primary inflammation to bone loss. *Clin Dev Immunol* 2013;2013(503754): 1-7.  
25 19 35. Graves DT, Li J, Cochran DL. Inflammation and uncoupling as mechanisms of  
26 20 periodontal bone loss. *J Dent Res* 2011;90(2):143-53.  
27 21 36. Poklepovic T, Worthington Helen V, Johnson Trevor M, et al. Interdental  
28 22 brushing for the prevention and control of periodontal diseases and dental caries  
29 23 in adults. *Cochrane Database Syst Rev* 2013(12):Cd009857.  
30 24 37. Marín M-J, Figuero E, González I. Comparison of the detection of periodontal  
31 25 pathogens in bacteraemia after tooth brushing by culture and molecular  
32 26 techniques. *Medicina oral, patologia oral y cirugia bucal* 2016;21(3):e276-84.  
33 27 38. Kim MJ, Noh H, Oh HY. Efficiency of professional tooth brushing before  
34 28 ultrasonic scaling. *Int J Dent Hyg* 2015;13(2):125-31.  
35 29 39. Bershadsky J, Kane RL. Place of residence affects routine dental care in the  
36 30 intellectually and developmentally disabled adult population on Medicaid. *Health*  
37 31 *Serv Res* 2010;45(5p1):1376-89.  
38 32 40. Elliott I, Nunn J, Sadlier D. Oral health & disability: the way forward Ireland:  
39 33 National Disability Authority; 2005  
40 34 <http://nda.ie/Image-Library/PDF-Downloads/PDF-Version-Oral-Health-The-Way>  
41 35 [-Forward-939-KB-.pdf](http://nda.ie/Image-Library/PDF-Downloads/PDF-Version-Oral-Health-The-Way). (accessed 10 August 2016)  
42  
43  
44  
45  
46  
47  
48  
49  
50  
51  
52  
53  
54  
55  
56  
57  
58  
59  
60

## STROBE Statement—checklist of items that should be included in reports of observational studies

|                              | Item No | Recommendation                                                                                                                                                                                                                                                                                                                                                                                                                                                                                                                                                                                                                                                                                   |
|------------------------------|---------|--------------------------------------------------------------------------------------------------------------------------------------------------------------------------------------------------------------------------------------------------------------------------------------------------------------------------------------------------------------------------------------------------------------------------------------------------------------------------------------------------------------------------------------------------------------------------------------------------------------------------------------------------------------------------------------------------|
| <b>Title and abstract</b>    | p1-3    | (a) Indicate the study's design with a commonly used term in the title or the abstract<br>(b) Provide in the abstract an informative and balanced summary of what was done and what was found                                                                                                                                                                                                                                                                                                                                                                                                                                                                                                    |
| <b>Introduction</b>          |         |                                                                                                                                                                                                                                                                                                                                                                                                                                                                                                                                                                                                                                                                                                  |
| Background/rationale         | P4-5    | Explain the scientific background and rationale for the investigation being reported                                                                                                                                                                                                                                                                                                                                                                                                                                                                                                                                                                                                             |
| Objectives                   | p5      | State specific objectives, including any prespecified hypotheses                                                                                                                                                                                                                                                                                                                                                                                                                                                                                                                                                                                                                                 |
| <b>Methods</b>               |         |                                                                                                                                                                                                                                                                                                                                                                                                                                                                                                                                                                                                                                                                                                  |
| Study design                 | P6      | Present key elements of study design early in the paper                                                                                                                                                                                                                                                                                                                                                                                                                                                                                                                                                                                                                                          |
| Setting                      | P6      | Describe the setting, locations, and relevant dates, including periods of recruitment, exposure, follow-up, and data collection                                                                                                                                                                                                                                                                                                                                                                                                                                                                                                                                                                  |
| Participants                 | P6      | (a) <i>Cohort study</i> —Give the eligibility criteria, and the sources and methods of selection of participants. Describe methods of follow-up<br><i>Case-control study</i> —Give the eligibility criteria, and the sources and methods of case ascertainment and control selection. Give the rationale for the choice of cases and controls<br><i>Cross-sectional study</i> —Give the eligibility criteria, and the sources and methods of selection of participants<br>(b) <i>Cohort study</i> —For matched studies, give matching criteria and number of exposed and unexposed<br><i>Case-control study</i> —For matched studies, give matching criteria and the number of controls per case |
| Variables                    | P6-8    | Clearly define all outcomes, exposures, predictors, potential confounders, and effect modifiers. Give diagnostic criteria, if applicable                                                                                                                                                                                                                                                                                                                                                                                                                                                                                                                                                         |
| Data sources/<br>measurement | P6-8    | For each variable of interest, give sources of data and details of methods of assessment (measurement). Describe comparability of assessment methods if there is more than one group                                                                                                                                                                                                                                                                                                                                                                                                                                                                                                             |
| Bias                         |         | Describe any efforts to address potential sources of bias                                                                                                                                                                                                                                                                                                                                                                                                                                                                                                                                                                                                                                        |
| Study size                   |         | Explain how the study size was arrived at                                                                                                                                                                                                                                                                                                                                                                                                                                                                                                                                                                                                                                                        |
| Quantitative variables       | P6-8    | Explain how quantitative variables were handled in the analyses. If applicable, describe which groupings were chosen and why                                                                                                                                                                                                                                                                                                                                                                                                                                                                                                                                                                     |
| Statistical methods          | P9-10   | (a) Describe all statistical methods, including those used to control for confounding<br>(b) Describe any methods used to examine subgroups and interactions<br>(c) Explain how missing data were addressed<br>(d) <i>Cohort study</i> —If applicable, explain how loss to follow-up was addressed<br><i>Case-control study</i> —If applicable, explain how matching of cases and controls was addressed<br><i>Cross-sectional study</i> —If applicable, describe analytical methods taking account of sampling strategy<br>(e) Describe any sensitivity analyses                                                                                                                                |

Continued on next page

**Results**

|                  |        |                                                                                                                                                                                                                                                                                                                                                                                                               |
|------------------|--------|---------------------------------------------------------------------------------------------------------------------------------------------------------------------------------------------------------------------------------------------------------------------------------------------------------------------------------------------------------------------------------------------------------------|
| Participants     | P10    | (a) Report numbers of individuals at each stage of study—eg numbers potentially eligible, examined for eligibility, confirmed eligible, included in the study, completing follow-up, and analysed<br>(b) Give reasons for non-participation at each stage<br>(c) Consider use of a flow diagram                                                                                                               |
| Descriptive data | P10–11 | (a) Give characteristics of study participants (eg demographic, clinical, social) and information on exposures and potential confounders<br>(b) Indicate number of participants with missing data for each variable of interest<br>(c) <i>Cohort study</i> —Summarise follow-up time (eg, average and total amount)                                                                                           |
| Outcome data     | P12–13 | <i>Cohort study</i> —Report numbers of outcome events or summary measures over time<br><i>Case-control study</i> —Report numbers in each exposure category, or summary measures of exposure<br><i>Cross-sectional study</i> —Report numbers of outcome events or summary measures                                                                                                                             |
| Main results     | p13–16 | (a) Give unadjusted estimates and, if applicable, confounder-adjusted estimates and their precision (eg, 95% confidence interval). Make clear which confounders were adjusted for and why they were included<br>(b) Report category boundaries when continuous variables were categorized<br>(c) If relevant, consider translating estimates of relative risk into absolute risk for a meaningful time period |
| Other analyses   |        | Report other analyses done—eg analyses of subgroups and interactions, and sensitivity analyses                                                                                                                                                                                                                                                                                                                |

**Discussion**

|                  |        |                                                                                                                                                                            |
|------------------|--------|----------------------------------------------------------------------------------------------------------------------------------------------------------------------------|
| Key results      | p16–20 | Summarise key results with reference to study objectives                                                                                                                   |
| Limitations      | P20    | Discuss limitations of the study, taking into account sources of potential bias or imprecision. Discuss both direction and magnitude of any potential bias                 |
| Interpretation   | p16–20 | Give a cautious overall interpretation of results considering objectives, limitations, multiplicity of analyses, results from similar studies, and other relevant evidence |
| Generalisability | P22    | Discuss the generalisability (external validity) of the study results                                                                                                      |

**Other information**

|         |     |                                                                                                                                                               |
|---------|-----|---------------------------------------------------------------------------------------------------------------------------------------------------------------|
| Funding | P22 | Give the source of funding and the role of the funders for the present study and, if applicable, for the original study on which the present article is based |
|---------|-----|---------------------------------------------------------------------------------------------------------------------------------------------------------------|

\*Give information separately for cases and controls in case-control studies and, if applicable, for exposed and unexposed groups in cohort and cross-sectional studies.

**Note:** An Explanation and Elaboration article discusses each checklist item and gives methodological background and published examples of transparent reporting. The STROBE checklist is best used in conjunction with this article (freely available on the Web sites of PLoS Medicine at <http://www.plosmedicine.org/>, Annals of Internal Medicine at <http://www.annals.org/>, and Epidemiology at <http://www.epidem.com/>). Information on the STROBE Initiative is available at [www.strobe-statement.org](http://www.strobe-statement.org).

# BMJ Open

## Prevalence of and factors associated with fewer than 20 remaining teeth in Taiwanese adults with disabilities: A community-based cross-sectional study

|                                 |                                                                                                                                                                                                                                                                                                                       |
|---------------------------------|-----------------------------------------------------------------------------------------------------------------------------------------------------------------------------------------------------------------------------------------------------------------------------------------------------------------------|
| Journal:                        | <i>BMJ Open</i>                                                                                                                                                                                                                                                                                                       |
| Manuscript ID                   | bmjopen-2017-016270.R3                                                                                                                                                                                                                                                                                                |
| Article Type:                   | Research                                                                                                                                                                                                                                                                                                              |
| Date Submitted by the Author:   | 25-Aug-2017                                                                                                                                                                                                                                                                                                           |
| Complete List of Authors:       | Pan, Mei-Yu ; Chang Gung University of Science and Technology - Chiayi Campus<br>Hsieh, Tsung-Cheng<br>Tai, Hung-Cheng<br>Lin, Ming-shyan; Chang Gung Memorial Hospital, Yunlin, Taiwan, Division of Cardiology<br>Lin, Yu-Chen<br>Chen, Mei-Yen; Chang Gung University of Science and Technology, Nursing Department |
| <b>Primary Subject Heading</b>: | Dentistry and oral medicine                                                                                                                                                                                                                                                                                           |
| Secondary Subject Heading:      | Nursing, Public health, Health services research                                                                                                                                                                                                                                                                      |
| Keywords:                       | Disabilities, number of remaining teeth, health promotion, oral hygiene                                                                                                                                                                                                                                               |
|                                 |                                                                                                                                                                                                                                                                                                                       |

SCHOLARONE™  
Manuscripts

Only

1  
2  
3  
4 **Prevalence of and factors associated with fewer than 20 remaining teeth in**  
5  
6 **Taiwanese adults with disabilities: A community-based cross-sectional study**  
7

8 †Mei-Yu Pan, RN, MSN, Department of Nursing, Chang Gung University of Science  
9 and Technology, Chiayi, Taiwan. PhD candidate, Institute of Medical Sciences,  
10 Tzu Chi University, Hualien, Taiwan.  
11  
12

13 †Tsung-Cheng Hsieh, PhD, Institute of Medical Sciences, Tzu Chi University, Hualien,  
14 Taiwan.  
15  
16

17 Hung-Cheng Tai, PhD, Department of General Education, Chang Gung University of  
18 Science and Technology, Chiayi, Taiwan.  
19  
20

21 Ming-Shyan Lin, MD, Department of Cardiology, Chang Gung Memorial Hospital,  
22 Chiayi, Taiwan.  
23  
24

25 Yu-Chen Lin, MS, RN, Director, Department of Health Promotion, Chiayi Bureau of  
26 Health, Taiwan.  
27  
28

29 Mei-Yen Chen, RN, PhD, Professor, College of Nursing, Chang Gung University of  
30 Science and Technology, Chiayi, Taiwan. Research Fellow in Chang Gung  
31 Memorial Hospital, Chiayi, Taiwan.  
32  
33  
34  
35  
36  
37  
38  
39  
40  
41  
42  
43  
44  
45  
46  
47  
48  
49  
50  
51  
52  
53  
54  
55  
56  
57  
58  
59  
60

† **Equal contribution**

**Corresponding author:**

Address Correspondence to: Mei-Yen Chen, No. 2, Chiapu Rd. West Sec., Putz City,  
Chiayi County 61363, Taiwan. Tel: +886 (5) 3628800 ext. 2201; Fax: +886 (5)  
3628866. E-mail: [meiyen@mail.cgust.edu.tw](mailto:meiyen@mail.cgust.edu.tw)

**Keywords**

Disabilities; number of remaining teeth; edentulous; health promotion; oral hygiene

Word count: 4614



## ABSTRACT

**Objectives:** To examine the prevalence of and the factors associated with a number of remaining teeth (NRT) < 20 among adults with disabilities.

**Design:** A community-based, cross-sectional descriptive study.

**Setting:** This study was part of a health-promotion program designed for community-dwelling adults with disabilities.

**Participants:** A total of 549 adults with disabilities, aged 20–80 years, living in the community in Chiayi County in Taiwan.

**Outcome measures:** Various parameters, including NRT, oral health behaviors (i.e., oral hygiene, dietary habits, and substance use), comorbidities, disability classification, and capability for performing activities of daily living, were measured. Data were statistically analyzed using descriptive statistics and multivariate logistic regression analysis.

**Results:** The mean NRT was 18.1 (standard deviation = 10.9); 44.8% of participants had NRT < 20 (including 13.7% edentulous participants). Most participants had poor oral hygiene: 83.4% reported seldom using dental floss, 78% did not undergo regular 6-monthly dental check-ups, and 77.4% seldom brushed their teeth after meal. After adjusting for potentially confounding variables, the intellectual disability group had a significantly higher risk of an NRT < 20 than the physical disability group (odds ratio: 2.30, 95% CI: 1.30–4.08). Additionally, the rare use of dental floss and hypertension significantly increased the possibility of an NRT < 20 (odds ratio: 1.73–2.12, 95% CI: 1.15–3.71).

**Conclusions:** An NRT < 20 and edentulism were highly prevalent among adults with

1  
2  
3  
4 disabilities, who displayed poor oral hygiene behaviors. Adults with intellectual  
5  
6 disabilities had a greater likelihood of having an NRT < 20 than did those with  
7  
8 physical disability. In addition to unmodifiable factors, the poor use of dental floss  
9  
10 was significantly associated with an NRT < 20.  
11  
12

### 13 14 15 **Strengths and limitations of this study** 16

- 17 ● Few studies have reported the prevalence of and factors associated with few  
18 remaining teeth among adults with disabilities, particularly in those residing in  
19 communities.  
20  
21
- 22 ● These results highlight the value of nurse-led health promotion programs and  
23 implementation of a multidisciplinary approach for the early detection of a low  
24 number of remaining teeth in community-dwelling adults with disabilities.  
25  
26
- 27 ● The limitations of the study include the non-randomized sampling strategy and  
28 recruitment of individuals with disabilities that did not preclude mobility in  
29 coming to the examination center, which may hinder generalization of our  
30 findings.  
31  
32
- 33 ● Other shortcomings regarding self- and/or caregiver-reported behaviors are  
34 social desirability, and the recall process might involve biases due to poor  
35 memory retrieval.  
36  
37  
38  
39  
40  
41  
42  
43  
44  
45  
46  
47  
48  
49  
50  
51  
52  
53  
54  
55  
56  
57  
58  
59  
60

## 1 INTRODUCTION

2 Having 20 teeth or more helps adults maintain good oral function and overall  
3 health. Teeth are recognized as calcified structures in the mouth, with the primary  
4 purpose of mastication, but act as part of the broader digestive system, to help the  
5 body obtain nutrition.<sup>1-3</sup> Other key functional aspects of teeth include speaking and  
6 communication, facial appearance, facilitating interpersonal relationships, enhancing  
7 quality of life, systemic health, and cognitive function; teeth are also associated with  
8 disability status, and even with mortality.<sup>3-6</sup> Unfortunately, 3.9 billion individuals  
9 worldwide experience oral disorders, including untreated caries, severe periodontal  
10 disease, and severe tooth loss, thereby prolonging the years lived with disability.<sup>4</sup> In  
11 fact, as early as 1991, Japan conducted a series of oral campaigns called the “8020” to  
12 encourage citizens to maintain at least 20 remaining teeth through the age of 80.<sup>3</sup>  
13 Previous studies on elderly people also proved that the lower the number of remaining  
14 teeth (NRT), the greater the impacts on individuals’ health. These impacts include the  
15 higher risks of cognitive impairments, decreased self-care capabilities, heart rate  
16 acceleration, influences on the quality of life, and decreased cumulative survival  
17 rate.<sup>1,3</sup> NRT has become an important indicator of oral and overall health for adults.

18 Awareness of the factors associated with an NRT < 20 forms the basis for good  
19 oral care. Of all the risk factors for an NRT < 20, age is probably the primary  
20 factor,<sup>7-10</sup> but it is not a controllable or reversible factor, neither are sex and  
21 education.<sup>10-12</sup> Therefore, public health professionals concentrate on risk factors that  
22 can be modified. Other factors associated with tooth loss include hypertension,  
23 diabetes mellitus, hyperlipidemia, poor oral hygiene, unhealthy diet, smoking, and  
24 harmful alcohol consumption,<sup>10-11, 13-15</sup> but those that are specific for individuals with  
25 disabilities remain unclear.

1  
2  
3  
4 1 The oral health condition of disabled individuals is often worse than that of  
5  
6 2 non-disabled adults.<sup>2, 16-23</sup> Utilization of oral health services is also far lower than the  
7  
8 3 average for this group.<sup>16-17, 24</sup> The World Health Organization has warned that, as the  
9  
10 4 population ages and chronic diseases increase, there will be an increase in the rate of  
11  
12 5 disability. Currently, more than a billion people worldwide (15%) live with some form  
13  
14 6 of disability, with 2–4% of those over the age of 15 years having significant  
15  
16 7 difficulties in functioning. In addition, due to poverty and difficulties with mobility,  
17  
18 8 the disabled are particularly vulnerable in terms of accessing satisfactory health care  
19  
20 9 services. They are also more likely to engage in risky health behaviors and to be  
21  
22 10 affected by more complications, more comorbidities, faster degeneration, and earlier  
23  
24 11 mortality.<sup>25</sup> In Taiwan, there are more than 1.1 million people with disabilities (4.8%  
25  
26 12 of the population).<sup>26</sup> Research has shown that disabled adults rarely use oral health  
27  
28 13 services,<sup>27</sup> even though the government has already increased their oral care services.  
29  
30 14 These premium subsidies funded by the National Health Insurance (NHI) system  
31  
32 15 include use of fluoride gel/varnishes, more frequent dental scaling, and a bonus for  
33  
34 16 the dentists treating patients with specific disabilities.<sup>28</sup> In terms of human rights,  
35  
36 17 preventing the increase in levels of disability, as well as reducing the caregivers'  
37  
38 18 burdens, which are issues relating to oral health care for vulnerable groups, deserve  
39  
40 19 much attention.

41  
42  
43  
44  
45  
46 20 However, although some previous studies have focused on  
47  
48 21 institution-accommodated adults with disabilities,<sup>2, 18</sup> fewer reports have discussed  
49  
50 22 disabled individuals living in communities. The prevalence of NRT < 20 and factors  
51  
52 23 potentially relevant to oral health among non-institutional disabilities were also  
53  
54 24 seldom discussed. Therefore, the aims of this study were to explore the prevalence of  
55  
56 25 and factors associated with an NRT < 20 among community-dwelling adults with  
57  
58  
59  
60

1 disabilities in Taiwan, and explore the oral health behaviors among the participants.

2

### 3 **METHODS**

#### 4 **Design, sample, and setting**

5 This study, which was part of a second-year health-promotion program designed  
6 for community-dwelling adults with disabilities, was led by a nursing team in  
7 collaboration with a district hospital and the Bureau of Health Promotion of Chiayi  
8 County in Taiwan.<sup>25</sup> In Chiayi County, visual impairment, hearing impairment,  
9 intellectually disability, and physical disability affect more than 38,800 individuals,  
10 accounting for 64% of the local disabled population. This paper forms part of a series  
11 of reports regarding health issues of community-based people with disabilities. A  
12 community-based health screening survey was conducted between July and December  
13 in 2014 using a cross-sectional descriptive design.

14 Participants were selected through convenience sampling from the registry of the  
15 government's social welfare center.<sup>21</sup> The inclusion criteria were: (1) certified adults'  
16 primary disability, involving either visual impairment, hearing impairment,  
17 intellectual disability, or physical disability; (2) age  $\geq 20$  years; (3) the ability to  
18 complete the written questionnaire in either Mandarin or Taiwanese, with assistance  
19 from the interviewers; (4) the ability to walk to the examination center with/without  
20 help; and (5) the ability to sign the consent forms prior to recruitment. Exclusion  
21 criteria were: (1) living in institutions; (2) an inability to answer questions; or (3)  
22 having a serious disease, such as kidney disease requiring dialysis or cancer.

#### 23 **Measurements**

24 1. *Number of remaining teeth (NRT)*: The NRT was obtained by research  
25 assistants by asking the participants to open his/her mouths and then counting the total

1 number of natural teeth and fixed dentures, after discharging the removable dentures  
2 in the oral cavities. Root fragments without a crown were excluded. As edentulism is  
3 an alternative measure of oral health status,<sup>29</sup> it was distinguished as an outcome to  
4 present a fuller picture of NRT. Thus, three categories, edentulous (NRT = 0),  
5 less-dentate (NRT = 1-19), and more-dentate (NRT  $\geq$  20) were defined. The  
6 edentulous and less-dentate groups are referred to as those with fewer teeth (NRT <  
7 20).

8       2. *Oral health behaviors:* Oral health behaviors were measured in terms of  
9 seven habits, i.e., brushing teeth, using dental floss, visiting dentists or undergoing  
10 dental scaling, drinking alcohol, smoking, five groups of nutrition, and water intake.  
11 This information was collected through standardized personal interviews using a  
12 structured questionnaire that was based on the published literature.<sup>7, 10</sup> The  
13 participants were asked to recall their oral health behaviors up to a year previously  
14 and/or when they were dentate.

15       In this study, answers regarding the brushing of teeth were categorized as  
16 frequent ( $\geq$  twice a day) vs. infrequent (< twice a day). As for immediate brushing  
17 teeth after a meal, participants were classified as “often” if they responded with  
18 “usually” or “frequently”, or “seldom” if they responded with “never” or  
19 “sometimes”. For using dental floss, responses were classified as “often” if dental  
20 floss was used to clean interdental spaces  $\geq$  once a day, or “seldom” if the  
21 respondents’ answer was “never” or “sometimes.” Regarding visits to dentists,  
22 participants were classified as “regular” if they visited dentists and underwent scaling  
23 every 6 months, or “irregular” if they responded “never” or “sometimes.” For  
24 questions “Do you smoke cigarettes or drink alcohol?”, participants were classified as  
25 “none or formerly” if they had never engaged in these behaviors or had stopped

1 doing so for the past year, or as “current users.” Regarding five groups of nutrition  
2 intake, the response was considered “balanced” if the respondents usually or always  
3 had five groups of nutrition (i.e., meat, milk, grains, vegetables, and fruit) each day, or  
4 “unbalanced” if they never or sometimes had these foods. In terms of water intake,  
5 answers were categorized as sufficient ( $\geq 1500$  mL per day) vs. insufficient ( $< 1500$   
6 mL per day). Participants, especially those intellectual and hearing disabled, were  
7 guided to reply their habits through visual aids, samples, progressive interactions, and  
8 caregivers’ confirmations when necessary.

9 *3. Background information:* Background information comprised three  
10 sections. First, demographic variables obtained from the questionnaires, including  
11 age, gender, and educational attainment (years of education received, or level of  
12 school completed). Second, prevalence of the three common chronic diseases (i.e.,  
13 hypertension, diabetes mellitus, and hyperlipidemia). The three diseases were  
14 assessed using a medical history (diagnosed by a physician) and/or physiological  
15 biomarkers, including blood pressure (BP), fasting blood glucose (FBG), triglyceride  
16 (TG), total cholesterol (TC), low-density lipoprotein (LDL) cholesterol, and  
17 high-density lipoprotein (HDL) cholesterol levels. Following the national standard of  
18 the Ministry of Health and Welfare,<sup>30</sup> blood samples were evaluated and BP was  
19 measured at the time of the study, applying standard procedures. The three common  
20 chronic diseases were defined as (1) diabetes mellitus (FBG  $\geq 126$  mg/dL, or if ever  
21 diagnosed by a doctor); (2) hypertension (systolic/diastolic BP  $\geq 140/90$  mmHg, or if  
22 ever diagnosed by a doctor); and (3) hyperlipidemia (LDL  $\geq 160$  mg/dL, TC  $\geq 240$   
23 mg/dL, TG  $\geq 200$  mg/dL, or if ever diagnosed by a doctor). Third, disability  
24 classification and capability of activity of daily living (ADL). Primary disabilities,  
25 such as physical, hearing, vision, or intellectual disabilities, were identified and

1 confirmed by the certificates issued by the Taiwan government<sup>26</sup> prior to the  
2 interviews. ADL capability, judged using the Barthel ADL Index of feeding,  
3 grooming, bathing, mobility, toilet use, transfer, etc., reflected the dependence level of  
4 participants who required external assistance to complete these activities.  
5 “Independent” was coded if external assistance was unnecessary, or “dependent” if it  
6 was needed.

### 7 **Procedures and ethical considerations**

8 This study was approved by the relevant institutional review board of Chang  
9 Gung Memorial Hospital (IRB 102-3331B), and all procedures complied with the  
10 ethical guidelines. Participants were invited to participate in the study via letters sent  
11 by the public health nurses, and were fully informed about the purposes of the study.  
12 The letter emphasized the confidentiality of all collected data. Written consent forms  
13 were appropriately explained to and signed by participants and/or their guardians  
14 before arranging free medical evaluations. These evaluations, including blood  
15 sampling and physical check-ups, were conducted by the local hospital staff on a  
16 weekend, in a school auditorium, followed by individual interviews. To create a  
17 caring and friendly environment, each participant was accompanied by a community  
18 volunteer during the health screenings. If a participant was not an effective responder,  
19 a familiar caregiver, who was normally a family member(s) with whom they were  
20 living, was allowed to represent the participant in answering the questions.

21 The NRT was calculated carefully by research assistants who were trained by a  
22 research team that including the investigators and a dentist. Details of the interviews  
23 and measurement procedures have been reported in our previous study.<sup>10</sup> Face and  
24 content validity of the instrument were judged to be good (0.88–0.91) by a panel of  
25 five experts: a faculty member in public health and health education, a dentist, a social



1 worker in a disabled institution, and two nursing faculty members who specialize in  
2 the field of long-term care.

### 3 **Statistical analyses**

4 Quantitative data were analyzed using SPSS v. 22.0 software. Descriptive  
5 statistical data are presented as numbers and percentages for categorical variables, and  
6 as means  $\pm$  standard deviations for continuous variables. Chi-square tests for  
7 categorical variables, as univariate analyses, were performed to compare those in the  
8 edentulous (NRT = 0), less-dentate (NRT = 1-19), and more-dentate (NRT  $\geq$  20)  
9 groups in terms of their background information and oral health behaviors. Stepwise  
10 logistic regression analyses, for identifying the modifiable factors associated with  
11 having fewer teeth (NRT < 20), were conducted in three models. The first model,  
12 model 1, a crude model without adjustment, was used to examine the associations  
13 between exposures and NRT < 20. The second, model 2, was partially adjusted, for  
14 three irreversible confounding factors, including age, gender, and education. The third,  
15 model 3, was fully adjusted for all exposures in the current study. For models 2 and 3,  
16 multivariable logistic regression analysis with a forward variable entry method (entry  
17 criteria: p-value < 0.05 in univariate analysis) was implemented. The odds ratio (OR)  
18 with 95% confidence interval (CI) and corresponding p-value were obtained by  
19 logistic regression model. All statistical assessments adopted two-tailed tests, and the  
20 p-value cut-off point for statistical significance was set as 0.05.

### 21 **RESULTS**

22 Of the 603 individuals invited to participate in the study, 549 participants were  
23 enrolled in this analysis, but 18 failed to complete the NRT measurement. The  
24 response rate was therefore 91%. The majority of the participants were male (54.3%),  
25 aged 20–80 years (mean age  $58.8 \pm 13.9$ ), and were not well-educated (educational

attainment  $\leq 9$  years: 67.4%). The distribution of disabilities by type was: physical (55.9%), intellectual (19.7%), hearing (15.7%), and vision (8.7%). Most participants (88.7%) did not require assistance in the activities of daily living (ADL), as they only had a mild degree of disability. In addition, the prevalence rates of hypertension, hyperlipidemia, and diabetes mellitus were 56.5%, 49.9%, and 23.9%, respectively. Moreover, chi-square tests results indicated that participants who were of older age, had lower education, and had histories of hypertension and/or diabetes had significantly greater likelihoods of having fewer teeth and/or edentulous (Table 1).

Table 1. Background information of the subjects, according to dentition status

| Variables                 | Dentate <sup>†</sup>      |                      | Edentulous <sup>†</sup> | Total<br>(n=549) |
|---------------------------|---------------------------|----------------------|-------------------------|------------------|
|                           | NRT: $\geq 20$<br>(n=293) | NRT: 1-19<br>(n=165) | NRT: 0<br>(n=73)        |                  |
| Age (years)*              | 53.8 $\pm$ 13.3           | 63.1 $\pm$ 12.4      | 69.5 $\pm$ 8.1          | 58.8 $\pm$ 13.9  |
| <65                       | 228 (77.8)                | 81 (49.1)            | 13 (17.8)               | 331 (60.3)       |
| $\geq 65$                 | 65 (22.2)                 | 84 (50.9)            | 60 (82.2)               | 218 (39.7)       |
| Gender                    |                           |                      |                         |                  |
| Female                    | 123 (42.0)                | 83 (50.3)            | 38 (52.1)               | 251 (45.7)       |
| Male                      | 170 (58.0)                | 82 (49.7)            | 35 (47.9)               | 298 (54.3)       |
| Educational attainment*   |                           |                      |                         |                  |
| >9 years                  | 132 (45.1)                | 37 (22.4)            | 6 (8.2)                 | 179 (32.6)       |
| $\leq 9$ years            | 161 (54.9)                | 128 (77.6)           | 67 (91.8)               | 370 (67.4)       |
| Hypertension*             |                           |                      |                         |                  |
| No                        | 154 (52.6)                | 54 (32.7)            | 23 (31.5)               | 239 (43.5)       |
| Yes                       | 139 (47.4)                | 111 (67.3)           | 50 (68.5)               | 310 (56.5)       |
| Diabetes mellitus*        |                           |                      |                         |                  |
| No                        | 235 (80.2)                | 121 (73.3)           | 47 (64.4)               | 418 (76.1)       |
| Yes                       | 58 (19.8)                 | 44 (26.7)            | 26 (35.6)               | 131 (23.9)       |
| Hyperlipidemia            |                           |                      |                         |                  |
| No                        | 138 (47.1)                | 88 (53.3)            | 37 (50.7)               | 275 (50.1)       |
| Yes                       | 155 (52.9)                | 77 (46.7)            | 36 (49.3)               | 274 (49.9)       |
| Disability classification |                           |                      |                         |                  |

|                                |            |            |           |            |
|--------------------------------|------------|------------|-----------|------------|
| Physical disability            | 166 (56.7) | 93 (56.4)  | 38 (52.1) | 307 (55.9) |
| Intellectual disability        | 64 (21.8)  | 32 (19.4)  | 8 (11.0)  | 108 (19.7) |
| Hearing impairment             | 44 (15.0)  | 22 (13.3)  | 17 (23.3) | 86 (15.7)  |
| Vision impairment              | 19 (6.2)   | 18 (10.9)  | 10 (13.7) | 48 (8.7)   |
| Capability of ADL <sup>†</sup> |            |            |           |            |
| Independent                    | 263 (89.8) | 148 (89.7) | 32 (84.9) | 486 (88.7) |
| Dependent                      | 30 (10.2)  | 17 (10.3)  | 11 (15.1) | 62 (11.3)  |

Data are expressed as numbers (percentages) or means  $\pm$  SD. NRT, number of remaining teeth; ADL, activities of daily living. \*  $p < 0.05$  derived from  $\chi^2$  tests. <sup>†</sup>Missing data: 1 in ADL, 18 in NRT.

As shown in Table 2, the participants had fewer teeth (mean NRT  $18.1 \pm 10.9$ ; median 21.0; NRT  $< 20$ : 44.8%; NRT = 0: 13.7%), and had poor oral hygiene (seldom dental floss: 83.4%; irregular dental visit: 78.0%; seldom brushed teeth after meal: 77.4%; daily teeth brushing:  $1.8 \pm 0.9$  times). They also had other unfavorable behaviors (insufficient water intake/unbalanced nutrition: 40.3%; smoking: 25.3%; drinking alcohol: 16.2%). Chi-square test results showed that participants with the characteristics of rare dental floss use, irregular dentist visits, or unbalanced nutrition, had a significantly higher prevalence of having fewer and/or no teeth.

Table 2. Number of remaining teeth and oral health behaviors according to dentition status

| Variables <sup>#</sup>            | Dentate <sup>†</sup>      |                       | Edentulous <sup>†</sup> | Total<br>(n = 549)     |
|-----------------------------------|---------------------------|-----------------------|-------------------------|------------------------|
|                                   | NRT: $\geq 20$<br>(n=293) | NRT: 1-19<br>(n=165)  | NRT: 0<br>(n=73)        |                        |
| Group of NRT (n=531) <sup>†</sup> | 26.7 $\pm$ 3.7(27.0)      | 10.8 $\pm$ 5.5 (12.0) | -                       | 18.1 $\pm$ 10.9 (21.0) |
| 0                                 |                           |                       |                         | 73 (13.7)              |
| 1-19                              |                           |                       |                         | 165 (31.1)             |
| $\geq 20$                         |                           |                       |                         | 293 (55.2)             |
| Oral hygiene                      |                           |                       |                         |                        |
| Times of daily brushing           |                           |                       |                         | 1.8 $\pm$ 0.9          |
| teeth                             |                           |                       |                         |                        |
| Frequent ( $\geq 2$ times)        | 204 (69.5)                | 116 (70.3)            | 44 (60.3)               | 372 (67.8)             |
| Infrequent ( $< 2$ times)         | 89 (30.4)                 | 49 (29.7)             | 29 (39.7)               | 177 (32.2)             |

|    |                                |            |            |           |            |
|----|--------------------------------|------------|------------|-----------|------------|
| 1  |                                |            |            |           |            |
| 2  |                                |            |            |           |            |
| 3  |                                |            |            |           |            |
| 4  |                                |            |            |           |            |
| 5  | Brushing teeth after meal      |            |            |           |            |
| 6  | Often                          | 62 (21.2)  | 37 (22.4)  | 22 (30.1) | 124 (22.6) |
| 7  | Seldom                         | 231 (78.8) | 128 (77.6) | 51 (69.9) | 425 (77.4) |
| 8  |                                |            |            |           |            |
| 9  | Using dental floss*            |            |            |           |            |
| 10 | Often ( $\geq$ once a day)     | 67 (22.9)  | 17 (10.3)  | 7 (9.6)   | 91 (16.6)  |
| 11 | Seldom ( $<$ once a day)       | 226 (77.1) | 148 (89.7) | 66 (90.4) | 458 (83.4) |
| 12 |                                |            |            |           |            |
| 13 | Visiting dentist per 6 months* |            |            |           |            |
| 14 | Regular                        | 73 (24.9)  | 38 (23.0)  | 7 (9.6)   | 121 (22.0) |
| 15 | Irregular                      | 220 (75.1) | 127 (77.0) | 66 (90.4) | 428 (78.0) |
| 16 |                                |            |            |           |            |
| 17 | Water intake per day           |            |            |           |            |
| 18 | Sufficient ( $\geq$ 1500 ml)   | 186 (63.5) | 98 (59.4)  | 35 (47.9) | 328 (59.7) |
| 19 | Insufficient ( $<$ 1500 ml)    | 107 (36.5) | 67 (40.6)  | 38 (52.1) | 221 (40.3) |
| 20 |                                |            |            |           |            |
| 21 | Five nutrition groups per day* |            |            |           |            |
| 22 | Balanced                       | 191 (65.2) | 84 (50.9)  | 47 (64.4) | 328 (59.7) |
| 23 | Unbalanced                     | 102 (34.8) | 81 (49.1)  | 26 (35.6) | 221 (40.3) |
| 24 |                                |            |            |           |            |
| 25 | Smoking habit                  |            |            |           |            |
| 26 | Never or formerly              | 218 (74.4) | 126 (76.4) | 53 (72.6) | 410 (74.7) |
| 27 | Current users                  | 75 (25.6)  | 39 (23.6)  | 20 (27.4) | 139 (25.3) |
| 28 |                                |            |            |           |            |
| 29 | Alcohol habit                  |            |            |           |            |
| 30 | Never or formerly              | 245 (83.6) | 139 (84.2) | 63 (86.3) | 460 (83.8) |
| 31 | Current users                  | 48 (15.4)  | 26 (15.8)  | 10 (13.7) | 89 (16.2)  |
| 32 |                                |            |            |           |            |
| 33 |                                |            |            |           |            |
| 34 |                                |            |            |           |            |

1 Data are expressed as numbers (percentages) or means  $\pm$  SD (medians). NRT, number of remaining  
 2 teeth. # All variables except NRT asked the edentulous subjects to recall their behaviors when dentate.  
 3 \*  $p < 0.05$  derived from  $\chi^2$  tests. †18 missing data.

4  
 5 Regarding Table 3, after adjusting for all exposures (in model 3), the intellectual  
 6 disability group had a significantly higher possibility of an NRT  $<$  20 than the  
 7 physical disability group (OR: 2.30, 95% CI: 1.30–4.08), while the risk of an NRT  $<$   
 8 20 in the other two subgroups were not increased. From the results of three models,  
 9 i.e., model 1, model 2, and model 3, the demographic variables seemed to confound  
 10 an NRT  $<$  20 associated with disability classifications. The other modifiable factors  
 11 associated with an NRT  $<$  20 were the rare use of dental floss (OR: 2.12–2.64, 95%  
 12 CI: 1.21–4.37) and a history of hypertension (OR: 1.61–2.32, 95% CI: 1.09–3.31).

To exempt the risk of over adjustment, further analyses of correlations between three variables of hypertension, diabetes and hyperlipidemia were done as they are common comorbidities. Results showed lower correlations were identified ( $r = 0.11-0.16$ ,  $p > 0.05$ , not shown in tables) that they did not influence the model 3.

Table 3. Odds ratios (95% CI) of the factors associated with NRT < 20 (n = 531<sup>†</sup>)

| Variables/ Values                  | Model 1           | Model 2           | Model 3           |
|------------------------------------|-------------------|-------------------|-------------------|
|                                    | OR (95% CI)       | OR (95% CI)       | OR (95% CI)       |
| Age (years)                        | 1.08 (1.06-1.09)* | 1.07 (1.05-1.08)* | 1.07 (1.05-1.10)* |
| Gender                             |                   |                   |                   |
| Female <sup>¶</sup>                |                   |                   |                   |
| Male                               | 0.70 (0.50-0.99)* | §                 | §                 |
| Educational attainment             |                   |                   |                   |
| > 9 years <sup>¶</sup>             |                   |                   |                   |
| ≤ 9 years                          | 3.72 (2.49-5.56)* | 2.01 (1.28-3.14)* | 1.96 (1.23-3.10)* |
| Hypertension                       |                   |                   |                   |
| No <sup>¶</sup>                    | -                 | -                 | -                 |
| Yes                                | 2.32 (1.62-3.31)* | 1.61 (1.09-2.39)* | 1.73 (1.15-2.60)* |
| Diabetes mellitus                  |                   |                   |                   |
| No <sup>¶</sup>                    | -                 | -                 | -                 |
| Yes                                | 1.69 (1.13-2.52)* | §                 | §                 |
| Hyperlipidemia                     |                   |                   |                   |
| No <sup>¶</sup>                    | -                 | -                 | -                 |
| Yes                                | 0.81 (0.57-1.13)  | §                 | §                 |
| Disability classification          |                   |                   |                   |
| Physical disability <sup>¶</sup>   | -                 | -                 | -                 |
| Intellectual disability            | 0.79 (0.50-1.25)  | 2.20 (1.26-3.84)* | 2.30 (1.30-4.08)* |
| Hearing impairment                 | 1.12 (0.69-1.83)  | 0.76 (0.44-1.32)  | 0.75 (0.43-1.32)  |
| Vision impairment                  | 1.87 (0.99-3.49)  | 1.54 (0.75-3.13)  | 1.48 (0.72-3.04)  |
| Capability of ADL                  |                   |                   |                   |
| Independent <sup>¶</sup>           | -                 | -                 | -                 |
| Dependent                          | 1.17 (0.68-2.02)  | §                 | §                 |
| Oral health behaviors <sup>#</sup> |                   |                   |                   |
| Daily brushing teeth               |                   |                   |                   |

|    |                                |                   |                   |                   |
|----|--------------------------------|-------------------|-------------------|-------------------|
| 1  |                                |                   |                   |                   |
| 2  |                                |                   |                   |                   |
| 3  |                                |                   |                   |                   |
| 4  | Frequent <sup>†</sup>          | -                 | -                 | -                 |
| 5  | Infrequent                     | 1.12 (0.77-1.61)  | §                 | §                 |
| 6  | Using dental floss             |                   |                   |                   |
| 7  | Often <sup>†</sup>             | -                 | -                 | -                 |
| 8  | Seldom                         | 2.64 (1.60-4.37)* | 2.22 (1.28-3.83)* | 2.12 (1.21-3.71)* |
| 9  | Visiting dentist               |                   |                   |                   |
| 10 | Regular <sup>†</sup>           | -                 | -                 | -                 |
| 11 | Irregular                      | 1.42 (0.94-2.16)  | §                 | §                 |
| 12 | Water intake                   |                   |                   |                   |
| 13 | Sufficient <sup>†</sup>        | -                 | -                 | -                 |
| 14 | Insufficient                   | 1.37 (0.97-1.95)  | §                 | §                 |
| 15 | Five nutrition groups per day  |                   |                   |                   |
| 16 | Balanced <sup>†</sup>          | -                 | -                 | -                 |
| 17 | Unbalanced                     | 1.53 (1.08-2.17)* | 1.58(1.07-2.34)*  | §                 |
| 18 | Smoking habit                  |                   |                   |                   |
| 19 | Never or formerly <sup>†</sup> | -                 | -                 | -                 |
| 20 | Current users                  | 0.96 (0.65-1.42)  | §                 | §                 |
| 21 | Alcohol habit                  |                   |                   |                   |
| 22 | Never or formerly <sup>†</sup> | -                 | -                 | -                 |
| 23 | Current users                  | 0.91 (0.57-1.46)  | §                 | §                 |

1 NRT, number of remaining teeth; ADL, activities of daily living; OR, odds ratio; CI, confidence  
 2 interval. Model 1: crude; model 2: adjusted for age, gender, and education; model 3: model 2 + all  
 3 variables in Table 3. <sup>†</sup>18 missing data. \* p value <0.05. # Variables reflects edentulous subjects' recall of  
 4 their behaviors when dentate. <sup>†</sup>Reference group. §: Variables were not selected into the model.

## 1 DISCUSSION

2 This study featured a nurse-led health program aimed at promoting the oral  
3 health of disabled individuals. Four key findings emerged: first, fewer teeth were  
4 counted and there was a higher prevalence of an NRT < 20 and edentulism in the  
5 present study population than in those reported in the existing literature. According to  
6 previous research, the average NRT for non-disabled people is approximately 25,<sup>10</sup>  
7 and only 16% of these individuals have an NRT < 20.<sup>2,10</sup> However, in this study, the  
8 average NRT in disabled individuals was 18.1, and 44.8% had an NRT < 20, which  
9 indicated a significantly worse oral health condition. Even when ruling out the  
10 edentulous, the average NRT was 20.9 and prevalence of NRT < 20 was 36% among  
11 the dentate subgroup. The slight changes in the statistics from 18.1 to 20.9 and 44.8%  
12 to 36% do not indicate a change in the trend. The literature supports the view that  
13 adults with disabilities commonly exhibit poor oral hygiene and have a lower NRT  
14 than non-disabled people, owing to their limited capabilities, in terms of cognitive  
15 comprehension, body coordination, or muscle power.<sup>11,19</sup> In fact, the prevalence of an  
16 NRT < 20 in this study was not only higher than the figures previously reported for  
17 non-disabled people, but was also higher than that reported in a Belgian study of  
18 people with disabilities (33%).<sup>2</sup> Moreover, the edentulous rate of 13.7% found in this  
19 study was also higher than the edentulous rate of 8.9% reported by a study conducted  
20 in the USA.<sup>16</sup>

21 Second, most disabled participants reported having inadequate oral hygiene  
22 behaviors in general. These behaviors, including seldom using dental floss, irregular  
23 dental visits and scaling, and rarely brushing teeth after meals, were factors associated  
24 with tooth loss in previous reports,<sup>1,7-8</sup> and may also affect other systemic diseases.<sup>5</sup>  
25 The prevalence of these behaviors in this study was 83.4%, 78%, and 77.4%,

1  
2  
3  
4 1 respectively, which was much higher than in the non-disabled population (about  
5  
6 2 28–70%);<sup>7, 10, 15-17</sup> and were also greater than those in disabled individuals in other  
7  
8 3 countries (29–51%).<sup>16, 24</sup> Particularly, those who were edentulous had worse oral  
9  
10 4 hygiene behaviors than those who were dentate. Although irregular dental visits were  
11  
12 5 not a significant factor for an NRT < 20 in the current study, most previous studies  
13  
14 6 indicated the importance of regular dental care.<sup>1-2, 31-32</sup> To encourage regular dental  
15  
16 7 care, the Taiwanese government has provided incentives under the NHI system, by  
17  
18 8 requiring only payment of a registration and copayment fee, for use of oral health  
19  
20 9 services by the disabled.<sup>28</sup> However, individuals with disabilities typically do not visit  
21  
22 10 dentists until their dental problems become too serious to be treated, and tooth  
23  
24 11 extraction is often unavoidable. The issue of regular dental visits to help maintain a  
25  
26 12 greater number of teeth in the disabled should be explored in future.

27  
28  
29  
30  
31 13 Third, adults with intellectual disability have an increased possibility of having an  
32  
33 14 NRT < 20. In this study, the extreme case, i.e., edentulous, showed a prevalence of  
34  
35 15 7.7% among those with intellectual disability, which was lower than that reported in  
36  
37 16 the USA (10.9%).<sup>22</sup> In comparison with those with physical disability, the subgroup of  
38  
39 17 individuals with intellectual disabilities had a higher likelihood of having fewer teeth,  
40  
41 18 which is consistent with the findings of previous studies.<sup>2,9,18,22</sup> Lindsay<sup>33</sup> attributes  
42  
43 19 this phenomenon to their preferences for eating desserts, sweets, and drinking soft  
44  
45 20 drinks; similarly, their reduced capacity for self-control owing to their cognitive  
46  
47 21 impairments could also modulate this effect. These individuals often are not fully  
48  
49 22 capable of independent self-care, and their caregivers may find it difficult to perform  
50  
51 23 oral hygiene activities for them over the long term. In addition, adults with  
52  
53 24 developmental disabilities often appear to have disorders, such as gastro-esophageal  
54  
55 25 reflux disease, excessive salivation, and induced xerostomia triggered by antiepileptic  
56  
57  
58  
59  
60



1 medications, which could increase the possibility of poor oral health.

2 Fourth, the use of dental floss is a modifiable factor associated with the NRT.  
3 Except for intellectual disabilities, other associated factors, such as the rare use of  
4 dental floss and hypertension<sup>1,10,13</sup> are similar to the factors associated with NRT in  
5 non-disabled individuals. Among these, dental floss use is the most malleable  
6 component that can be addressed by instruction from public health practitioners. This  
7 study found that most disabled adults (77.4%) lacked the habit of cleaning teeth after  
8 meals, and brushed their teeth less often than twice a day. The practice of dental  
9 flossing may be a complementary oral hygiene step that can help to maintain the NRT.  
10 A previous systematic review has confirmed that brushing and flossing can  
11 significantly reduce plaque and gingivitis as compared with tooth brushing alone.<sup>14</sup>

12 It is the presence of dental plaque and food debris in the crevices between the  
13 teeth that encourage bacteria to flourish, activating the inflammatory response and the  
14 innate immune system in the human body. These bacteria induce swelling and  
15 bleeding of the gums, the destruction of periodontal tissues and alveolar bones, and  
16 the promotion of tooth mobility; thus, ultimately causing tooth loss.<sup>34-35</sup> The findings  
17 from some systematic reviews suggest that oral hygiene methods, such as tooth  
18 brushing, dental flossing, and/or interdental brushing are all effective means of  
19 eliminating the periodontal pathogens thriving in the buccal cavity<sup>14,36</sup> and even in the  
20 blood.<sup>37</sup>

21 However, people with disabilities may have difficulties flossing, due to  
22 disability-related issues with self-control, movement coordination, comprehension,  
23 etc., although nearly 90% of them in this study were categorized as having basic  
24 self-care ability in terms of ADL. Adopting a habit of dental flossing, and accuracy  
25 and thoroughness of dental cleaning processes, may even be demanding for some

1 non-disabled people, as well as for adults with disabilities. The assistance of  
2 interdental brushing, which is recognized as an easier and more effective method for  
3 reducing periodontal pathogens,<sup>36</sup> can also be considered as an alternative approach.

4 To address the problem of NRT < 20, oral hygiene instruction, a commonly used  
5 clinical technique, is imperative for improving oral hygiene. Since disabled adults  
6 may not cope with regular dental visits and examinations, integration of preventive  
7 and corrective oral health in their lives is highly beneficial.<sup>31</sup> Routine daily teeth  
8 cleaning is undoubtedly the most economic and convenient approach to ensure oral  
9 health. It can also reduce the fear of individuals with disabilities about accessing oral  
10 health services, and even shorten the scaling time required.<sup>38</sup> Unfortunately, previous  
11 studies have demonstrated that community-dwelling individuals with disabilities have  
12 worse oral health than those living in institutions.<sup>22, 39</sup> Since these participants were  
13 living at home with relatives, their families were generally more concerned with  
14 physiological diseases than with oral conditions, and were not aware of the  
15 importance of oral hygiene. Teeth cleaning was also typically perceived as the  
16 individuals' own responsibility, as these disabled people generally seemed to be  
17 capable of managing the task. However, they had a higher prevalence of an NRT < 20,  
18 which may imply that even if the participants had basic self-care ability, it does not  
19 mean that they are capable of achieving good quality oral hygiene. Their families  
20 sometimes opted to ignore these "trivial" matters, as they were already exhausted by  
21 the burden of care. Consequently, without professional guidance and tracking, daily  
22 cleaning of the teeth becomes a difficult task for community-based people with  
23 disabilities. A systematic review has concluded that additional oral hygiene instruction  
24 could help cultivate a higher quality of oral health behaviors; thus, ameliorating  
25 gingivitis and eradicating dental plaque.<sup>32</sup>

1 As many researchers claim that good oral health can improve almost every  
2 aspect of life, from overall health to self-esteem, communication, nutrition, quality of  
3 life, savings in medical expenses, and finding employment, for people with  
4 disabilities, in addition to relieving the burden on their care givers.<sup>17, 40</sup> To achieve the  
5 oral health goal of 8020,<sup>3</sup> more resources and attention should be invested to provide  
6 good oral care, matched to the individual's disability characteristics. Further  
7 integration of the social welfare networks, oral hygiene instructions, and coordination  
8 of medical professionals and caregivers for adults with disabilities are recommended.

### 9 **Limitations**

10 This study has some limitations. First, the participants' oral conditions were  
11 examined by research assistants, rather than by qualified dentists, due to constraints  
12 on the participants' cooperation and expectations. Only superficial features, such as  
13 the remaining number of natural and filled teeth were investigated; other thorough  
14 evaluations, such as those of caries and periodontal tissues, were not performed. Thus,  
15 potential oral problems may have been ignored or underestimated by the NRT figures  
16 reported here. Second, some selection bias may have been involved as the criteria for  
17 inclusion included the ability to travel from home to the nearby school where the  
18 examinations were conducted. The participants were mostly categorized as having  
19 mild disabilities, with limited variation. Their oral health conditions should thus be  
20 presumed to be generally better than those of individuals with more severe  
21 disabilities,<sup>27</sup> who were not included in this survey. The real situation of oral health  
22 for adults with disabilities may thus be even worse than that indicated by this study.  
23 Third, the self-reporting health behaviors questionnaire might trigger socially desired  
24 behaviors from participants implicitly directed by the research and/or researchers.  
25 Fourth, the participants were conveniently recruited from one location, rather than by

1 nationwide cluster sampling. The generalizability of the study results may therefore  
2 be limited. Finally, the cross-sectional study design has an inherent limitation in terms  
3 of investigating the causal inferences between variables. As it is a snapshot of a  
4 specific moment, the cross-sectional design did not track variables over a period of  
5 time to gain insight into the process. To address this limitation, we asked participants  
6 to recall their oral health behavior over the past year and/or when they were dentate.  
7 However, the recall process might generate another bias due to poor memory recall.

## 8 **CONCLUSION**

9 For community-dwelling individuals with disabilities, the prevalence of an NRT  
10 < 20 and edentulism were significantly greater than that reported in previous studies.  
11 Poor oral hygiene behaviors were identified as being a general characteristic of the  
12 participants. Adults with intellectual disability had a greater likelihood of tooth loss.  
13 The other two modifiable factors strongly associated with an NRT < 20 were the habit  
14 of seldom using dental floss and hypertension. As oral hygiene instructions are the  
15 least expensive and easiest way of integrating preventative intervention options for  
16 chronic diseases into daily activities, professionals should concentrate on this  
17 approach for individuals with disabilities and attempt to enhance their teeth cleaning  
18 awareness and capabilities. Finally, to satisfy the oral health needs of  
19 community-dwelling adults with disabilities, issues such as the risk factors associated  
20 with different types of disabilities, regular dental visits, and their special needs can be  
21 further explored.

## 22 **Conflict of interest**

23 The authors declare that they have no competing interests.

## 24 **Authors' contributions**

25 MYP and TCH: designing the study, collecting and analyzing data, and drafting the

1 paper. HCT and YCL: proofreading and revising the manuscripts. MYC: initializing,  
2 conceptualizing, and supervising the research process. All authors have read and  
3 approved the final manuscript.

#### 4 **Acknowledgments**

5 We thank all participants in this study and staff at the Chiayi Bureau of Health  
6 Promotion for their support, which made this study possible.

#### 7 **Funding**

8 The study was supported by a grant from Chang Gung Memorial Hospital (BMRP  
9 148).

#### 10 **Patient consent**

11 Obtained

#### 12 **Ethics approval**

13 This study was approved by the institutional review board of the ethical committee of  
14 Chang Gung Memorial Hospital (IRB 102-3331B)

15 **Data sharing statement** No additional data are available.

16

## References

1. Wang TF, Chen YY, Liou YM, et al. Investigating tooth loss and associated factors among older Taiwanese adults. *Arch Gerontol Geriatr* 2014;58(3):446-53.
2. Leroy R, Declerck D. Objective and subjective oral health care needs among adults with various disabilities. *Clin Oral Investig* 2013;17(8):1869-78.
3. Yamanaka K, Nakagaki H, Morita I, et al. Comparison of the health condition between the 8020 achievers and the 8020 non-achievers. *Int Dent J* 2008;58(3):146-50.
4. Marcenes W, Kassebaum NJ, Bernabe E, et al. Global burden of oral conditions in 1990-2010: a systematic analysis. *J Dent Res* 2013;92(7):592-7.
5. Linden GJ, Lyons A, Scannapieco FA. periodontal systemic associations: review of the evidence. *J Clin Periodontol* 2013;40(Suppl. 14):S8-S19.
6. Hayasaka K, Tomata Y, Aida J, et al. Tooth Loss and Mortality in Elderly Japanese Adults: Effect of Oral Care. *J Am Geriatr Soc* 2013;61(5):815-20.
7. Huang J-C, Peng Y-S, Fan J-Y, et al. Factors associated with numbers of remaining teeth among type 2 diabetes: a cross-sectional study. *J Clin Nurs* 2013;22(13-14):1926-32.
8. Hsu K-J, Yen Y-Y, Lan S-J, et al. Impact of oral health behaviours and oral habits on the number of remaining teeth in older Taiwanese dentate adults. *Oral Health Prev Dent* 2013;11(2):121-30.
9. Mac Giolla Phadraig C, McCallion P, Cleary E, et al. Total tooth loss and complete denture use in older adults with intellectual disabilities in Ireland. *J Public Health Dent* 2015;75(2):101-8.
10. Tsai SJ, Lin MS, Chiu WN, et al. Factors associated with having less than 20 natural teeth in rural adults: a cross-sectional study. *BMC Oral Health* 2015;15:158.
11. Jiang Y, Okoro CA, Oh J, et al. Sociodemographic and health-related risk factors associated with tooth loss among adults in Rhode Island. *Prev Chronic Dis* 2013;10:E45.
12. Bachkati K, Mortensen E, Brønnum-Hansen H, et al. Poor Oral Health in Late Life: Selected Predictors and Initiatives Towards Prevention of Tooth Loss. *J Gerontol Geriatr Res* 2017;6(2):398.
13. Yoshino K, Ito K, Kuroda M, et al. Tooth Loss in Problem-oriented, Irregular, and Regular Attenders at Dental Offices. *Bull Tokyo Dent Coll* 2016;57(1):11-9.
14. Sambunjak D, Nickerson Jason W, Poklepovic T, et al. Flossing for the management of periodontal diseases and dental caries in adults. *Cochrane Database Syst Rev* 2011(12):CD008829.

- 1 15. Islas-Granillo H, Borges-Yanez A, Medina-Solis CE, et al. Tooth-Loss  
2 Experience and Associated Variables among Adult Mexicans 60 Years and  
3 Older. *P R Health Sci J* 2016;35(2):88-92.
- 4 16. Armour BS, Swanson M, Waldman HB, et al. A profile of state-level differences  
5 in the oral health of people with and without disabilities, in the U.S., in 2004.  
6 *Public health reports* 2008;123(1):67-75.
- 7 17. Hall JP, Chapman SL, Kurth NK. Poor oral health as an obstacle to employment  
8 for Medicaid beneficiaries with disabilities. *J Public Health Dent*  
9 2013;73(1):79-82.
- 10 18. Oliveira JS, Prado Júnior RR, de Sousa Lima KR, et al. Intellectual disability and  
11 impact on oral health: a paired study. *Spec Care Dentist* 2013;33(6):262-8.
- 12 19. Ameer N, Palaparathi R, Neerudu M, et al. Oral hygiene and periodontal status of  
13 teenagers with special needs in the district of Nalgonda, India. *J Indian Soc*  
14 *Periodontol* 2012;16(3):421-5.
- 15 20. Cumella S, Ransford N, Lyons J, et al. Needs for oral care among people with  
16 intellectual disability not in contact with Community Dental Services. *J Intellect*  
17 *Disabil Res* 2000;44(1):45-52.
- 18 21. Anders PL, Davis EL. Oral health of patients with intellectual disabilities: a  
19 systematic review. *Spec Care Dentist* 2010;30(3):110-7.
- 20 22. Morgan JP, Minihan PM, Stark PC, et al. The oral health status of 4,732 adults  
21 with intellectual and developmental disabilities. *J Am Dent Assoc*  
22 2012;143(8):838-46.
- 23 23. Turner S, Sweeney M, Kennedy C, et al. The oral health of people with  
24 intellectual disability participating in the UK Special Olympics. *J Intellect*  
25 *Disabil Res* 2008;52(1):29-36.
- 26 24. Havercamp SM, Scott HM. National health surveillance of adults with disabilities,  
27 adults with intellectual and developmental disabilities, and adults with no  
28 disabilities. *Disabil Health J* 2015;8(2):165-72.
- 29 25. World Health Organization (WHO). *Disabilities*  
30 <http://www.who.int/topics/disabilities/en/>. (accessed 28 December 2016)
- 31 26. Ministry of Health and Welfare, Taiwan. *Statistics of General Health and*  
32 *Welfare*. [http://www.mohw.gov.tw/EN/Ministry/Statistic.aspx?f\\_list\\_no=474](http://www.mohw.gov.tw/EN/Ministry/Statistic.aspx?f_list_no=474).  
33 (accessed 28 January 2017)
- 34 27. Lai H-T, Kung P-T, Su H-P, et al. Examining related influential factors for dental  
35 calculus scaling utilization among people with disabilities in Taiwan, a  
36 nationwide population-based study. *Res Dev Disabil* 2014;35(9):2231-40.
- 37 28. National Health Insurance Administration (NHI), Taiwan. *Medical services*,

- 1  
2  
3  
4  
5 1 *assistances & cares.*  
6 2 [http://www.nhi.gov.tw/English/index.aspx?menu=8&menu\\_id=30&webdata\\_id=](http://www.nhi.gov.tw/English/index.aspx?menu=8&menu_id=30&webdata_id=0&WD_ID=30)  
7 3 [0&WD\\_ID=30](http://www.nhi.gov.tw/English/index.aspx?menu=8&menu_id=30&webdata_id=0&WD_ID=30). (accessed 5 April 2017)  
8  
9 4 29. Steele JG, Treasure E, Pitts NB, et al. Total tooth loss in the United Kingdom in  
10 5 1998 and implications for the future. *Br Dent J* 2000;189(11):598-603.  
11 6 30. Health Promotion Administration, Ministry of Health and Welfare. *Survey on the*  
12 7 *prevalence of hypertension, hyperglycemia and hyperlipidemia in Taiwan.*  
13 8 <http://www.hpa.gov.tw/BHPNet/Web/HealthTopic/Topic.aspx?id=20140929000>  
14 9 [1](http://www.hpa.gov.tw/BHPNet/Web/HealthTopic/Topic.aspx?id=20140929000). (accessed 28 January 2017)  
15  
16 10 31. Gabre P, Martinsson T, Gahnberg L. Longitudinal study of dental caries, tooth  
17 11 mortality and interproximal bone loss in adults with intellectual disability. *Eur J*  
18 12 *Oral Sci* 2001;109(1):20-6.  
19 13 32. Worthington Helen V, Clarkson Jan E, Bryan G, et al. Routine scale and polish for  
20 14 periodontal health in adults. *Cochrane Database Syst Rev* 2013(11):CD004625.  
21 15 33. Lindsay P. Care of the Adult with Intellectual Disability in Primary Care. London,  
22 16 UK: Radcliffe Pub. 2011.  
23 17 34. Di Benedetto A, Gigante I, Colucci S, et al. Periodontal disease: linking the  
24 18 primary inflammation to bone loss. *Clin Dev Immunol* 2013;2013(503754): 1-7.  
25 19 35. Graves DT, Li J, Cochran DL. Inflammation and uncoupling as mechanisms of  
26 20 periodontal bone loss. *J Dent Res* 2011;90(2):143-53.  
27 21 36. Poklepovic T, Worthington Helen V, Johnson Trevor M, et al. Interdental  
28 22 brushing for the prevention and control of periodontal diseases and dental caries  
29 23 in adults. *Cochrane Database Syst Rev* 2013(12):Cd009857.  
30 24 37. Marín M-J, Figuero E, González I. Comparison of the detection of periodontal  
31 25 pathogens in bacteraemia after tooth brushing by culture and molecular  
32 26 techniques. *Medicina oral, patologia oral y cirugia bucal* 2016;21(3):e276-84.  
33 27 38. Kim MJ, Noh H, Oh HY. Efficiency of professional tooth brushing before  
34 28 ultrasonic scaling. *Int J Dent Hyg* 2015;13(2):125-31.  
35 29 39. Bershadsky J, Kane RL. Place of residence affects routine dental care in the  
36 30 intellectually and developmentally disabled adult population on Medicaid. *Health*  
37 31 *Serv Res* 2010;45(5p1):1376-89.  
38 32 40. Elliott I, Nunn J, Sadlier D. Oral health & disability: the way forward Ireland:  
39 33 National Disability Authority; 2005  
40 34 <http://nda.ie/Image-Library/PDF-Downloads/PDF-Version-Oral-Health-The-Way>  
41 35 [-Forward-939-KB-.pdf](http://nda.ie/Image-Library/PDF-Downloads/PDF-Version-Oral-Health-The-Way). (accessed 10 August 2016)  
42  
43  
44  
45  
46  
47  
48  
49  
50  
51  
52  
53  
54  
55  
56  
57  
58  
59  
60



## STROBE Statement—checklist of items that should be included in reports of observational studies

|                              | Item No | Recommendation                                                                                                                                                                                                                                                                                                                                                                                                                                                                                                                                                                                                                                                                                   |
|------------------------------|---------|--------------------------------------------------------------------------------------------------------------------------------------------------------------------------------------------------------------------------------------------------------------------------------------------------------------------------------------------------------------------------------------------------------------------------------------------------------------------------------------------------------------------------------------------------------------------------------------------------------------------------------------------------------------------------------------------------|
| <b>Title and abstract</b>    | p1-3    | (a) Indicate the study's design with a commonly used term in the title or the abstract<br>(b) Provide in the abstract an informative and balanced summary of what was done and what was found                                                                                                                                                                                                                                                                                                                                                                                                                                                                                                    |
| <b>Introduction</b>          |         |                                                                                                                                                                                                                                                                                                                                                                                                                                                                                                                                                                                                                                                                                                  |
| Background/rationale         | P4-5    | Explain the scientific background and rationale for the investigation being reported                                                                                                                                                                                                                                                                                                                                                                                                                                                                                                                                                                                                             |
| Objectives                   | p5      | State specific objectives, including any prespecified hypotheses                                                                                                                                                                                                                                                                                                                                                                                                                                                                                                                                                                                                                                 |
| <b>Methods</b>               |         |                                                                                                                                                                                                                                                                                                                                                                                                                                                                                                                                                                                                                                                                                                  |
| Study design                 | P6      | Present key elements of study design early in the paper                                                                                                                                                                                                                                                                                                                                                                                                                                                                                                                                                                                                                                          |
| Setting                      | P6      | Describe the setting, locations, and relevant dates, including periods of recruitment, exposure, follow-up, and data collection                                                                                                                                                                                                                                                                                                                                                                                                                                                                                                                                                                  |
| Participants                 | P6      | (a) <i>Cohort study</i> —Give the eligibility criteria, and the sources and methods of selection of participants. Describe methods of follow-up<br><i>Case-control study</i> —Give the eligibility criteria, and the sources and methods of case ascertainment and control selection. Give the rationale for the choice of cases and controls<br><i>Cross-sectional study</i> —Give the eligibility criteria, and the sources and methods of selection of participants<br>(b) <i>Cohort study</i> —For matched studies, give matching criteria and number of exposed and unexposed<br><i>Case-control study</i> —For matched studies, give matching criteria and the number of controls per case |
| Variables                    | P6-8    | Clearly define all outcomes, exposures, predictors, potential confounders, and effect modifiers. Give diagnostic criteria, if applicable                                                                                                                                                                                                                                                                                                                                                                                                                                                                                                                                                         |
| Data sources/<br>measurement | P6-8    | For each variable of interest, give sources of data and details of methods of assessment (measurement). Describe comparability of assessment methods if there is more than one group                                                                                                                                                                                                                                                                                                                                                                                                                                                                                                             |
| Bias                         |         | Describe any efforts to address potential sources of bias                                                                                                                                                                                                                                                                                                                                                                                                                                                                                                                                                                                                                                        |
| Study size                   |         | Explain how the study size was arrived at                                                                                                                                                                                                                                                                                                                                                                                                                                                                                                                                                                                                                                                        |
| Quantitative variables       | P6-8    | Explain how quantitative variables were handled in the analyses. If applicable, describe which groupings were chosen and why                                                                                                                                                                                                                                                                                                                                                                                                                                                                                                                                                                     |
| Statistical methods          | P9-10   | (a) Describe all statistical methods, including those used to control for confounding<br>(b) Describe any methods used to examine subgroups and interactions<br>(c) Explain how missing data were addressed<br>(d) <i>Cohort study</i> —If applicable, explain how loss to follow-up was addressed<br><i>Case-control study</i> —If applicable, explain how matching of cases and controls was addressed<br><i>Cross-sectional study</i> —If applicable, describe analytical methods taking account of sampling strategy<br>(e) Describe any sensitivity analyses                                                                                                                                |

Continued on next page

**Results**

|                  |        |                                                                                                                                                                                                                                                                                                                                                                                                               |
|------------------|--------|---------------------------------------------------------------------------------------------------------------------------------------------------------------------------------------------------------------------------------------------------------------------------------------------------------------------------------------------------------------------------------------------------------------|
| Participants     | P10    | (a) Report numbers of individuals at each stage of study—eg numbers potentially eligible, examined for eligibility, confirmed eligible, included in the study, completing follow-up, and analysed<br>(b) Give reasons for non-participation at each stage<br>(c) Consider use of a flow diagram                                                                                                               |
| Descriptive data | P10–11 | (a) Give characteristics of study participants (eg demographic, clinical, social) and information on exposures and potential confounders<br>(b) Indicate number of participants with missing data for each variable of interest<br>(c) <i>Cohort study</i> —Summarise follow-up time (eg, average and total amount)                                                                                           |
| Outcome data     | P12–13 | <i>Cohort study</i> —Report numbers of outcome events or summary measures over time<br><i>Case-control study</i> —Report numbers in each exposure category, or summary measures of exposure<br><i>Cross-sectional study</i> —Report numbers of outcome events or summary measures                                                                                                                             |
| Main results     | p13–16 | (a) Give unadjusted estimates and, if applicable, confounder-adjusted estimates and their precision (eg, 95% confidence interval). Make clear which confounders were adjusted for and why they were included<br>(b) Report category boundaries when continuous variables were categorized<br>(c) If relevant, consider translating estimates of relative risk into absolute risk for a meaningful time period |
| Other analyses   |        | Report other analyses done—eg analyses of subgroups and interactions, and sensitivity analyses                                                                                                                                                                                                                                                                                                                |

**Discussion**

|                  |        |                                                                                                                                                                            |
|------------------|--------|----------------------------------------------------------------------------------------------------------------------------------------------------------------------------|
| Key results      | p16–20 | Summarise key results with reference to study objectives                                                                                                                   |
| Limitations      | P20    | Discuss limitations of the study, taking into account sources of potential bias or imprecision. Discuss both direction and magnitude of any potential bias                 |
| Interpretation   | p16–20 | Give a cautious overall interpretation of results considering objectives, limitations, multiplicity of analyses, results from similar studies, and other relevant evidence |
| Generalisability | P22    | Discuss the generalisability (external validity) of the study results                                                                                                      |

**Other information**

|         |     |                                                                                                                                                               |
|---------|-----|---------------------------------------------------------------------------------------------------------------------------------------------------------------|
| Funding | P22 | Give the source of funding and the role of the funders for the present study and, if applicable, for the original study on which the present article is based |
|---------|-----|---------------------------------------------------------------------------------------------------------------------------------------------------------------|

\*Give information separately for cases and controls in case-control studies and, if applicable, for exposed and unexposed groups in cohort and cross-sectional studies.

**Note:** An Explanation and Elaboration article discusses each checklist item and gives methodological background and published examples of transparent reporting. The STROBE checklist is best used in conjunction with this article (freely available on the Web sites of PLoS Medicine at <http://www.plosmedicine.org/>, Annals of Internal Medicine at <http://www.annals.org/>, and Epidemiology at <http://www.epidem.com/>). Information on the STROBE Initiative is available at [www.strobe-statement.org](http://www.strobe-statement.org).
